# Supplementary material for: Identifying the genetic basis and molecular mechanisms underlying phenotypic correlation between complex human traits using a gene-based approach
Source: Research Square preprint supplement (doi:10.21203/rs.3.rs-108940/v1), 2020-12-02
Supplement: Supplementary file 1 [file 15976f4d181cf3a9e4e293c5.xlsx]

## Sheet: p-value for similarity scores
	ADHD	Acute Lymphoblastoid Leukemia	Age At Menarche	Age Related Macular Degeneration	Agreeableness	Alcoholism	AD_1	AD_2	AD_3	AD_4	Anorexia Nervosa	Asthma	Autism_1	Autism_2	BMI	Bipolar Disorder	Bipolar Disorder And Schizophrenia	Birth Weight	Breast Cancer_1	Breast Cancer_2	Childhood Intelligence	Childhood Obesity	Cholesterol	Chronic Kidney Disease_1	Chronic Kidney Disease_2	Coronary Artery Disease	Crohn Disease	Depressive	Diabetes_1	Diabetes_2	Diastolic Blood Pressure	Early Growth	Education Attainment - College	Extraversion	Fasting Glucose	Fasting Insulin	Five Psychiatric Diseases	Glaucoma	Glioma	HDL	Head Circumference	Height	Juvenile Arthritis	LDL	Longevity_1	Longevity_2	Lung Cancer	Metformin	Neuroblastoma
ADHD	0	0.0505146	0.0145706	0.0268758	0.0316174	0.0235145	0.000664953	0.187452	0.0741059	0.388346	0.00333754	0.0332892	3.37e-05	0.0499058	0.00188551	1.87e-07	5.44e-06	0.0293242	0.175106	0.421229	0.00274212	0.00255574	0.1323	0.0227539	6.9e-05	0.00609888	0.00146894	0.0329276	0.00129483	0.0755624	0.00145362	0.0179641	0.000622626	0.105243	0.0175135	0.407325	3.91e-23	0.000992321	0.00596364	0.0330653	0.00435929	0.043255	0.00061605	0.315308	0.0762311	0.00723656	0.00215105	0.0116067	0.011028
Acute Lymphoblastoid Leukemia	0.0515871	0	0.162108	0.39533	0.00959798	0.138517	0.00787073	0.492888	0.00743564	0.00482619	0.00197741	0.00219036	0.0828679	0.0702838	0.0738358	0.201352	0.135502	0.101133	3.75e-08	0.203499	0.000139724	0.0362351	0.0954982	0.104656	0.44552	0.0120745	0.0175572	0.120921	0.0574033	0.000369476	0.258741	1.11e-05	0.00726803	0.288081	0.0348006	0.039373	0.162067	0.00685714	0.000701975	0.0067618	0.0751433	0.1156	0.0355138	0.122789	0.00363172	0.096039	0.0105492	3.1e-06	0.00138031
Age At Menarche	0.0141257	0.16417	0	0.328889	0.119634	0.0531143	0.00120221	0.19778	0.0800174	0.498329	0.00208321	0.0165385	0.00702303	0.0141031	4.56e-30	0.000478566	2.95e-06	0.00979713	0.467566	0.0570951	0.00250178	8.49e-08	0.00264987	0.000348966	0.0613609	0.0292408	0.00095274	0.089715	0.00957367	0.0129506	0.0361456	7.05e-05	1.62e-12	0.165021	2.86e-05	0.0190107	0.0010613	0.114326	0.000621049	3.39e-06	0.0164504	6.7e-17	0.253532	0.048212	0.00276813	0.0264354	0.354239	0.0569041	0.0514436
Age Related Macular Degeneration	0.0267453	0.397435	0.327579	0	0.351953	0.288657	0.0077222	0.160535	0.0784114	0.087221	0.468886	0.395572	0.0537638	0.370146	0.00696734	0.462509	0.0256359	0.205795	0.000201757	1.31e-05	0.0774323	0.218895	5.82e-05	0.0231737	0.00262348	0.0499435	0.111347	0.291328	0.0604476	0.124368	0.0928322	0.148512	0.41882	0.3198	0.288102	0.332588	0.0604188	0.112316	0.195919	0.00304704	0.406025	0.0168517	0.282709	0.00531488	0.0990077	0.441007	0.279027	0.385261	0.191356
Agreeableness	0.0304242	0.00978361	0.120265	0.350638	0	0.00259941	0.000852233	0.225852	0.0036664	0.316256	0.00692623	0.0532987	0.000197647	0.0229567	0.0186188	0.00894573	0.0045686	0.0755906	0.163055	0.0647896	0.00226691	0.00583855	0.00903308	0.0635681	0.213557	0.0352289	0.00252362	0.326476	0.0122922	0.0032257	0.205766	0.0034558	0.000841787	0.449957	0.00723148	0.00915363	0.00702973	0.0220765	0.0148161	0.0727936	0.0554921	0.214065	0.0159034	0.0606864	0.0573879	0.0452007	0.0980099	0.108847	0.000136985
Alcoholism	0.0238721	0.132035	0.0525586	0.287249	0.00260183	0	0.104318	0.49888	0.040163	0.0173166	0.00717922	0.00519282	0.219047	0.433702	0.0010596	0.0875546	0.244947	0.0882383	0.00108606	0.368783	0.00100046	0.0240404	0.001079	0.474887	0.203448	0.0389888	0.00894981	0.102832	0.00690093	0.00132596	0.0182433	0.0241162	0.0161182	0.457865	0.106277	0.0456167	0.128151	0.00975418	0.0294493	0.032327	0.00693368	0.135603	0.000247048	0.00305908	0.228688	0.000466046	0.0355465	0.0719368	0.145704
AD_1	0.000724695	0.00729209	0.00123207	0.00804536	0.000845581	0.100457	0	0.00905149	4.21e-07	0.0280934	0.00051465	0.00687763	3.13e-07	0.160612	3.51e-05	1.02e-09	6.23e-09	0.0136536	0.0303607	0.0822869	0.000881198	0.0110068	0.000371525	1.9e-05	1.95e-05	0.0178243	0.00656896	0.0587723	0.0106693	0.000391098	0.347471	0.0301477	0.0138468	0.0271071	0.00113304	0.313545	8.97e-09	0.000185523	0.00373204	0.024924	0.285316	2.02e-05	0.0286457	0.00297532	0.00135984	0.00183189	0.0096717	2.79e-05	0.00840195
AD_2	0.191669	0.492505	0.199092	0.159881	0.224058	0.495299	0.00944678	0	7.9e-92	2.01e-11	0.47101	0.204333	0.0546689	0.426184	0.00328736	0.137855	0.0164092	0.403946	0.0220054	0.256618	0.362193	0.279961	0.00639346	0.199633	0.0564201	0.115296	0.33097	0.439108	0.428125	0.334487	0.38426	0.326041	0.0145453	0.492697	0.418963	0.222921	0.0534311	0.194851	0.231559	0.0101492	0.224651	0.000238959	0.115209	0.0264254	0.0718299	0.0243648	0.281978	0.415775	0.317664
AD_3	0.0742799	0.00718172	0.0811301	0.0778166	0.00375865	0.040194	3.56e-07	1.02e-92	0	4.63e-07	0.0506091	0.0375617	0.0259134	0.290275	1.24e-08	0.125298	0.000323843	0.00138785	0.034911	0.168219	0.0163774	0.0135041	3.75e-05	0.0778625	0.0011615	2.65e-05	0.00686363	0.33118	0.223748	0.00311271	0.348856	0.000641318	0.00600821	0.186781	0.0279331	0.0353541	0.0085613	0.000193445	0.00658613	0.000292954	0.339292	1.77e-10	0.000244644	0.00263719	6.7e-05	0.0118495	0.00710517	0.00204857	0.0214872
AD_4	0.38604	0.00460953	0.495294	0.0879297	0.315016	0.0175952	0.0282299	1.77e-11	4.53e-07	0	0.177975	0.327735	0.405352	0.195196	0.127135	0.25663	0.252844	0.15076	3.82e-08	0.00308027	0.170148	0.122867	0.405212	0.0466002	0.0307908	0.191069	0.276233	0.223368	0.161722	0.174699	0.161711	0.069777	0.31126	0.0340623	0.0329756	0.227148	0.0545905	0.183494	0.0577335	0.259606	0.0507179	0.140063	0.207288	0.386685	0.364754	0.0679747	0.333033	0.253077	0.382683
Anorexia Nervosa	0.00326847	0.00198275	0.0021067	0.470233	0.00712967	0.00707453	0.000519617	0.469829	0.0494759	0.179447	0	0.0861344	0.00352131	0.121946	0.000600761	4.49e-05	0.000175806	0.15839	0.0102205	0.294258	0.000843013	0.014164	0.00607216	0.0107108	0.0415206	0.00388587	0.000836098	0.433128	0.0395381	0.00210087	0.0892362	0.0200777	0.000694222	0.139794	0.0164744	0.0110691	0.000477635	0.00691462	0.00460205	0.144919	0.0883362	0.0204243	0.0033321	0.0103995	0.00456001	0.0252893	0.060602	0.0371021	0.000984032
Asthma	0.0346205	0.00234465	0.0159843	0.393261	0.0550665	0.00502774	0.00673503	0.205773	0.0357613	0.326238	0.0873314	0	0.0319089	0.083145	0.0298164	0.17316	0.00307813	0.0739017	0.311748	0.409904	0.0614858	0.0579952	0.0787711	0.0648374	0.177354	0.0124286	0.0277798	0.254278	0.130043	0.0243819	0.316153	0.00416286	0.0478263	0.457086	0.00470234	0.245639	0.00419711	0.00566002	0.0355817	0.000161756	0.125538	0.0761413	0.0586182	0.0736904	0.0144588	0.01914	0.0325899	8.86e-05	0.0323699
Autism_1	3.16e-05	0.0843815	0.00651158	0.0547401	0.000210813	0.226624	3.82e-07	0.05495	0.0251447	0.405003	0.00344834	0.0324949	0	0	2.61e-05	2.93e-05	1.24e-08	0.0924345	0.000152572	0.025592	0.000396919	0.000367397	0.00201007	8.92e-05	3.62e-05	0.0544643	0.000649272	0.249088	0.15567	0.0308738	0.00131644	0.0105943	0.00264994	0.127413	0.10464	0.479442	3.74e-67	0.00161265	0.00180254	0.233133	0.0184873	0.000535647	0.00118721	0.00170917	0.0138393	0.0172172	0.0947102	0.00236859	0.0232262
Autism_2	0.0502177	0.070705	0.0140401	0.367096	0.0233745	0.441652	0.161702	0.431625	0.288873	0.194699	0.117091	0.0832347	0	0	0.000890198	0.173468	0.00289105	0.366543	0.329506	0.224017	0.0343875	0.0652388	0.114935	0.0700469	0.110834	0.432251	0.0243906	0.173728	0.329324	0.0264811	0.00563374	0.164715	0.0104804	0.2256	0.116458	0.0681634	1.01e-17	0.030831	0.133926	0.437285	0.17638	0.115286	0.0270678	0.0367327	0.273267	0.0575867	0.327562	0.129146	0.158802
BMI	0.00196507	0.0752523	1.67e-30	0.00710952	0.0173652	0.00113299	3.62e-05	0.00324846	1.07e-08	0.126387	0.000580137	0.0311716	2.51e-05	0.000902883	0	8.2e-05	3.54e-11	0.00609735	0.00995091	7.02e-06	0.0219623	1e-24	6.86e-13	1.79e-09	1.52e-07	0.00537597	8.73e-09	0.00200754	4.43e-06	0.00892493	2.58e-08	0.000209775	1.68e-09	0.00984376	8.71e-05	1.31e-05	1.79e-08	0.00163631	0.136572	1.99e-31	0.330618	2.44e-30	0.0642179	3.76e-09	3.52e-05	0.00116335	0.0571812	0.0506387	0.0200916
Bipolar Disorder	1.88e-07	0.196577	0.000509687	0.465603	0.00824176	0.0855813	1.05e-09	0.138508	0.127613	0.256408	4.56e-05	0.173539	3.46e-05	0.180189	7.82e-05	0	4.98e-179	0.0160022	0.000963615	0.0642666	0.0100232	0.0163298	0.00285139	4.63e-05	0.00420473	0.010975	0.000153865	0.00909487	0.00102009	0.000262691	0.000210765	0.211839	7.59e-05	0.363497	0.0666791	0.476457	2.23e-120	0.000408518	0.00412449	1.01e-05	0.161385	8.78e-08	0.0390962	0.00522335	0.14703	0.0110497	0.0852848	0.0529608	0.00244193
Bipolar Disorder And Schizophrenia	5.41e-06	0.130375	2.71e-06	0.0265339	0.00398994	0.246023	5.45e-09	0.0165572	0.000345163	0.255058	0.00018347	0.00312807	1.3e-08	0.00309473	3.74e-11	1.71e-179	0	0.0257074	1.68e-05	0.0117814	0.0020277	0.0150855	0.0123808	3.26e-06	6.76e-05	0.0218985	1.49e-06	0.01053	0.00088248	0.0138332	2.31e-05	0.260656	2.33e-07	0.0665388	0.0750707	0.283317	0	0.000202844	0.000451454	0.00017434	0.060467	1.24e-10	0.00749368	0.0156827	0.111089	0.00653139	0.257906	0.00784543	0.000197477
Birth Weight	0.0309002	0.0999371	0.010063	0.204967	0.0732598	0.0853222	0.0138726	0.402016	0.00135435	0.150224	0.160698	0.0717461	0.0931724	0.365378	0.00570314	0.0146883	0.0251152	0	0.262633	0.375012	0.216735	0.000104653	0.0124093	0.128829	0.346855	0.110469	0.00217687	0.253538	0.0956274	0.00241727	0.00357777	0.172595	0.359038	0.431831	0.00166707	0.0190008	0.202236	0.129414	0.151368	0.0251566	0.00368991	9.9e-08	0.104439	0.0339007	0.000907052	0.24119	0.375495	0.269713	0.187998
Breast Cancer_1	0.174699	3.41e-08	0.465701	0.000198658	0.163847	0.00107626	0.0304835	0.0216967	0.0338289	3.91e-08	0.0106716	0.319816	0.000157318	0.331641	0.00988087	0.000970684	1.66e-05	0.264176	0	0.000156785	0.0055373	0.411393	0.396191	1.93e-08	6.41e-09	0.0267196	0.225617	0.277923	0.283629	0.0569705	0.495912	3.16e-05	0.0248889	0.00308144	1.14e-15	5.01e-08	2.99e-07	0.318737	0.0115023	0.279027	0.0155841	0.000132709	0.00200881	0.266794	0.0357886	3.21e-05	4.29e-11	0.0750266	0.013066
Breast Cancer_2	0.417248	0.206401	0.0586327	1.12e-05	0.0665942	0.368653	0.081243	0.25575	0.16731	0.00308029	0.295181	0.408992	0.0258309	0.225939	6.15e-06	0.068039	0.0117348	0.376315	0.000158383	0	0.443697	0.0523972	0.0031142	0.0017885	0.203644	0.126306	0.000175242	0.370861	0.0248109	0.361003	0.0134051	0.452256	0.041015	0.0369995	0.208667	0.155498	0.0232536	0.163053	0.384511	0.0476692	0.415717	1.18e-11	0.274231	0.00445272	0.140702	0.260847	0.427495	0.261449	0.324673
Childhood Intelligence	0.00257274	0.000137989	0.00234948	0.0779854	0.00240311	0.00103245	0.000818749	0.364993	0.0163198	0.169533	0.000839567	0.060077	0.000411412	0.0348561	0.0220226	0.0104845	0.00193697	0.213042	0.00584738	0.446044	0	0.0409911	0.10132	0.0516807	0.0117076	0.00376805	0.00898114	0.26253	0.00875024	0.00995617	0.220558	0.000100668	3.05e-05	0.0706568	0.000736333	0.238657	0.00138702	0.00955035	0.055573	0.217532	0.0241892	0.057224	0.000807525	0.0267332	0.0247375	0.000571798	0.010947	0.00105399	8.07e-05
Childhood Obesity	0.00262703	0.036962	9.32e-08	0.214938	0.00579857	0.0241007	0.0112873	0.282521	0.0133844	0.117393	0.0140837	0.0570638	0.000359667	0.0661279	9.46e-25	0.0157387	0.0154182	0.000112017	0.411905	0.0537031	0.0408298	0	0.000308203	0.0187893	0.00432439	0.0169178	0.0120294	0.0537866	0.000291819	0.0106228	3.11e-05	0.00063432	0.000760847	0.25055	0.0368662	0.0699893	0.000252309	0.0820099	0.0280841	0.000229028	0.00211584	2.84e-06	0.0258687	0.00073174	0.00259427	0.0414348	0.159632	0.0271091	0.00972038
Cholesterol	0.131725	0.0983987	0.00254013	6.68e-05	0.00925702	0.00105744	0.000382442	0.00636773	3.57e-05	0.407083	0.00592289	0.0778726	0.00224685	0.114787	5.48e-13	0.00317142	0.0134328	0.0120911	0.400368	0.00333369	0.0973308	0.000334027	0	4.71e-10	0.00581346	0.00143898	0.000110524	0.201159	0.000318897	0.00457032	0.00156223	0.00666482	0.00336172	0.122588	1.51e-07	0.0124838	0.0495637	0.00330943	0.0448518	2.2e-57	3.47e-05	2.75e-13	0.154783	0	0.00130156	0.00565814	0.0706533	0.024173	0.0119312
Chronic Kidney Disease_1	0.0238074	0.105167	0.000384833	0.0251719	0.0655225	0.476374	1.97e-05	0.197613	0.0758973	0.045958	0.0104605	0.0622344	9.93e-05	0.0722226	2.03e-09	4.36e-05	3.78e-06	0.128723	1.8e-08	0.00185159	0.0499887	0.0180102	6e-10	0	5.11e-06	0.0542756	0.00114517	0.0939665	7.72e-06	0.00183204	1.96e-05	0.0393255	0.00693973	0.0371308	0.00236681	0.30294	3.6e-06	0.00184044	0.00581277	2.3e-08	0.201964	6.8e-11	0.0695048	1e-08	0.0606154	0.0289158	0.339748	0.00238715	0.000315406
Chronic Kidney Disease_2	6.86e-05	0.44257	0.0599982	0.0026592	0.216497	0.197366	1.68e-05	0.0564316	0.00115466	0.0305202	0.0406512	0.176947	3.73e-05	0.113415	1.66e-07	0.00361917	7.02e-05	0.343498	6.48e-09	0.204836	0.0120344	0.00421323	0.00595259	4.76e-06	0	0.0158278	0.00572576	0.425643	0.0436161	0.266228	0.0358298	0.0379328	0.00558186	0.184391	0.190842	0.298316	8.61e-05	0.00836375	0.0514191	0.257973	0.335291	0.000284293	0.0244216	0.028842	0.0261225	0.164769	0.359964	0.00336801	0.0171149
Coronary Artery Disease	0.00592461	0.011733	0.0277701	0.0528743	0.036784	0.0380025	0.0177163	0.120455	3e-05	0.194794	0.00380643	0.0133805	0.0558295	0.434256	0.00552465	0.0109048	0.0205518	0.109848	0.0257941	0.129937	0.00379446	0.0163867	0.00159629	0.0552816	0.0154922	0	0.00201191	0.17359	0.0084554	2.37e-05	0.000400821	9.37e-05	0.0172084	0.418936	2.21e-05	0.0612511	0.111604	0.000534108	0.000420767	0.000860826	0.0119886	0.0462164	0.000864193	0.000390842	0.028622	3.8e-05	0.00280429	0.00116932	3.42e-05
Crohn Disease	0.0015719	0.0176804	0.000955851	0.110823	0.00249329	0.0087643	0.00658247	0.33277	0.006819	0.275487	0.000844809	0.0275892	0.000592142	0.0248136	6.86e-09	0.00014517	1.42e-06	0.00195461	0.223291	0.000172976	0.00896779	0.01232	0.000116347	0.00112779	0.00565596	0.00187357	0	0.223021	0.00252349	3.19e-05	0.0323055	0.00084121	1.49e-09	0.116237	4.32e-05	0.031891	0.00177307	3.38e-05	0.000597802	1.38e-05	0.0445048	1.37e-06	0.00243469	0.000659636	0.000505657	0.00970864	0.131653	0.0168464	4.07e-06
Depressive	0.0346537	0.119407	0.0897514	0.289114	0.326389	0.10151	0.0612019	0.440668	0.328645	0.224365	0.431113	0.250338	0.245154	0.177822	0.0018286	0.00913789	0.0108624	0.252185	0.272183	0.373213	0.259539	0.0531248	0.197766	0.0944487	0.424948	0.176624	0.225147	0	0.313876	0.170454	0.0849012	0.343908	0.00534892	0.0576574	0.0553795	0.0583075	0.000108324	0.163446	0.232018	0.000170544	0.0303493	0.0639555	0.493922	0.3541	0.140035	0.00273216	0.172795	0.226606	0.239566
Diabetes_1	0.00139692	0.0599589	0.00995502	0.0582652	0.0121356	0.00628502	0.0106028	0.42807	0.226844	0.163314	0.0388888	0.13027	0.150561	0.326951	4.67e-06	0.000980451	0.000969292	0.0980929	0.283164	0.0241732	0.00835366	0.000249221	0.000315037	7.68e-06	0.0450408	0.00793412	0.00252998	0.307501	0	5.06e-179	0.000967386	0.0451272	0.07369	0.221944	2.87e-14	0.0602825	0.000850445	0.0187641	0.0252055	4.09e-09	0.0172545	9.07e-07	0.0196156	7.56e-05	0.00326838	0.0423267	0.234571	0.0326843	0.000346252
Diabetes_2	0.0759611	0.000348995	0.01343	0.122087	0.00356859	0.00123958	0.000392834	0.334614	0.00328369	0.174889	0.00196487	0.0246933	0.0301216	0.0252868	0.0087607	0.000264933	0.0136132	0.00228471	0.0567491	0.360477	0.00939531	0.0100632	0.00452773	0.00173188	0.267431	2.47e-05	3.51e-05	0.172121	6.14e-180	0	0.000162052	0.00476318	0.00562094	0.177094	2.71e-07	0.0519934	0.0214079	0.0747046	0.0124367	0.00107309	0.0212937	0.004209	0.0042639	0.0034932	0.00540382	0.0105118	0.120944	0.0506342	0.00159412
Diastolic Blood Pressure	0.00144811	0.257446	0.037522	0.0941358	0.207295	0.0183701	0.347497	0.378089	0.345399	0.158548	0.0905344	0.322558	0.00133074	0.00547538	3.05e-08	0.000231051	2.46e-05	0.00371879	0.496932	0.0128342	0.215832	3.04e-05	0.00156359	1.8e-05	0.0378125	0.000408479	0.0322753	0.0862517	0.000916435	0.000162899	0	0.26908	0.00590337	0.103047	0.0149019	0.0280653	0.000247918	0.00880912	0.00411656	1.41e-05	0.00111621	4.88e-09	0.0132928	0.000409091	0.0152442	0.0295843	0.463136	0.219296	0.0219053
Early Growth	0.0180505	1.01e-05	6.86e-05	0.147749	0.00337549	0.0244366	0.0296555	0.323503	0.000589051	0.0733176	0.0205217	0.00447444	0.00985376	0.162573	0.000222993	0.210779	0.265056	0.171598	3.37e-05	0.451721	0.000105217	0.000656827	0.00659068	0.039548	0.0375464	8.65e-05	0.000805054	0.348577	0.0466929	0.00466573	0.268829	0	0.00302529	0.487434	1.39e-06	0.0140944	0.130061	0.0720388	0.00375044	0.00247035	0.0172108	0.137914	0.00171782	0.00574646	0.0306411	0.113098	0.0046109	0.0031915	0.00119514
Education Attainment - College	0.000567831	0.00740841	1.98e-12	0.418069	0.000889823	0.0161812	0.0139094	0.0147669	0.00564054	0.3098	0.000688917	0.0496356	0.00278225	0.010371	1.76e-09	6.96e-05	2.17e-07	0.351213	0.024275	0.0415601	3.04e-05	0.000753832	0.00345777	0.00725326	0.00529629	0.0160841	1.52e-09	0.00561558	0.075545	0.00581702	0.00576964	0.00298605	0	0.0766489	0.000905928	2.62e-05	0.000617705	0.0139904	0.00135866	9.92e-05	0.000495904	0.000605923	0.00815656	0.00315324	0.00686639	0.0590664	0.143175	0.0719081	0.00208784
Extraversion	0.105622	0.285326	0.169548	0.321871	0.453557	0.460944	0.0267245	0.493868	0.187986	0.0338634	0.137421	0.455518	0.130371	0.226911	0.00926231	0.368975	0.0642574	0.428097	0.00310234	0.036005	0.0692007	0.251314	0.125056	0.0343844	0.183304	0.415091	0.122056	0.0570726	0.226332	0.176058	0.108058	0.490977	0.077863	0	0.312361	0.372649	0.0284929	0.246559	0.247604	0.168183	0.476607	0.011184	0.279019	0.1323	0.261458	0.374496	0.354646	0.341612	0.24244
Fasting Glucose	0.0169463	0.032443	3.18e-05	0.289633	0.00750933	0.105155	0.00109277	0.419045	0.0288621	0.0338927	0.0161109	0.00445319	0.104646	0.114829	8.34e-05	0.0653936	0.0726586	0.00172267	9.88e-16	0.205464	0.00069801	0.0370831	1.19e-07	0.00234941	0.19309	2.41e-05	4.56e-05	0.0580945	1.99e-14	2.42e-07	0.0158106	1.27e-06	0.000975493	0.314463	0	3.88e-14	0.0459913	0.000266095	0.00465332	1.13e-18	0.00887296	2.62e-10	0.0404381	1.34e-06	1.5e-05	0.000863056	5.46e-14	0.0245065	0.000885005
Fasting Insulin	0.406688	0.0387578	0.0174961	0.33217	0.00949735	0.0461215	0.317448	0.229251	0.0368694	0.224618	0.0107036	0.24489	0.482573	0.0649872	1.52e-05	0.477567	0.281822	0.0186103	4.12e-08	0.155303	0.242856	0.0699172	0.0123317	0.301089	0.300295	0.062616	0.0311747	0.0578534	0.0622074	0.0524616	0.0279441	0.0145719	2.52e-05	0.369176	4.69e-14	0	0.265169	0.051381	0.426542	3.99e-05	0.0191022	2.97e-05	0.161039	0.0267443	0.00792101	0.0746726	0.0963683	0.15497	0.248501
Five Psychiatric Diseases	3.3e-23	0.158222	0.00101557	0.0616961	0.00723773	0.131015	7.54e-09	0.0536461	0.00840203	0.0552662	0.000441155	0.00407932	9.25e-68	1.11e-17	1.93e-08	3.79e-122	0	0.207206	3.01e-07	0.0241987	0.00136913	0.000240618	0.0480637	3.81e-06	8.14e-05	0.110242	0.00186198	0.000111377	0.00081936	0.0216175	0.000259275	0.132992	0.000596357	0.0288853	0.0443653	0.263509	0	0.00070794	0.000173461	0.00137309	0.00442585	2.25e-09	0.000884233	0.0224613	0.0578169	0.0760282	0.185022	0.0545887	0.000244755
Glaucoma	0.000951673	0.00673221	0.114394	0.108833	0.0219074	0.00931203	0.000206744	0.193144	0.000212161	0.179329	0.0071389	0.00559707	0.0017647	0.0294654	0.00149124	0.000417924	0.000190276	0.129977	0.317027	0.17066	0.00952479	0.0814257	0.00326111	0.00169667	0.00845846	0.000545781	3.18e-05	0.159915	0.020473	0.0757439	0.009478	0.0724046	0.0146287	0.247785	0.000265694	0.0514514	0.000689339	0	0.00250146	0.119395	0.00125593	2.3e-05	5.41e-05	0.00479031	0.01051	0.00014398	0.0277979	2.22e-05	0.00383082
Glioma	0.00577351	0.000704423	0.000619473	0.197246	0.0150752	0.0282271	0.00376517	0.232849	0.00643177	0.0562452	0.00427497	0.0358523	0.00183938	0.137625	0.13697	0.00421662	0.000441472	0.156616	0.0112413	0.38597	0.0557213	0.0278762	0.0432404	0.00604212	0.0520032	0.000454539	0.000623175	0.234722	0.0246501	0.0128138	0.00417862	0.00363231	0.00124269	0.24755	0.00475557	0.426047	0.000193628	0.0025237	0	0.000566167	0.0207074	0.0186224	0.00425805	0.034845	0.0297493	0.000116854	0.275093	0.000305725	0.000969755
HDL	0.0322653	0.00697019	3.71e-06	0.00324545	0.0735334	0.0323789	0.0249104	0.00953215	0.000294803	0.255391	0.146769	0.000180756	0.235305	0.43402	2.06e-31	1.06e-05	0.00018312	0.0257236	0.281423	0.0491324	0.217455	0.00023558	5.95e-58	2.04e-08	0.255443	0.000915429	1.55e-05	0.000175349	3.49e-09	0.00110119	1.3e-05	0.00262935	9.71e-05	0.168245	1.35e-18	3.72e-05	0.00133648	0.118601	0.00061682	0	0.0149238	4.29e-15	0.0089049	4.69e-25	0.000351537	0.0163607	0.0815098	0.0104351	0.000421448
Head Circumference	0.00409862	0.074741	0.0165533	0.406359	0.0568106	0.00655259	0.281365	0.216788	0.329723	0.0510185	0.0899132	0.128197	0.0175381	0.173212	0.331758	0.163032	0.0609407	0.00382782	0.0155888	0.420719	0.0235948	0.00198563	3.16e-05	0.199075	0.332085	0.01154	0.0432449	0.0313957	0.0166417	0.0217014	0.00106865	0.0168924	0.000501309	0.464928	0.00932761	0.0193236	0.00486553	0.00129378	0.0211302	0.0141818	0	0.000152688	0.242019	0.000270768	0.0967901	0.0435773	0.444827	0.304529	0.237184
Height	0.0416732	0.115603	5.41e-17	0.0168802	0.217387	0.137408	2.02e-05	0.000261568	1.23e-10	0.13837	0.0201886	0.0765177	0.000511435	0.117459	1.55e-30	9.89e-08	1.82e-10	1.16e-07	0.000130806	8.26e-12	0.0592423	2.74e-06	2.71e-13	7.1e-11	0.000294356	0.0458895	1.57e-06	0.0644074	9.52e-07	0.00423003	4.07e-09	0.136368	0.000580029	0.0108887	3.15e-10	2.89e-05	2.43e-09	2.36e-05	0.0192339	6.85e-15	0.00016423	0	0.216211	1.46e-11	0.00440163	0.00879665	0.168343	0.0577627	0.0248497
Juvenile Arthritis	0.000696759	0.0359163	0.250946	0.27935	0.0156922	0.000254898	0.0281184	0.113987	0.00025121	0.208774	0.0035083	0.0601159	0.00119015	0.0252984	0.0642933	0.039454	0.00792928	0.100324	0.00206581	0.277249	0.000802362	0.026092	0.152675	0.071426	0.0244998	0.000901656	0.00257709	0.492637	0.0191309	0.00407146	0.0131657	0.00172699	0.00826748	0.279511	0.0411189	0.156898	0.000960967	6.89e-05	0.0041946	0.00926057	0.244851	0.21467	0	0.145107	0.0267274	0.00163744	0.0026178	0.000756637	0.00189127
LDL	0.315691	0.12654	0.0498838	0.00558709	0.0612428	0.00286885	0.00308499	0.0263358	0.00258963	0.385769	0.010283	0.07348	0.00183944	0.0363201	3.39e-09	0.00551771	0.0172329	0.0327997	0.271756	0.00476783	0.0259761	0.00073222	0	9.77e-09	0.0278829	0.000343116	0.000664095	0.35906	7.86e-05	0.0034102	0.00041818	0.00560061	0.00304377	0.128447	1.47e-06	0.0257215	0.02347	0.00457723	0.0358209	7.35e-25	0.000306702	1.53e-11	0.147687	0	0.000895594	0.00075158	0.0809397	0.123955	0.0767632
Longevity_1	0.0764049	0.00388694	0.00302882	0.0985264	0.0564044	0.230351	0.00132522	0.0699832	5.44e-05	0.362699	0.00481824	0.0147023	0.0142119	0.276266	3.47e-05	0.146844	0.113794	0.000865389	0.0359008	0.139763	0.025875	0.00251007	0.0012601	0.0605101	0.0266807	0.0299675	0.000472115	0.143452	0.00302132	0.00527438	0.015839	0.0310602	0.00670655	0.265337	1.41e-05	0.00754213	0.0580243	0.0105612	0.0293679	0.000356143	0.0962415	0.00444817	0.0266224	0.000851988	0	0.0537591	0.0656622	0.0337187	0.0199412
Longevity_2	0.00728156	0.0949204	0.0248859	0.436076	0.0450187	0.00041674	0.00186049	0.0248405	0.0119193	0.0710463	0.0244364	0.018881	0.0179437	0.0591833	0.00109895	0.0112571	0.00660398	0.237932	2.92e-05	0.258836	0.000508961	0.0427025	0.0058612	0.0298469	0.161529	3.56e-05	0.0103542	0.00290249	0.0428059	0.0109278	0.0312982	0.115809	0.0587908	0.373646	0.000792814	0.0769104	0.0767175	0.000134805	0.0001041	0.0165844	0.04343	0.00882857	0.00175802	0.000806779	0.0530606	0	0.000885514	0.00401144	0.000127927
Lung Cancer	0.00218416	0.0106031	0.346922	0.285609	0.0974377	0.0359842	0.00949359	0.283195	0.00758177	0.333733	0.058859	0.032802	0.0947942	0.325079	0.0558151	0.0864557	0.254477	0.376707	3.63e-11	0.427123	0.0107495	0.160212	0.0673679	0.345405	0.362736	0.00308207	0.130466	0.176921	0.230673	0.12258	0.457702	0.00480368	0.140913	0.354001	4.99e-14	0.0952368	0.18157	0.0282162	0.27471	0.0816824	0.43835	0.166481	0.00291781	0.078713	0.0664973	0.000849558	0	0.000263824	0.00657765
Metformin	0.0118665	3.03e-06	0.0585334	0.388311	0.109677	0.070429	2.84e-05	0.413452	0.00191398	0.249525	0.0380613	8.92e-05	0.00227064	0.128328	0.0517615	0.0508131	0.00763251	0.269914	0.0782263	0.261983	0.001073	0.0265056	0.0236218	0.00241664	0.0034135	0.0012092	0.0167127	0.226239	0.0337969	0.0482609	0.218889	0.00326545	0.0708113	0.34108	0.0253996	0.152036	0.0542916	2.43e-05	0.000283986	0.0105621	0.296945	0.059456	0.000762596	0.123723	0.031747	0.00429753	0.000299539	0	0.00122265
Neuroblastoma	0.0107885	0.00128704	0.0507092	0.182057	0.000143778	0.144575	0.00831367	0.320416	0.0215585	0.37834	0.00104585	0.0328525	0.0228354	0.160467	0.0203152	0.00239694	0.000184854	0.185459	0.013857	0.322958	8.82e-05	0.0105399	0.0119082	0.000285559	0.0176338	3.93e-05	4.5e-06	0.244148	0.000356749	0.00158361	0.0219571	0.00112834	0.00203122	0.24396	0.000870165	0.243457	0.000225435	0.00363933	0.000882037	0.000430444	0.241256	0.024972	0.00174623	0.0768183	0.0193384	0.00012745	0.00692956	0.00127099	0
Neuroticism_1	0.00321163	0.11188	0.0245379	0.116719	6.35e-13	0.0377732	0.0631458	0.235026	0.0497256	0.050728	0.0227729	0.0451397	0.0519004	0.0407518	0.00403797	0.00382603	0.0976899	0.297057	0.251106	0.0788588	0.00196781	0.0111644	0.0459803	0.168938	0.468114	0.00214144	0.14284	0.00887324	0.0206339	0.00196357	0.132736	0.0646173	0.0110471	0.135175	0.00705094	0.0156563	0.0384476	0.0721942	0.0310287	0.0103019	0.434317	0.45048	0.0978056	0.0228098	0.00584663	0.000595502	0.0854328	0.116006	0.0381616
Neuroticism_2	0.449297	0.346395	0.000944117	0.371775	0.329331	0.48865	0.18457	0.422247	0.207305	0.0540233	0.35256	0.148775	0.00802556	2.08e-05	2e-08	0.0182975	5.19e-05	0.156625	0.35263	0.00859155	0.164425	0.0340492	0.0855431	0.0364506	0.173662	0.0531887	0.371395	4.02e-82	0.00820533	0.119573	1.79e-07	0.241679	0.00144244	2.04e-08	0.0216028	0.0129966	0.00171909	0.100018	0.258846	0.0013691	0.389974	0.00419025	0.151491	0.0847374	0.0940828	7.98e-06	0.193739	0.180231	0.0431797
Osteoporosis_1	0.00773292	0.330419	0.000981641	0.271353	0.00671046	0.0288359	0.0108382	0.019614	4.19e-06	0.293539	0.00115273	0.0431121	0.000246497	0.0300004	7.84e-09	0.0109773	0.00041496	0.00345486	0.108496	0.000115869	0.0390011	4.69e-05	0.000341296	0.000114864	0.00302856	0.00921759	1.51e-05	0.0421526	0.000465435	0.0467777	1.27e-05	0.0180809	0.00555437	0.272715	0.00441976	0.0196815	0.00329389	0.00100212	0.00424747	1.29e-06	0.00794651	2.11e-16	0.0872005	0.00052756	0.0110036	0.0418431	0.186159	0.00389965	0.00400786
Osteoporosis_2	0.349253	0.0985184	0.330939	0.416656	0.394949	0.477993	0.205508	0.102766	0.24476	0.125269	0.486079	0.132047	0.34305	0.471961	0.00589966	0.440883	0.350983	0.443336	0.0047753	0.0178896	0.291459	0.0357529	0.474831	0.0484143	0.0690229	0.382531	0.0133313	0.288952	0.365326	0.394405	0.0957525	0.107437	0.148401	0.352354	0.266829	0.45014	0.420123	0.247346	0.146556	0.092378	0.204377	4.99e-06	0.475634	0.472439	0.431029	0.365602	0.356524	0.171037	0.472978
Pancreatic Cancer	0.000590171	0.00409193	0.205303	0.149251	0.0575153	0.000764586	1.84e-06	0.349468	0.0354629	0.254281	0.154036	0.00171303	0.00325817	0.106174	0.00441862	0.0139832	7.5e-05	0.0150259	0.0980542	0.467626	0.0322316	0.0251609	0.035696	0.0621467	0.0142725	0.00173967	0.00010453	0.189478	0.0257418	0.023433	0.00561449	0.000762591	0.00299083	0.199577	0.00947563	0.00883947	0.00521574	0.000546162	0.000314638	0.00318735	0.0887159	0.0186649	0.000729492	0.0441111	0.00211873	0.0112588	0.0497106	0.066576	0.00931438
Parkinson	0.00825033	0.0103419	0.0116489	0.335127	0.00574234	6.15e-05	0.00365746	0.487176	0.00182796	0.230013	2.36e-05	0.143369	0.00503676	0.0487018	0.025929	0.00522716	0.000325336	0.0395285	0.0010443	0.0810194	0.00031672	0.0345411	0.00736023	0.167765	0.0532795	0.00189773	1.42e-06	0.0258942	0.0174274	0.000501563	0.0444408	0.0310064	5.6e-05	0.0919339	0.000358014	0.00017629	0.000539847	0.000672041	0.000477057	0.163322	0.0108245	0.167984	0.00845785	0.0209888	0.00192104	0.00631077	0.0118995	0.0211991	5e-05
Prostate Cancer	0.345414	0.00101112	0.364577	0.292858	0.198783	0.000518649	0.170511	0.169568	0.147938	1.93e-07	0.0359898	0.0161597	0.492362	0.268865	0.0138457	0.4569	0.377124	0.0163025	2.76e-75	0.00616046	0.00146983	0.27183	0.30631	0.0473901	0.0327391	0.000195898	0.0239769	0.111632	0.453072	0.0133279	0.0719463	0.00908565	0.0766369	0.316629	8.06e-14	0.0253632	0.481072	0.00592502	0.000383095	0.0667495	0.0038714	0.432987	0.00160494	0.108994	0.108294	4.34e-05	1.02e-14	0.0308937	0.00745755
Pubertal Growth Late Adolescence	0.225853	0.0213474	0.00129969	0.345205	0.152952	0.0201729	0.0107669	0.232743	6.93e-07	0.331836	0.0601798	0.0322171	0.277275	0.163373	1.8e-07	0.0989024	0.0301704	0.00628499	0.185483	0.228672	0.0344239	0.0118393	7.27e-05	0.0652867	0.0139753	0.031119	0.005709	0.281927	0.0595567	0.0136898	0.0242781	0.0360884	0.0229788	0.212981	0.00113875	0.00319023	0.0218751	0.00100815	0.023525	0.000759989	0.0937472	1.41e-27	0.016957	4.35e-05	0.0423543	0.040512	0.0857628	0.0432235	0.0210858
Rheumatoid Arthritis	0.0294186	0.216943	0.255772	0.0195277	0.200344	0.167116	0.00716589	0.123023	0.118425	0.261273	0.230879	0.0281574	0.0240139	0.274043	8.01e-06	0.0323058	0.000628082	0.196956	0.0222968	0.217021	0.406195	0.137276	0.000323249	0.00131832	0.162554	0.0957478	3.79e-10	0.125101	0.301708	0.205053	0.135052	0.218966	0.00327077	0.267567	0.388053	0.430349	0.00101162	0.147269	0.18636	0.0202077	0.186969	2.83e-05	0.356347	0.0055231	0.119617	0.0426951	0.349519	0.370374	0.198494
Schizophrenia_1	0.148787	0.450606	0.00328142	0.00421894	0.0587914	0.37798	3.69e-05	0.00590807	0.000905413	0.446252	0.0813778	0.0131363	4.97e-06	0.00177986	1.68e-19	4.16e-13	6.36e-182	0.176427	8.97e-06	0.000363631	0.112288	0.0110841	0.25362	3.8e-05	0.0603231	0.0779472	0.0163484	1.7e-05	0.0476916	0.286314	2.24e-07	0.345976	2.26e-07	0.0584083	0.0848051	0.100698	1.14e-96	0.0106677	0.184282	0.0109188	0.108932	2.58e-13	0.15988	0.194927	0.0366888	0.225003	0.241001	0.253929	0.033277
Schizophrenia_2	0.000413604	0.00348383	0.0100378	0.0371386	0.0325608	0.00257879	0.000140157	0.223202	0.017771	0.23372	0.0109713	0.0081727	0.0063957	0.265372	0.00201286	0.00481567	0.0022851	0.0160332	0.226441	0.144188	0.060506	0.0865691	0.0137856	0.00951852	0.00388901	0.00370227	0.0103023	0.23638	0.0167895	0.025624	0.0888252	0.014106	0.00107774	0.277969	0.0128198	0.0205793	0.000360965	0.00765155	0.00285563	0.0908722	0.249524	0.0017208	0.000771245	0.0182071	0.052729	0.0650917	0.156409	0.0124747	0.0466628
Smoking Age Onset	0.0723096	0.128471	0.352888	0.196056	0.0175307	0.00933721	5.78e-05	0.435252	0.0124219	0.401897	0.0307009	0.022135	0.0228148	0.0886436	0.0197486	0.0432727	0.072462	0.053549	0.129994	0.243594	0.0013339	0.109192	0.0584789	0.00447364	0.222499	0.0969311	0.373829	0.203869	0.0312362	0.0264573	0.164753	0.0226689	0.00747598	0.289916	0.0169464	0.244728	0.161733	0.0473961	0.0282448	0.0964249	0.359322	0.00288539	0.18893	0.102259	0.072624	0.0312456	0.44763	0.0322413	0.00181971
Smoking Cigar Per Day	0.00029622	0.133087	0.0699472	0.424815	0.031078	0.0302134	0.19235	0.0904432	0.216518	0.489859	0.000585795	0.221057	0.0109192	0.150754	0.00802483	0.0994704	0.0543694	0.00678596	0.0278974	0.141622	0.178413	0.0879422	0.189865	0.450758	0.111961	0.0897502	0.229741	0.238765	0.0908868	0.0361993	0.00847445	0.278342	0.0692707	0.186354	0.0404939	0.147862	0.118336	0.148651	0.12532	0.056006	0.0201099	0.0455665	0.0920053	0.147792	0.185177	0.055276	0.255444	0.17609	0.286609
Smoking Ever Smoke	0.0730741	0.0312218	0.00431264	0.32776	0.0268593	0.00362175	0.185995	0.318171	0.00044324	0.0548093	0.0711405	0.00403281	0.0204004	0.0135615	0.0134217	0.0854002	0.00631602	0.0903238	1.47e-05	0.213198	0.0666577	0.0151001	0.0307788	0.238585	0.153175	0.000373894	0.00262806	0.0885562	0.029171	0.0315249	0.0656997	0.0736574	0.0366815	0.465091	0.0228329	0.0228024	0.0142431	0.00967058	0.0235675	0.0587532	0.00508541	0.0145909	0.0191112	0.016361	0.245702	0.00084176	0.0979304	0.0325102	0.0250584
Smoking Former Smoker	0.0196353	0.0776215	0.0175131	0.400824	0.0296355	0.083543	0.038161	0.0277395	0.00333048	0.053163	0.0433458	0.00971347	7.47e-05	0.0519292	0.00716215	0.0830945	0.0062974	0.106628	0.368102	0.43113	0.0509392	0.0145085	0.114436	0.0062445	0.378312	0.000107901	0.128393	0.205078	0.00759122	0.0490721	0.0014763	0.0150197	0.00219176	0.327911	0.00919538	0.12298	0.00336594	0.000248855	0.0198675	0.00613265	0.00496403	0.00013048	0.0104364	0.0391036	0.156196	0.0359777	0.192014	0.0674864	0.0337115
Systolic Blood Pressure	0.00103644	0.340176	0.015393	0.293986	0.0898551	0.0330555	0.109111	0.223828	0.264573	0.421366	0.0476084	0.197649	0.000130918	0.00240183	2.9e-09	0.00495459	7.74e-05	0.0171803	0.284911	0.0285807	0.0355702	8.13e-06	0.00018275	3.23e-05	0.000816176	0.00108202	0.00378093	0.0744418	0.0168699	0.00508976	0	0.331966	0.00243775	0.0759723	0.00696381	0.00387707	0.000592269	0.000892006	0.00385306	8.54e-06	0.00205122	1.6e-07	0.0587496	4.46e-05	0.00733693	0.0397139	0.340649	0.308024	0.0575916
Triglycerides	0.279875	0.0621522	7.59e-07	0.0691335	0.0379733	0.00147364	0.0324693	0.0278486	0.000669419	0.189233	0.0355424	0.0362501	0.158649	0.147733	5.88e-17	2.72e-05	0.00391458	0.0212215	0.0161561	0.114526	0.0155374	0.0056615	1.42e-81	8.05e-08	0.187275	0.00232102	4.07e-07	0.000522156	1.3e-09	9.83e-05	6.55e-05	0.0321572	0.000345936	0.0301096	1.04e-14	0.0107575	0.0225083	0.0192014	0.00249164	4.29e-167	0.00831007	1.6e-08	0.0405145	1.17e-43	0.00113085	2.75e-05	0.085727	0.0684726	0.0212
Ulcerative Colitis	0.186804	0.112285	0.0157278	0.312973	0.172531	0.0471583	0.0389389	0.156332	0.422949	0.0530064	0.439522	0.246382	0.132606	0.400468	0.0742609	0.115585	0.159548	0.471729	0.0965562	0.0116826	0.353554	0.42051	0.0359823	0.176899	0.303235	0.49639	5.07e-34	0.422837	0.365945	0.466266	0.247943	0.425063	0.0156633	0.315294	0.0554496	0.424375	0.136288	0.385338	0.245913	0.0656925	0.372073	0.00268654	0.197839	0.119889	0.27272	0.231886	0.428122	0.370725	0.440362
Upper Gastrointestinal Cancer	0.0209184	0.000138368	0.0599157	0.327394	0.0109032	0.0219481	0.0122191	0.430889	0.0298323	0.023836	0.00243532	0.00439765	0.154381	0.116159	0.248417	0.0177225	0.190842	0.224391	1.22e-09	0.0976049	0.0151296	0.0150074	0.0168335	0.313201	0.264762	0.000228185	0.00204742	0.257411	0.0126295	0.000202735	0.0232906	0.00790553	0.00198472	0.299023	0.00230919	0.00725119	0.102242	0.036711	0.00353188	0.0211517	0.0259649	0.318549	0.00192395	0.0939675	0.045538	3.09e-05	0.00036995	0.00318547	0.000688827
Waist-Hip Ratio Adjusted For Bmi	0.0346911	0.0429643	0.000149869	0.213321	0.0055243	0.00836264	0.00202279	0.349039	0.00202503	0.17012	0.00357996	0.0417654	0.000408866	0.0242995	7.62e-05	0.00545508	0.0149454	0.00415035	0.0485268	0.0418995	0.012531	0.00290072	6.09e-06	6.94e-05	0.0500206	0.000195598	5.41e-06	0.0854181	0.000233071	0.000610156	0.000269754	0.000367637	0.000615606	0.106	1.24e-05	0.0224111	0.00597716	0.000423076	2e-05	1.24e-09	0.0120944	4.7e-12	0.00108168	0.000671386	0.0163909	0.000323068	0.0137818	0.00969332	0.0052098
[truncated: 20 more columns]
