# Supplementary material for: Identifying the genetic basis and molecular mechanisms underlying phenotypic correlation between complex human traits using a gene-based approach
Source: Research Square preprint supplement (doi:10.21203/rs.3.rs-108940/v1), 2020-12-02
Supplement: Supplementary file 2 [file 5593b09eaf54c5946d943d47.xlsx]

## Sheet: Sheet1
disease_name			data_link
Acute Lymphoblastoid Leukemia			https://pubmed.ncbi.nlm.nih.gov/23334668/
Age At Menarche			https://pubmed.ncbi.nlm.nih.gov/25231870
Age Related Macular Degeneration			https://pubmed.ncbi.nlm.nih.gov/26691988
Agreeableness			https://pubmed.ncbi.nlm.nih.gov/21173776/
Alcoholism			https://www.ncbi.nlm.nih.gov/projects/gap/cgi-bin/analysis.cgi?study_id=phs000125.v1.p1&phv=44675&phd=1152&pha=2892&pht=319&phvf=&phdf=&phaf=&phtf=&dssp=1&consent=&temp=1
AD_1			https://pubmed.ncbi.nlm.nih.gov/17998437
AD_2			https://pubmed.ncbi.nlm.nih.gov/24162737
AD_3			https://pubmed.ncbi.nlm.nih.gov/21460841
AD_4			https://pubmed.ncbi.nlm.nih.gov/25188341
Anorexia Nervosa			http://www.ncbi.nlm.nih.gov/pubmed/24514567
Asthma			https://pubmed.ncbi.nlm.nih.gov/21804549/
ADHD			https://pubmed.ncbi.nlm.nih.gov/20732625/
Autism_1			https://pubmed.ncbi.nlm.nih.gov/23453885
Autism_2			https://pubmed.ncbi.nlm.nih.gov/28540026
Bipolar Disorder			https://pubmed.ncbi.nlm.nih.gov/21926972/
Bipolar Disorder And Schizophrenia			http://www.ncbi.nlm.nih.gov/pubmed/24280982
Birth Weight			https://pubmed.ncbi.nlm.nih.gov/23202124/
BMI			https://pubmed.ncbi.nlm.nih.gov/25673413/
Breast Cancer_1			https://pubmed.ncbi.nlm.nih.gov/ 17903305
Breast Cancer_2			https://pubmed.ncbi.nlm.nih.gov/29059683
Childhood Intelligence			http://www.ncbi.nlm.nih.gov/pubmed/25201988
Childhood Obesity			https://pubmed.ncbi.nlm.nih.gov/22484627/
Cholesterol			http://www.ncbi.nlm.nih.gov/pubmed/24097068
Chronic Kidney Disease_1			https://pubmed.ncbi.nlm.nih.gov/20383146
Chronic Kidney Disease_2			https://pubmed.ncbi.nlm.nih.gov/21355061
Coronary Artery Disease			https://pubmed.ncbi.nlm.nih.gov/26343387/
Crohn Disease			https://pubmed.ncbi.nlm.nih.gov/21102463/
Depressive			https://pubmed.ncbi.nlm.nih.gov/27089181/
Diabetes_1			https://pubmed.ncbi.nlm.nih.gov/22885922
Diabetes_2			https://pubmed.ncbi.nlm.nih.gov/18372903
Diastolic Blood Pressure			https://pubmed.ncbi.nlm.nih.gov/21378095/
Early Growth			https://pubmed.ncbi.nlm.nih.gov/24770850/
Education Attainment - College			http://www.ncbi.nlm.nih.gov/pubmed/23722424
Extraversion			https://pubmed.ncbi.nlm.nih.gov/24828478/
Fasting Glucose			https://pubmed.ncbi.nlm.nih.gov/22885924/
Fasting Insulin			https://pubmed.ncbi.nlm.nih.gov/21873549/
Five Psychiatric Diseases			https://pubmed.ncbi.nlm.nih.gov/23453885/
Glaucoma			https://www.ncbi.nlm.nih.gov/pubmed/27064256
Glioma			https://www.ncbi.nlm.nih.gov/projects/gap/cgi-bin/analysis.cgi?study_id=phs000652.v1.p1&pha=3836
Head Circumference			https://pubmed.ncbi.nlm.nih.gov/22504419/
Height			https://pubmed.ncbi.nlm.nih.gov/25282103/
HDL			http://www.ncbi.nlm.nih.gov/pubmed/24097068
Juvenile Arthritis			https://pubmed.ncbi.nlm.nih.gov/24974057/
Longevity_1			https://pubmed.ncbi.nlm.nih.gov/24688116
Longevity_2			https://pubmed.ncbi.nlm.nih.gov/22279548
LDL			http://www.ncbi.nlm.nih.gov/pubmed/24097068
Lung Cancer			https://www.ncbi.nlm.nih.gov/projects/gap/cgi-bin/dataset.cgi?study_id=phs000716.v1.p1&phv=200112&phd=&pha=3851&pht=3708&phvf=&phdf=&phaf=&phtf=&dssp=1&consent=&temp=1
Metformin			data from UCSF professor Kathy Giacomini https://pharmacy.ucsf.edu/kathy-giacomini
Neuroblastoma			https://www.ncbi.nlm.nih.gov/projects/gap/cgi-bin/analysis.cgi?study_id=phs000124.v2.p1&pha=2895
Neuroticism_1			https://pubmed.ncbi.nlm.nih.gov/21173776
Neuroticism_2			https://pubmed.ncbi.nlm.nih.gov/27089181
Osteoporosis_1			https://pubmed.ncbi.nlm.nih.gov/22805710
Osteoporosis_2			https://pubmed.ncbi.nlm.nih.gov/26367794
Pancreatic Cancer			https://www.ncbi.nlm.nih.gov/projects/gap/cgi-bin/analysis.cgi?study_id=phs000206.v5.p3&pha=2874
Parkinson			https://www.ncbi.nlm.nih.gov/projects/gap/cgi-bin/analysis.cgi?study_id=phs000089.v3.p2&pha=2868
Prostate Cancer			NCBI dbGaP analysis accession: pha001340
Pubertal Growth Late Adolescence			https://pubmed.ncbi.nlm.nih.gov/23449627/
Rheumatoid Arthritis			https://pubmed.ncbi.nlm.nih.gov/24390342/
Schizophrenia_1			https://pubmed.ncbi.nlm.nih.gov/25056061
Schizophrenia_2			NCBI dbGaP analysis accession:PHA002859
Smoking Age Onset			https://pubmed.ncbi.nlm.nih.gov/20418890/
Smoking Cigar Per Day			https://pubmed.ncbi.nlm.nih.gov/20418890/
Smoking Ever Smoke			https://pubmed.ncbi.nlm.nih.gov/20418890/
Smoking Former Smoker			https://pubmed.ncbi.nlm.nih.gov/20418890/
Systolic Blood Pressure			https://pubmed.ncbi.nlm.nih.gov/21378095/
Triglycerides			http://www.ncbi.nlm.nih.gov/pubmed/24097068
Ulcerative Colitis			https://pubmed.ncbi.nlm.nih.gov/26192919/
Upper Gastrointestinal Cancer			https://www.ncbi.nlm.nih.gov/projects/gap/cgi-bin/analysis.cgi?study_id=phs000361.v1.p1&pha=3106
Waist-Hip Ratio Adjusted For Bmi			https://pubmed.ncbi.nlm.nih.gov/20732625/
