# Supplementary material for: Identifying the genetic basis and molecular mechanisms underlying phenotypic correlation between complex human traits using a gene-based approach
Source: Research Square preprint supplement (doi:10.21203/rs.3.rs-108940/v1), 2020-12-02
Supplement: Supplementary file 3 [file b0bd15e24410a8f095245daa.xlsx]

## Sheet: genes (q<=0.1)
	disease	GWAS	gene	gene_id	pval	qval
0	Age At Menarche	Menarche_iCOG_Nature2014_Meta	LIN28B-AS1	3505241	2.92e-07	0.00916
1	Age At Menarche	Menarche_iCOG_Nature2014_Meta	SALL4P7	3505264	6.37e-07	0.00999
2	Age At Menarche	Menarche_iCOG_Nature2014_Meta	RP11-419C5.2	3505290	1.23e-06	0.0129
3	Age At Menarche	Menarche_iCOG_Nature2014_Meta	RP3-523K23.2	3505314	2.05e-06	0.0133
4	Age At Menarche	Menarche_iCOG_Nature2014_Meta	RHOA	3505337	2.55e-06	0.0133
5	Age At Menarche	Menarche_iCOG_Nature2014_Meta	SATB2	3505364	2.55e-06	0.0133
6	Age At Menarche	Menarche_iCOG_Nature2014_Meta	RNF123	3505384	9.72e-06	0.0436
7	Age At Menarche	Menarche_iCOG_Nature2014_Meta	IP6K1	3505397	1.22e-05	0.048
8	Age At Menarche	Menarche_Nature2014_Meta	SALL4P7	10503523	4.85e-07	0.00835
9	Age At Menarche	Menarche_Nature2014_Meta	SATB2	10503543	5.33e-07	0.00835
10	Age At Menarche	Menarche_Nature2014_Meta	RP11-419C5.2	10503559	7.99e-07	0.00835
11	Age At Menarche	Menarche_Nature2014_Meta	RP3-523K23.2	10503577	1.78e-06	0.0139
12	Age At Menarche	Menarche_Nature2014_Meta	RHOA	10503586	3.87e-06	0.0223
13	Age At Menarche	Menarche_Nature2014_Meta	LIN28B-AS1	10503593	4.26e-06	0.0223
14	Age At Menarche	Menarche_Nature2014_Meta	IP6K1	10503596	1.38e-05	0.062
15	Age Related Macular Degeneration	AMD_Fritsche_2015	CFHR3	5377418	7.01e-12	2.25e-07
16	Age Related Macular Degeneration	AMD_Fritsche_2015	CFH	5377437	1.74e-07	0.00186
17	Age Related Macular Degeneration	AMD_Fritsche_2015	CFHR1	5377461	4.75e-07	0.00382
18	Age Related Macular Degeneration	AMD_Fritsche_2015	CFHR4	5377473	1e-05	0.043
19	Age Related Macular Degeneration	AMD_Fritsche_2015	KCNT2	5529181	3.58e-06	0.0192
20	Age Related Macular Degeneration	AMD_Fritsche_2015	LHX9	5541358	2.11e-05	0.0755
21	Age Related Macular Degeneration	AMD_Fritsche_2015	PLEKHA1	5624241	3.15e-10	5.06e-06
22	Age Related Macular Degeneration	AMD_Fritsche_2015	STAG3L5P	5714091	1.07e-05	0.043
23	Age Related Macular Degeneration	AMD_Fritsche_2015	ZBTB41	5764699	7.47e-07	0.0048
24	Age Related Macular Degeneration	AMDGene2013_Advanced	CFH	4470240	7.53e-07	0.0117
25	Age Related Macular Degeneration	AMDGene2013_Advanced	PLEKHA1	4578661	3.88e-08	0.00121
26	Age Related Macular Degeneration	AMDGene2013_GeographicAtropy	CFH	2322925	4.42e-07	0.0138
27	Age Related Macular Degeneration	AMDGene2013_GeographicAtropy	KCNT2	2322932	1.21e-06	0.0189
28	Age Related Macular Degeneration	AMDGene2013_GeographicAtropy	PLEKHA1	2322945	2.18e-06	0.0228
29	Age Related Macular Degeneration	AMDGene2013_GeographicAtropy	SMU1	2322957	6.53e-06	0.0511
30	Age Related Macular Degeneration	AMDGene2013_Neovascular	CFH	4410055	2.91e-07	0.0091
31	Age Related Macular Degeneration	AMDGene2013_Neovascular	PLEKHA1	4410071	8.46e-07	0.0132
32	Alzheimer's Disease (AD)	ADGC_2011_unadj_stage1	CTB-171A8.1	11283478	5.98e-09	0.000185
33	Alzheimer's Disease (AD)	ADGC_2011_unadj_stage1	APOE	11283495	3.13e-07	0.00485
34	Alzheimer's Disease (AD)	Alzheimer_IGAP	CEACAM19	15158699	4.65e-09	9.96e-05
35	Alzheimer's Disease (AD)	Alzheimer_IGAP	APOE	15158700	6.2e-09	9.96e-05
36	Alzheimer's Disease (AD)	Alzheimer_IGAP	CTB-171A8.1	15158701	1.91e-08	0.000204
37	Alzheimer's Disease (AD)	Alzheimer_IGAP	AC074212.5	15158702	4.96e-07	0.00399
38	Alzheimer's Disease (AD)	Alzheimer_IGAP	EML2	15158703	2.07e-06	0.0133
39	Alzheimer's Disease (AD)	Alzheimer_IGAP	MARK4	15158704	2.58e-06	0.0138
40	Alzheimer's Disease (AD)	Alzheimer_IGAP	PTK2B	15158705	3.08e-06	0.0141
41	Alzheimer's Disease (AD)	Alzheimer_IGAP	PPP1R37	15158706	7.16e-06	0.0288
42	Alzheimer's Disease (AD)	Alzheimer_IGAP	CLASRP	15158707	1.24e-05	0.0442
43	Alzheimer's Disease (AD)	Alzheimer_IGAP	RP11-15A1.3	15158708	1.75e-05	0.0562
44	Alzheimer's Disease (AD)	Alzheimer_IGAP	CR1	15158709	2.48e-05	0.0724
45	Alzheimer's Disease (AD)	Alzheimer_IGAP	NKPD1	15158710	3.24e-05	0.0771
46	Alzheimer's Disease (AD)	Alzheimer_IGAP	ZNF226	15158711	3.31e-05	0.0771
47	Alzheimer's Disease (AD)	Alzheimer_IGAP	KLC3	15158712	3.36e-05	0.0771
48	Alzheimer's Disease (AD)	Alzheimer_IGAP	ERCC2	15158713	4.63e-05	0.0992
49	Alzheimer's Disease (AD)	Alzheimer_Neuropathologic_Neuritic_np_status_relax	SV2B	9661969	4.85e-08	0.00155
50	Alzheimer's Disease (AD)	Alzheimer_Neuropathologic_Neuritic_np_status_relax	APOE	9661994	1.76e-07	0.00281
51	Alzheimer's Disease (AD)	Alzheimer_Neuropathologic_Neuritic_np_status_relax	CTB-171A8.1	9662003	2.23e-06	0.0237
52	Alzheimer's Disease (AD)	Alzheimer_Neuropathologic_Neuritic_np_status_relax	SYT4	9662025	3.77e-06	0.0302
53	Alzheimer's Disease (AD)	Alzheimer_Neuropathologic_Neuritic_ord	APOE	12102828	2.18e-07	0.00698
54	Alzheimer's Disease (AD)	Alzheimer_Neuropathologic_NFT_4	APOE	9133008	9.87e-07	0.0316
55	Alzheimer's Disease (AD)	Alzheimer_Neuropathologic_NFT_7	APOE	9495496	3.84e-07	0.0123
56	Alzheimer's Disease (AD)	Alzheimer_Neuropathologic_status	APOE	8750201	1.17e-07	0.00375
57	Alzheimer's Disease (AD)	Alzheimer_Neuropathologic_status	CTB-171A8.1	8750213	3.63e-06	0.0581
58	Alzheimer's Disease (AD)	Alzheimer_pha002879	FAM151A	636166	2.27e-07	0.00404
59	Alzheimer's Disease (AD)	Alzheimer_pha002879	GPR135	636203	2.73e-07	0.00404
60	Alzheimer's Disease (AD)	Alzheimer_pha002879	L3HYPDH	636242	6.9e-06	0.0681
61	Anorexia Nervosa	Anorexia_nervosa_GCAN	PP2D1	5202589	1.86e-06	0.0575
62	Asthma	GALA2_12_Asthma_HM	CACNB1	4449314	2.46e-06	0.0398
63	Asthma	GALA2_12_Asthma_HM	GSDMB	4449327	2.57e-06	0.0398
64	Asthma	GALA2_12_Asthma_HM	PNMT	4449370	7.57e-06	0.0781
65	Autism	PGC.cross.AUT8_2013	ENPP4	7873241	4.91e-08	0.00153
66	Autism	daner_AUT_meta_CEU	ENPP4	1371150	2.73e-06	0.0866
67	Autism	daner_AUT_meta_WorldWide	ENPP4	8478389	1.76e-07	0.0056
68	Autism	daner_AUT_meta_WorldWide	RP1-8B1.4	8478395	3.83e-06	0.0609
69	Autism	daner_AUT_meta_WorldWild_noswedish	ENPP4	781946	4.33e-07	0.0137
70	Autism	daner_AUT_meta_WorldWild_noswedish	MTMR9	781952	5.2e-06	0.0825
71	Autism	AUT_pha003611_High-IQ_Paternal_Stage-1_All	RP5-837J1.2	2408636	1.05e-06	0.0327
72	Autism	AUT_pha003620_Spectrum-Autism_Paternal_Stage-1_All	UBE2Q2P1	8726463	2.61e-06	0.0805
73	Autism	AUT_pha003620_Spectrum-Autism_Paternal_Stage-1_All	MAPT	8726654	5.2e-06	0.0805
74	Autism	AUT_pha003629_High-IQ_Paternal_Stage-1_Eur	RP5-837J1.2	8175062	4.57e-07	0.0142
75	Autism	AUT_pha003672_Spectrum-Autism_Additive_Stage-2_Eur	MTHFR	9977214	1.79e-06	0.0557
76	Autism	AUT_pha003692_Spectrum-Autism_Paternal_Stage-1-and-2_All	SGK1	45595	3.49e-06	0.0794
77	Autism	AUT_pha003692_Spectrum-Autism_Paternal_Stage-1-and-2_All	YEATS2-AS1	45607	5.12e-06	0.0794
78	Autism	AUT_pha003695_Strict-Autism_Paternal_Stage-1-and-2_All	SGK1	47220	2.78e-06	0.0863
79	Autism	AUT_pha003723_Phrase_Additive_Stage-1_All	LEPR	1689980	1.28e-06	0.0398
80	Autism	AUT_pha003729_Phrase_Additive_Stage-2_All	IL20RB	11641854	2.54e-07	0.00789
81	Autism	AUT_pha003729_Phrase_Additive_Stage-2_All	RP11-358M14.2	11641878	6.33e-06	0.0769
82	Autism	AUT_pha003729_Phrase_Additive_Stage-2_All	RRP12	11641902	7.43e-06	0.0769
83	Autism	AUT_pha003730_Phrase_Dominant_Stage-2_All	IL20RB	3964057	3.92e-07	0.0122
84	Autism	AUT_pha003730_Phrase_Dominant_Stage-2_All	RP11-358M14.2	3964063	6.33e-06	0.0982
85	Autism	AUT_pha003733_Word_Dominant_Stage-2_All	BNIPL	4429219	1.54e-06	0.0476
86	Bipolar Disorder	PGC.BIPolar_2012	CACNB3	2571375	2.14e-08	0.000671
87	Bipolar Disorder	PGC.BIPolar_2012	DDN	2571393	1.6e-06	0.0251
88	Bipolar Disorder	PGC.BIPolar_2012	LMAN2L	2571404	1e-05	0.0992
89	Bipolar Disorder	PGC.BIPolar_2012	ITIH4	2571417	1.37e-05	0.0992
90	Bipolar Disorder	PGC.BIPolar_2012	SLC7A6	2571421	1.58e-05	0.0992
91	Bipolar Disorder And Schizophrenia	PGC.BPSCZ	MARCKSL1P1	11790495	1.09e-07	0.00341
92	Bipolar Disorder And Schizophrenia	PGC.BPSCZ	ARL3	11790514	6.68e-07	0.0104
93	Bipolar Disorder And Schizophrenia	PGC.BPSCZ	BTN3A2	11790622	1.17e-06	0.0122
94	Bipolar Disorder And Schizophrenia	PGC.BPSCZ	ATP5MD	11790644	2.62e-06	0.0205
95	Bipolar Disorder And Schizophrenia	PGC.BPSCZ	NT5C2	11790667	6.75e-06	0.0422
96	Bipolar Disorder And Schizophrenia	PGC.BPSCZ	ITIH4	11790702	1.26e-05	0.0656
97	Bipolar Disorder And Schizophrenia	PGC.BPSCZ	DDN	11790765	1.69e-05	0.0744
98	Bipolar Disorder And Schizophrenia	PGC.BPSCZ	BTN1A1	11790773	1.9e-05	0.0744
99	Bipolar Disorder And Schizophrenia	PGC.BPSCZ	MCHR1	11790826	2.49e-05	0.0865
100	Bipolar Disorder And Schizophrenia	PGC.BPSCZ	FRMD7	11790842	2.93e-05	0.0918
101	Bipolar Disorder And Schizophrenia	PGC.BPSCZ_BP_only	CACNB3	6301664	2.85e-08	0.000892
102	Bipolar Disorder And Schizophrenia	PGC.BPSCZ_BP_only	DDN	6301704	5.11e-06	0.0663
103	Bipolar Disorder And Schizophrenia	PGC.BPSCZ_BP_only	RCE1	6301726	6.35e-06	0.0663
104	Bipolar Disorder And Schizophrenia	PGC.BPSCZ_BP_only	MVP	6301734	1.26e-05	0.0873
105	Bipolar Disorder And Schizophrenia	PGC.BPSCZ_BP_only	CTSF	6301751	1.6e-05	0.0873
106	Bipolar Disorder And Schizophrenia	PGC.BPSCZ_BP_only	WFDC12	6301760	1.93e-05	0.0873
107	Bipolar Disorder And Schizophrenia	PGC.BPSCZ_BP_only	CCDC36	6301772	1.95e-05	0.0873
108	Bipolar Disorder And Schizophrenia	PGC.BPSCZ_BP_vs_SCZ	ARL17A	47530	3.71e-07	0.0116
109	Bipolar Disorder And Schizophrenia	PGC.BPSCZ_BP_vs_SCZ	RP11-501C14.9	47555	5.07e-06	0.0792
110	Bipolar Disorder And Schizophrenia	PGC.BPSCZ_BP_vs_SCZ	RP11-259G18.2	47767	9.14e-06	0.0951
111	Bipolar Disorder And Schizophrenia	PGC.BPSCZ_SCZ_only	BTN3A2	3010465	4.11e-11	1.29e-06
112	Bipolar Disorder And Schizophrenia	PGC.BPSCZ_SCZ_only	MARCKSL1P1	3010490	1.24e-07	0.00194
113	Bipolar Disorder And Schizophrenia	PGC.BPSCZ_SCZ_only	BTN1A1	3010506	2.03e-07	0.00212
114	Bipolar Disorder And Schizophrenia	PGC.BPSCZ_SCZ_only	NT5C2	3010559	6.29e-07	0.00492
115	Bipolar Disorder And Schizophrenia	PGC.BPSCZ_SCZ_only	ARL3	3010580	3.19e-06	0.0199
116	Bipolar Disorder And Schizophrenia	PGC.BPSCZ_SCZ_only	HIST1H4C	3010605	5.6e-06	0.0292
117	Bipolar Disorder And Schizophrenia	PGC.BPSCZ_SCZ_only	ATP5MD	3010628	1.32e-05	0.0591
118	Birth Length	EGG_Birth_Length	ZBTB7B	13086412	3.02e-06	0.0937
119	Body Mass Index	GIANT_2015_All_mc_merge_nogc	FUBP1	3557372	2.8e-07	0.00509
120	Body Mass Index	GIANT_2015_All_mc_merge_nogc	PMS2P3	3557417	3.24e-07	0.00509
121	Body Mass Index	GIANT_2015_All_mc_merge_nogc	NPIPB6	3557444	7.32e-07	0.00583
122	Body Mass Index	GIANT_2015_All_mc_merge_nogc	RP11-1348G14.6	3557453	7.42e-07	0.00583
123	Body Mass Index	GIANT_2015_All_mc_merge_nogc	NPIPB7	3557474	1.18e-06	0.00698
124	Body Mass Index	GIANT_2015_All_mc_merge_nogc	NEGR1	3557482	1.33e-06	0.00698
125	Body Mass Index	GIANT_2015_All_mc_merge_nogc	CDC37P1	3557492	2.31e-06	0.0104
126	Body Mass Index	GIANT_2015_All_mc_merge_nogc	NUPR1	3557510	4.06e-06	0.0155
127	Body Mass Index	GIANT_2015_All_mc_merge_nogc	EIF3CL	3557526	4.42e-06	0.0155
128	Body Mass Index	GIANT_2015_All_mc_merge_nogc	TFAP2B	3557536	5.79e-06	0.0182
129	Body Mass Index	GIANT_2015_All_mc_merge_nogc	TUFM	3557549	6.79e-06	0.0194
130	Body Mass Index	GIANT_2015_All_mc_merge_nogc	RP11-22P6.3	3557557	1.11e-05	0.0291
131	Body Mass Index	GIANT_2015_All_mc_merge_nogc	NFATC2IP	3557571	1.54e-05	0.0372
132	Body Mass Index	GIANT_2015_All_mc_merge_nogc	UHRF1BP1	3557605	1.86e-05	0.0419
133	Body Mass Index	GIANT_2015_All_mc_merge_nogc	RP11-509E16.1	3557619	2.21e-05	0.0463
134	Body Mass Index	GIANT_2015_All_mc_merge_nogc	FBXL19	3557629	3.12e-05	0.0596
135	Body Mass Index	GIANT_2015_All_mc_merge_nogc	ADCY3	3557646	3.22e-05	0.0596
136	Body Mass Index	GIANT_2015_All_mc_merge_nogc	TM6SF2	3557670	4.06e-05	0.0709
137	Body Mass Index	GIANT_2015_All_mc_merge_nogc	RBL2	3557699	4.69e-05	0.0777
138	Body Mass Index	GIANT_2015_EUR_mc_merge_nogc	PMS2P3	2699341	3.31e-07	0.00548
139	Body Mass Index	GIANT_2015_EUR_mc_merge_nogc	FUBP1	2699357	3.49e-07	0.00548
140	Body Mass Index	GIANT_2015_EUR_mc_merge_nogc	NEGR1	2699385	1.04e-06	0.00938
141	Body Mass Index	GIANT_2015_EUR_mc_merge_nogc	NPIPB7	2699400	1.19e-06	0.00938
142	Body Mass Index	GIANT_2015_EUR_mc_merge_nogc	RP11-1348G14.6	2699412	1.8e-06	0.00953
143	Body Mass Index	GIANT_2015_EUR_mc_merge_nogc	NPIPB6	2699427	1.82e-06	0.00953
144	Body Mass Index	GIANT_2015_EUR_mc_merge_nogc	EIF3CL	2699437	3.83e-06	0.0154
145	Body Mass Index	GIANT_2015_EUR_mc_merge_nogc	CDC37P1	2699458	3.91e-06	0.0154
146	Body Mass Index	GIANT_2015_EUR_mc_merge_nogc	TFAP2B	2699477	5.56e-06	0.0194
147	Body Mass Index	GIANT_2015_EUR_mc_merge_nogc	NUPR1	2699501	6.49e-06	0.0204
148	Body Mass Index	GIANT_2015_EUR_mc_merge_nogc	TUFM	2699533	7.53e-06	0.0215
149	Body Mass Index	GIANT_2015_EUR_mc_merge_nogc	RP11-22P6.3	2699556	1.03e-05	0.0271
150	Body Mass Index	GIANT_2015_EUR_mc_merge_nogc	NFATC2IP	2699575	1.31e-05	0.0318
151	Body Mass Index	GIANT_2015_EUR_mc_merge_nogc	FBXL19	2699585	2.01e-05	0.0443
152	Body Mass Index	GIANT_2015_EUR_mc_merge_nogc	UHRF1BP1	2699611	2.11e-05	0.0443
153	Body Mass Index	GIANT_2015_EUR_mc_merge_nogc	RP11-509E16.1	2699616	2.51e-05	0.0494
154	Body Mass Index	GIANT_2015_EUR_mc_merge_nogc	ADCY3	2699638	2.73e-05	0.0505
155	Body Mass Index	GIANT_2015_EUR_mc_merge_nogc	RBL2	2699659	3.22e-05	0.0562
156	Body Mass Index	GIANT_2015_Men_mc_merge_nogc	NEGR1	1690339	1.93e-07	0.00606
157	Body Mass Index	GIANT_2015_Men_mc_merge_nogc	CDC37P1	1690348	1.19e-06	0.0187
158	Body Mass Index	GIANT_2015_Men_mc_merge_nogc	NPIPB7	1690354	2.4e-06	0.0251
159	Body Mass Index	GIANT_2015_Men_mc_merge_nogc	EIF3CL	1690358	4.8e-06	0.0377
160	Body Mass Index	GIANT_2015_Men_mc_merge_nogc	TFAP2B	1690367	6.93e-06	0.0429
161	Body Mass Index	GIANT_2015_Men_mc_merge_nogc	PMS2P3	1690380	8.2e-06	0.0429
162	Body Mass Index	GIANT_2015_Men_mc_merge_nogc	TUFM	1690394	1.1e-05	0.0492
163	Body Mass Index	GIANT_2015_Men_mc_merge_nogc	NFATC2IP	1690409	1.46e-05	0.0511
164	Body Mass Index	GIANT_2015_Men_mc_merge_nogc	NPIPB6	1690425	1.63e-05	0.0511
165	Body Mass Index	GIANT_2015_Men_mc_merge_nogc	RP11-1348G14.6	1690441	1.63e-05	0.0511
166	Body Mass Index	GIANT_2015_Men_mc_merge_nogc	RP11-1348G14.4	1690454	1.99e-05	0.0527
167	Body Mass Index	GIANT_2015_Men_mc_merge_nogc	RP11-22P6.3	1690473	2.01e-05	0.0527
168	Body Mass Index	GIANT_2015_Men_mc_merge_nogc	MYBPC3	1690487	3.01e-05	0.0727
169	Body Mass Index	GIANT_2015_Men_mc_merge_nogc	NUPR1	1690501	3.53e-05	0.0792
170	Body Mass Index	GIANT_2015_Men_mc_merge_nogc	RBL2	1690518	4.12e-05	0.0861
171	Body Mass Index	GIANT_2015_Men_mc_merge_nogc	SH2B1	1690538	4.89e-05	0.0959
172	Body Mass Index	GIANT_2015_Women_mc_merge_nogc	NEGR1	1813722	1.22e-06	0.0322
173	Body Mass Index	GIANT_2015_Women_mc_merge_nogc	NPIPB7	1813738	2.05e-06	0.0322
174	Body Mass Index	GIANT_2015_Women_mc_merge_nogc	ADCY3	1813761	3.87e-06	0.0337
175	Body Mass Index	GIANT_2015_Women_mc_merge_nogc	CDC37P1	1813787	4.84e-06	0.0337
176	Body Mass Index	GIANT_2015_Women_mc_merge_nogc	EIF3CL	1813803	5.37e-06	0.0337
177	Body Mass Index	GIANT_2015_Women_mc_merge_nogc	FUBP1	1813826	7.16e-06	0.0375
178	Body Mass Index	GIANT_2015_Women_mc_merge_nogc	NFATC2IP	1813848	1.77e-05	0.0793
179	Body Mass Index	GIANT_2015_Women_mc_merge_nogc	TFAP2B	1813862	2.05e-05	0.0803
180	Body Mass Index	GIANT_BMI_MEN_GT50	NPIPB6	854579	9.16e-07	0.0143
181	Body Mass Index	GIANT_BMI_MEN_GT50	RP11-1348G14.6	854595	9.16e-07	0.0143
182	Body Mass Index	GIANT_BMI_MEN_GT50	DTX2P1	854630	1.86e-06	0.0194
183	Body Mass Index	GIANT_BMI_MEN_GT50	NEGR1	854654	4.18e-06	0.0327
184	Body Mass Index	GIANT_BMI_MEN_GT50	NUPR1	854673	6.41e-06	0.04
185	Body Mass Index	GIANT_BMI_MEN_LE50	NEGR1	12098219	1.77e-06	0.0552
186	Body Mass Index	GIANT_BMI_Speliotes_2010	PMS2P3	1689264	2.85e-07	0.00751
187	Body Mass Index	GIANT_BMI_Speliotes_2010	NEGR1	1689275	4.79e-07	0.00751
188	Body Mass Index	GIANT_BMI_Speliotes_2010	EIF3CL	1689281	2.48e-06	0.0259
189	Body Mass Index	GIANT_BMI_Speliotes_2010	RP11-22P6.3	1689290	3.65e-06	0.0286
190	Body Mass Index	GIANT_BMI_Speliotes_2010	NFATC2IP	1689300	1.08e-05	0.0679
191	Body Mass Index	GIANT_BMI_Speliotes_2010	FUBP1	1689308	1.43e-05	0.0749
192	Body Mass Index	GIANT_BMI_WOMEN_LE50	NEGR1	4314676	5.08e-07	0.0159
193	Body Mass Index	GIANT_BMI_WOMEN_LE50	ADCY3	4314685	3.2e-06	0.05
194	Body Mass Index	GIANT_BMI_WOMEN_LE50	LOC387726	4314687	5.13e-06	0.0534
195	Body Mass Index	GIANT_BMI_WOMEN_LE50	RP11-509E16.1	4314692	6.89e-06	0.0538
196	Body Mass Index	GIANT_BMI_WOMEN_LE50	C1QL2	4314695	9.91e-06	0.0619
197	Body Mass Index	GIANT_Randall2013PlosGenet_BMI_MEN_N	NEGR1	2941244	2.7e-07	0.00857
198	Body Mass Index	GIANT_Randall2013PlosGenet_BMI_MEN_N	HCN4	2941314	3.02e-06	0.0479
199	Body Mass Index	GIANT_Randall2013PlosGenet_BMI_MEN_N	NDUFS3	2941327	5.94e-06	0.0627
200	Breast Cancer	BreastCancer_pha001336	BLOC1S2	9392921	3.29e-07	0.00829
201	Breast Cancer	BreastCancer_pha001336	SELENOW	9392936	4.18e-06	0.0242
202	Breast Cancer	BreastCancer_pha001336	MTFR1L	9392948	4.45e-06	0.0242
203	Breast Cancer	BreastCancer_pha001336	NUDC	9392955	4.7e-06	0.0242
204	Breast Cancer	BreastCancer_pha001336	SHISA4	9392960	4.8e-06	0.0242
205	Breast Cancer	BreastCancer_pha001336	TOGARAM1	9392962	9.17e-06	0.0346
206	Breast Cancer	BreastCancer_pha001336	LHX2	9392970	9.62e-06	0.0346
207	Breast Cancer	BreastCancer_pha001336	SHARPIN	9392979	1.25e-05	0.0395
208	Breast Cancer	BreastCancer_pha001336	RPS19	9392983	1.64e-05	0.0459
209	Breast Cancer	BreastCancer_pha001336	GPX4	9392995	2.58e-05	0.0592
210	Breast Cancer	BreastCancer_pha001336	DDN	9393003	2.59e-05	0.0592
211	Breast Cancer	BreastCancer_pha001336	MAPK8IP1	9393031	3.15e-05	0.0662
212	Breast Cancer	BreastCancer_pha001336	BAG6	9393047	4.73e-05	0.0918
213	Breast Cancer	BreastCancer_pha001336	DUS1L	9393052	6.4e-05	0.1
214	Breast Cancer	BreastCancer_pha001336	PPP1CA	9393057	6.91e-05	0.1
215	Breast Cancer	BreastCancer_pha001336	ROGDI	9393062	6.93e-05	0.1
216	Breast Cancer	BreastCancer_pha001336	FOXJ2	9393066	7.15e-05	0.1
217	Breast Cancer	BreastCancer_pha001336	ENTPD6	9393072	7.16e-05	0.1
218	Breast Cancer	BreastCancer_pha001336	BLOC1S2	13718160	3.29e-07	0.00829
219	Breast Cancer	BreastCancer_pha001336	SELENOW	13718211	4.18e-06	0.0242
220	Breast Cancer	BreastCancer_pha001336	MTFR1L	13718239	4.45e-06	0.0242
221	Breast Cancer	BreastCancer_pha001336	NUDC	13718261	4.7e-06	0.0242
222	Breast Cancer	BreastCancer_pha001336	SHISA4	13718289	4.8e-06	0.0242
223	Breast Cancer	BreastCancer_pha001336	TOGARAM1	13718307	9.17e-06	0.0346
224	Breast Cancer	BreastCancer_pha001336	LHX2	13718342	9.62e-06	0.0346
225	Breast Cancer	BreastCancer_pha001336	SHARPIN	13718368	1.25e-05	0.0395
226	Breast Cancer	BreastCancer_pha001336	RPS19	13718405	1.64e-05	0.0459
227	Breast Cancer	BreastCancer_pha001336	GPX4	13718443	2.58e-05	0.0592
228	Breast Cancer	BreastCancer_pha001336	DDN	13718482	2.59e-05	0.0592
229	Breast Cancer	BreastCancer_pha001336	MAPK8IP1	13718618	3.15e-05	0.0662
230	Breast Cancer	BreastCancer_pha001336	BAG6	13718659	4.73e-05	0.0918
231	Breast Cancer	BreastCancer_pha001336	DUS1L	13718708	6.4e-05	0.1
232	Breast Cancer	BreastCancer_pha001336	PPP1CA	13718738	6.91e-05	0.1
233	Breast Cancer	BreastCancer_pha001336	ROGDI	13718773	6.93e-05	0.1
234	Breast Cancer	BreastCancer_pha001336	FOXJ2	13718790	7.15e-05	0.1
235	Breast Cancer	BreastCancer_pha001336	ENTPD6	13718829	7.16e-05	0.1
236	Breast Cancer	BreastCancer_pha001338	BLOC1S2	11227198	3.55e-07	0.00896
237	Breast Cancer	BreastCancer_pha001338	NUDC	11227212	3.64e-06	0.0264
238	Breast Cancer	BreastCancer_pha001338	MTFR1L	11227222	3.72e-06	0.0264
239	Breast Cancer	BreastCancer_pha001338	SELENOW	11227241	4.93e-06	0.0264
240	Breast Cancer	BreastCancer_pha001338	SHISA4	11227252	5.24e-06	0.0264
241	Breast Cancer	BreastCancer_pha001338	SHARPIN	11227259	7.87e-06	0.0312
242	Breast Cancer	BreastCancer_pha001338	TOGARAM1	11227262	9.59e-06	0.0312
243	Breast Cancer	BreastCancer_pha001338	LHX2	11227275	1.1e-05	0.0312
244	Breast Cancer	BreastCancer_pha001338	RPS19	11227282	1.11e-05	0.0312
245	Breast Cancer	BreastCancer_pha001338	GPX4	11227298	2.15e-05	0.0543
246	Breast Cancer	BreastCancer_pha001338	MAPK8IP1	11227357	2.74e-05	0.0624
247	Breast Cancer	BreastCancer_pha001338	DDN	11227375	2.97e-05	0.0624
248	Breast Cancer	BreastCancer_pha001338	BAG6	11227383	4.13e-05	0.0802
249	Breast Cancer	BreastCancer_pha001338	DUS1L	11227392	5.52e-05	0.0841
250	Breast Cancer	BreastCancer_pha001338	ROGDI	11227403	5.68e-05	0.0841
251	Breast Cancer	BreastCancer_pha001338	FOXJ2	11227407	5.79e-05	0.0841
252	Breast Cancer	BreastCancer_pha001338	PPP1CA	11227416	5.92e-05	0.0841
253	Breast Cancer	BreastCancer_pha001338	ENTPD6	11227427	6.01e-05	0.0841
254	Breast Cancer	BreastCancer_pha001338	FAM3A	11227437	6.74e-05	0.0894
255	Breast Cancer	BreastCancer_pha001338	CMC2	11227443	7.39e-05	0.0931
256	Breast Cancer	BreastCancer_pha001338	EDF1	11227448	8.44e-05	0.0974
257	Breast Cancer	BreastCancer_pha001338	VPS4A	11227455	8.5e-05	0.0974
258	Cholesterol	Cholestreol_TC_ONE_Eur	PSRC1	1666900	5.81e-09	0.000184
259	Cholesterol	Cholestreol_TC_ONE_Eur	DOCK7	1666907	1.13e-07	0.00178
260	Cholesterol	Cholestreol_TC_ONE_Eur	GSTM4	1666916	1.16e-06	0.0123
261	Cholesterol	Cholestreol_TC_ONE_Eur	ANGPTL3	1666920	2.78e-06	0.022
262	Cholesterol	Cholestreol_TC_ONE_Eur	CTB-171A8.1	1666923	4.05e-06	0.0247
263	Cholesterol	Cholestreol_TC_ONE_Eur	RPL36P4	1666930	4.68e-06	0.0247
264	Cholesterol	Cholestreol_TC_ONE_Eur	RP11-109L13.1	1666934	7.84e-06	0.0354
265	Cholesterol	Cholestreol_TC_ONE_Eur	PSMA5	1666940	1.58e-05	0.0558
266	Cholesterol	Cholestreol_TC_ONE_Eur	APOE	1666944	1.59e-05	0.0558
267	Cholesterol	Cholestreol_TC_ONE_Eur	MLEC	1666949	1.76e-05	0.0558
268	Cholesterol	Cholestreol_TC_ONE_Eur	PLS3	1666952	2.31e-05	0.0664
269	Cholesterol	Cholestreol_TC_ONE_Eur	GDF5	1666955	3e-05	0.079
270	Cholesterol	Cholestreol_TC_ONE_Eur	SLC44A2	1666961	3.41e-05	0.0829
271	Cholesterol	Cholestreol_TC_ONE_Eur	APOB	1666964	4.36e-05	0.0957
272	Cholesterol	Cholestreol_TC_ONE_Eur	HS1BP3-IT1	1666968	4.54e-05	0.0957
273	Cholesterol	Cholestreol_TC_ONE_Eur	BCAM	1666970	5.17e-05	0.0979
274	Cholesterol	Cholestreol_TC_ONE_Eur	FER1L4	1666974	5.58e-05	0.0979
275	Cholesterol	Cholestreol_TC_ONE_Eur	POLK	1666979	5.69e-05	0.0979
276	Cholesterol	Cholestreol_TC_ONE_Eur	MACO1	1666984	6.19e-05	0.0979
277	Cholesterol	Cholestreol_TC_ONE_Eur	SIDT2	1666994	6.2e-05	0.0979
278	Cholesterol	Cholestreol_TG_ONE_Eur	SIDT2	6822185	2.41e-09	7.63e-05
279	Cholesterol	Cholestreol_TG_ONE_Eur	MLXIPL	6822193	1.42e-08	0.000225
280	Cholesterol	Cholestreol_TG_ONE_Eur	DOCK7	6822201	4.67e-08	0.000392
281	Cholesterol	Cholestreol_TG_ONE_Eur	IFT172	6822208	4.96e-08	0.000392
282	Cholesterol	Cholestreol_TG_ONE_Eur	RP11-109L13.1	6822216	9.26e-07	0.00499
283	Cholesterol	Cholestreol_TG_ONE_Eur	CGREF1	6822221	9.47e-07	0.00499
284	Cholesterol	Cholestreol_TG_ONE_Eur	AC093690.1	6822223	1.38e-06	0.00507
285	Cholesterol	Cholestreol_TG_ONE_Eur	MPV17	6822229	1.4e-06	0.00507
286	Cholesterol	Cholestreol_TG_ONE_Eur	RP11-397E7.4	6822235	1.44e-06	0.00507
287	Cholesterol	Cholestreol_TG_ONE_Eur	BABAM2	6822239	1.81e-06	0.00572
288	Cholesterol	Cholestreol_TG_ONE_Eur	ANGPTL3	6822243	2.15e-06	0.00618
289	Cholesterol	Cholestreol_TG_ONE_Eur	LOC342405	6822245	1.27e-05	0.0334
290	Cholesterol	Cholestreol_TG_ONE_Eur	KHK	6822252	1.61e-05	0.0348
291	Cholesterol	Cholestreol_TG_ONE_Eur	FNDC4	6822260	1.62e-05	0.0348
292	Cholesterol	Cholestreol_TG_ONE_Eur	ATMIN	6822269	1.65e-05	0.0348
293	Cholesterol	Cholestreol_TG_ONE_Eur	NEIL2	6822288	1.9e-05	0.0376
294	Cholesterol	Cholestreol_TG_ONE_Eur	AFF1	6822299	2.57e-05	0.0463
295	Cholesterol	Cholestreol_TG_ONE_Eur	CSGALNACT1	6822311	2.64e-05	0.0463
296	Cholesterol	Cholestreol_TG_ONE_Eur	PTPN13	6822320	5.41e-05	0.0901
297	Cholesterol	Cholestreol_TG_ONE_Eur	PAFAH1B2	6822326	6.18e-05	0.0976
298	Cholesterol	TotalCholesterol_Willer_2013	DOCK7	1641707	1.42e-07	0.00445
299	Cholesterol	TotalCholesterol_Willer_2013	WTAP	1641712	4.89e-07	0.00766
300	Cholesterol	TotalCholesterol_Willer_2013	BABAM2	1641717	1.52e-06	0.0104
301	Cholesterol	TotalCholesterol_Willer_2013	GSTM4	1641723	1.81e-06	0.0104
302	Cholesterol	TotalCholesterol_Willer_2013	MKRN2	1641732	1.91e-06	0.0104
303	Cholesterol	TotalCholesterol_Willer_2013	ATP13A1	1641738	1.99e-06	0.0104
304	Cholesterol	TotalCholesterol_Willer_2013	CTB-171A8.1	1641741	2.83e-06	0.0127
305	Cholesterol	TotalCholesterol_Willer_2013	PSRC1	1641744	3.38e-06	0.0132
306	Cholesterol	TotalCholesterol_Willer_2013	SLC44A2	1641749	5.31e-06	0.0177
307	Cholesterol	TotalCholesterol_Willer_2013	ANGPTL3	1641752	5.66e-06	0.0177
308	Cholesterol	TotalCholesterol_Willer_2013	RPL36P4	1641757	1.1e-05	0.0313
309	Cholesterol	TotalCholesterol_Willer_2013	MACO1	1641762	1.76e-05	0.0459
310	Cholesterol	TotalCholesterol_Willer_2013	RP11-109L13.1	1641770	2.15e-05	0.0519
311	Cholesterol	TotalCholesterol_Willer_2013	POLK	1641776	2.67e-05	0.0597
312	Cholesterol	TotalCholesterol_Willer_2013	PSMA5	1641786	3.21e-05	0.067
313	Cholesterol	TotalCholesterol_Willer_2013	GDF5	1641790	3.8e-05	0.0709
314	Cholesterol	TotalCholesterol_Willer_2013	FNDC4	1641798	3.84e-05	0.0709
315	Cholesterol	TotalCholesterol_Willer_2013	POC5	1641803	4.62e-05	0.0804
316	Cholesterol	TotalCholesterol_Willer_2013	MLEC	1641808	5.05e-05	0.0832
317	Cholesterol	TotalCholesterol_Willer_2013	FER1L4	1641815	6.24e-05	0.0942
318	Cholesterol	TotalCholesterol_Willer_2013	APOB	1641821	6.31e-05	0.0942
319	Cholesterol	TotalCholesterol_Willer_2013	SIDT2	1641827	6.84e-05	0.0975
320	Chronic Kidney Disease	ChronicKidneyDisease_eGFRcrea_meta	CTD-2651B20.3	7837873	2.11e-07	0.0067
321	Chronic Kidney Disease	ChronicKidneyDisease_eGFRcrea_meta	SPATA5L1	7837887	1.67e-06	0.0265
322	Chronic Kidney Disease	ChronicKidneyDisease_eGFRcyse_meta	RP11-218C14.5	47433	8.41e-12	2.67e-07
323	Cognitive Performance	SSGAC_Cognitive_Performance_Rietveld2014	RNF123	188627	1.3e-06	0.0404
324	Cognitive Performance	SSGAC_Cognitive_Performance_Rietveld2014	TUFM	188657	6.6e-06	0.0606
325	Cognitive Performance	SSGAC_Cognitive_Performance_Rietveld2014	AC009299.3	188698	8.76e-06	0.0606
326	Cognitive Performance	SSGAC_Cognitive_Performance_Rietveld2014	NPIPB6	188725	9.77e-06	0.0606
327	Cognitive Performance	SSGAC_Cognitive_Performance_Rietveld2014	RP11-1348G14.6	188742	9.77e-06	0.0606
328	Cognitive Performance	SSGAC_Cognitive_Performance_Rietveld2014	APEH	188761	1.77e-05	0.0866
329	Cognitive Performance	SSGAC_Cognitive_Performance_Rietveld2014	CDC37P1	188789	1.95e-05	0.0866
330	Cognitive Performance	SSGAC_Cognitive_Performance_Rietveld2014	MST1	188804	2.23e-05	0.0866
331	Coronary Artery Disease	Coronary_Artery_Disease_C4D_meta	PSMA5	11278973	8.42e-07	0.0258
332	Crohn Disease	Barrett_08	PTGER4	2838961	1.91e-06	0.0566
333	Crohn Disease	Barrett_08	ZNF300P1	2838986	5.54e-06	0.0566
334	Crohn Disease	Barrett_08	CYLD	2839004	5.56e-06	0.0566
335	Crohn Disease	Franke_10	PTGER4	43898	1.07e-07	0.00326
336	Crohn Disease	Franke_10	FAM212A	43899	1.06e-06	0.0108
337	Crohn Disease	Franke_10	RNF123	43900	1.06e-06	0.0108
338	Crohn Disease	Franke_10	NPIPB6	43901	5.54e-06	0.0338
339	Crohn Disease	Franke_10	RP11-1348G14.6	43902	5.54e-06	0.0338
340	Crohn Disease	Franke_10	PKLR	43904	8.47e-06	0.043
341	Crohn Disease	Franke_10	CDC37P1	43905	1.11e-05	0.0482
342	Crohn Disease	Franke_10	ASH1L	43907	1.55e-05	0.0591
343	Crohn Disease	Franke_10	SOHLH2	43911	2.09e-05	0.0675
344	Crohn Disease	Franke_10	NUPR1	43913	2.22e-05	0.0675
345	Crohn Disease	Franke_10	P4HA2	43917	2.98e-05	0.0681
346	Crohn Disease	Franke_10	SLC22A5	43923	3.05e-05	0.0681
347	Crohn Disease	Franke_10	RBM6	43925	3.31e-05	0.0681
348	Crohn Disease	Franke_10	AL133458.1	43928	3.38e-05	0.0681
349	Crohn Disease	Franke_10	GBA	43932	3.59e-05	0.0681
350	Crohn Disease	Franke_10	HCN3	43936	3.76e-05	0.0681
351	Crohn Disease	Franke_10	CYLD	43939	3.89e-05	0.0681
352	Crohn Disease	Franke_10	RP11-22P6.3	43942	4.02e-05	0.0681
353	Crohn Disease	Franke_10	PRRC1	43944	5.19e-05	0.0833
354	Crohn Disease	Franke_Cronhs_meta	PTGER4	13517833	2.97e-07	0.00904
355	Crohn Disease	Franke_Cronhs_meta	FAM212A	13517849	7.25e-07	0.011
356	Crohn Disease	Franke_Cronhs_meta	RNF123	13517853	1.68e-06	0.0156
357	Crohn Disease	Franke_Cronhs_meta	NPIPB6	13517860	2.56e-06	0.0156
358	Crohn Disease	Franke_Cronhs_meta	RP11-1348G14.6	13517867	2.56e-06	0.0156
359	Crohn Disease	Franke_Cronhs_meta	CDC37P1	13517874	5.12e-06	0.0255
360	Crohn Disease	Franke_Cronhs_meta	RP11-22P6.3	13517886	6.22e-06	0.0255
361	Crohn Disease	Franke_Cronhs_meta	FGFR1OP	13517897	6.7e-06	0.0255
362	Crohn Disease	Franke_Cronhs_meta	NUPR1	13517903	1.02e-05	0.0311
363	Crohn Disease	Franke_Cronhs_meta	AL133458.1	13517912	1.05e-05	0.0311
364	Crohn Disease	Franke_Cronhs_meta	CYLD	13517918	1.12e-05	0.0311
365	Crohn Disease	Franke_Cronhs_meta	ZPBP2	13517928	2.02e-05	0.0506
366	Crohn Disease	Franke_Cronhs_meta	UBA7	13517937	2.16e-05	0.0506
367	Crohn Disease	Franke_Cronhs_meta	PKLR	13517946	2.57e-05	0.0559
368	Crohn Disease	Franke_Cronhs_meta	IP6K1	13517952	3.27e-05	0.0642
369	Crohn Disease	Franke_Cronhs_meta	RNASET2	13517964	3.37e-05	0.0642
370	Crohn Disease	Franke_Cronhs_meta	NPIPB7	13517971	3.75e-05	0.0673
371	Crohn Disease	Franke_Cronhs_meta	RBM6	13517987	4.25e-05	0.072
372	Crohn Disease	Franke_Cronhs_meta	NFATC2IP	13517998	4.56e-05	0.0731
373	Crohn Disease	Franke_Cronhs_meta	SOHLH2	13518009	4.94e-05	0.0752
374	Crohn Disease	Franke_Cronhs_meta	P4HA2	13518018	6.19e-05	0.0874
375	Crohn Disease	Franke_Cronhs_meta	CARD6	13518029	6.31e-05	0.0874
376	Crohn Disease	Franke_Cronhs_meta	SLC22A5	13518037	7.61e-05	0.0972
377	Crohn Disease	Franke_Cronhs_meta	AC034220.3	13518046	7.65e-05	0.0972
378	Diabetes	DIAGRAMv3_2012DEC17_summary	FCHSD1	2411204	2.04e-06	0.0373
379	Diabetes	DIAGRAMv3_2012DEC17_summary	EIF2S2P3	2411208	2.37e-06	0.0373
380	Eduyears	SSGAC_EduYears_Rietveld2013	TUFM	2520578	1.32e-06	0.0167
381	Eduyears	SSGAC_EduYears_Rietveld2013	NPIPB6	2520586	1.61e-06	0.0167
382	Eduyears	SSGAC_EduYears_Rietveld2013	RP11-1348G14.6	2520594	1.61e-06	0.0167
383	Eduyears	SSGAC_EduYears_Rietveld2013	CDC37P1	2520603	3.22e-06	0.021
384	Eduyears	SSGAC_EduYears_Rietveld2013	RP11-22P6.3	2520615	3.37e-06	0.021
385	Eduyears	SSGAC_EduYears_Rietveld2013	AC009299.3	2520633	6.85e-06	0.0355
386	Eduyears	SSGAC_EduYears_Rietveld2013	IRF2BP2	2520647	9.98e-06	0.0443
387	Eduyears	SSGAC_EduYears_Rietveld2013	NPIPB7	2520659	1.23e-05	0.0477
388	Eduyears	SSGAC_EduYears_Rietveld2013	TNKS2	2520673	1.67e-05	0.0568
389	Eduyears	SSGAC_EduYears_Rietveld2013	RNF123	2520684	1.83e-05	0.0568
390	Eduyears	SSGAC_EduYears_Rietveld2013	AC009299.2	2520690	2.07e-05	0.0586
391	Extreme_bmi	GIANT_EXTREME_BMI_Berndt2013	NEGR1	12853842	3.2e-06	0.0644
392	Extreme_bmi	GIANT_EXTREME_BMI_Berndt2013	ADCY3	12853848	4.18e-06	0.0644
393	Extreme_height	GIANT_EXTREME_HEIGHT_Berndt2013	GDF5	5438289	4.21e-06	0.0838
394	Extreme_height	GIANT_EXTREME_HEIGHT_Berndt2013	VTA1	5438304	1.24e-05	0.0838
395	Extreme_height	GIANT_EXTREME_HEIGHT_Berndt2013	CDK6	5438318	1.33e-05	0.0838
396	Extreme_height	GIANT_EXTREME_HEIGHT_Berndt2013	MAP3K3	5438351	1.34e-05	0.0838
397	Extreme_height	GIANT_EXTREME_HEIGHT_Berndt2013	RN7SL417P	5438359	1.36e-05	0.0838
398	Head Circumference	EGG_Head_Circumference	ZNFX1	8170835	3.07e-07	0.00963
399	Head Circumference	EGG_Head_Circumference	OGFOD2	8170853	2.22e-06	0.0348
400	Head Circumference	EGG_Head_Circumference	SLC45A3	8170882	5.43e-06	0.0568
401	Head Circumference	EGG_Head_Circumference	PXMP4	8170903	1.34e-05	0.0738
402	Head Circumference	EGG_Head_Circumference	DCAKD	8170921	1.55e-05	0.0738
403	Head Circumference	EGG_Head_Circumference	ADORA3	8170933	1.65e-05	0.0738
404	Head Circumference	EGG_Head_Circumference	ZNF32	8170955	1.8e-05	0.0738
405	Head Circumference	EGG_Head_Circumference	SBNO1	8170982	1.88e-05	0.0738
406	Height	GIANT_HEIGHT_LangoAllen2010	FER1L4	4385431	5.79e-07	0.0182
407	Height	GIANT_HEIGHT_LangoAllen2010	RN7SL417P	4385444	2.47e-06	0.0387
408	Height	GIANT_HEIGHT_LangoAllen2010	MYH7B	4385449	4.16e-06	0.0402
409	Height	GIANT_HEIGHT_LangoAllen2010	GDF5	4385453	5.32e-06	0.0402
410	Height	GIANT_HEIGHT_LangoAllen2010	IGHG1	4385459	6.41e-06	0.0402
411	Height	GIANT_HEIGHT_LangoAllen2010	GPR152	4385462	1.03e-05	0.0489
412	Height	GIANT_HEIGHT_LangoAllen2010	E2F1	4385467	1.18e-05	0.0489
413	Height	GIANT_HEIGHT_LangoAllen2010	ADAMTSL3	4385475	1.25e-05	0.0489
414	Height	GIANT_HEIGHT_LangoAllen2010	SALL4P7	4385480	1.78e-05	0.0585
415	Height	GIANT_HEIGHT_LangoAllen2010	EIF6	4385493	1.87e-05	0.0585
416	Height	GIANT_HEIGHT_LangoAllen2010	ERGIC3	4385502	2.81e-05	0.0784
417	Height	GIANT_HEIGHT_LangoAllen2010	U91328.19	4385511	3.11e-05	0.0784
418	Height	GIANT_HEIGHT_LangoAllen2010	ADCY3	4385523	3.35e-05	0.0784
419	Height	GIANT_HEIGHT_LangoAllen2010	RP4-614O4.12	4385531	3.5e-05	0.0784
420	Height	GIANT_HEIGHT_LangoAllen2010	RPL36P4	4385539	4.65e-05	0.0972
421	Height	GIANT_HEIGHT_Wood_et_al_2014	AC034220.3	7117759	3.4e-07	0.0107
422	Height	GIANT_HEIGHT_Wood_et_al_2014	C6orf106	7117776	1.11e-06	0.0133
423	Height	GIANT_HEIGHT_Wood_et_al_2014	ERGIC3	7117797	1.27e-06	0.0133
424	Height	GIANT_HEIGHT_Wood_et_al_2014	FER1L4	7117829	4.23e-06	0.0333
425	Height	GIANT_HEIGHT_Wood_et_al_2014	HIST1H4B	7117839	1.37e-05	0.086
426	Height	GIANT_HEIGHT_Wood_et_al_2014	PPARD	7117857	1.73e-05	0.0907
427	Height	GIANT_HEIGHT_Wood_et_al_2014	PRRT3	7117873	2.34e-05	0.0928
428	Height	GIANT_HEIGHT_Wood_et_al_2014	CPNE1	7117903	2.62e-05	0.0928
429	Height	GIANT_HEIGHT_Wood_et_al_2014	MAP1LC3A	7117928	2.66e-05	0.0928
430	Height	GIANT_Randall2013PlosGenet_HEIGHT_MEN_N	GDF5	4628206	4.39e-07	0.0139
431	Height	GIANT_Randall2013PlosGenet_HEIGHT_MEN_N	MYH7B	4628235	2.68e-06	0.0425
432	Height	GIANT_Randall2013PlosGenet_HEIGHT_WOMEN_N	RN7SL417P	2977333	7.77e-07	0.0181
433	Height	GIANT_Randall2013PlosGenet_HEIGHT_WOMEN_N	ADCY3	2977362	1.66e-06	0.0181
434	Height	GIANT_Randall2013PlosGenet_HEIGHT_WOMEN_N	SALL4P7	2977379	2.7e-06	0.0181
435	Height	GIANT_Randall2013PlosGenet_HEIGHT_WOMEN_N	GDF5	2977394	2.73e-06	0.0181
436	Height	GIANT_Randall2013PlosGenet_HEIGHT_WOMEN_N	ADAMTSL3	2977418	2.85e-06	0.0181
437	Height	GIANT_Randall2013PlosGenet_HEIGHT_WOMEN_N	RP11-509E16.1	2977434	1.04e-05	0.0462
438	Height	GIANT_Randall2013PlosGenet_HEIGHT_WOMEN_N	GPR152	2977446	1.14e-05	0.0462
439	Height	GIANT_Randall2013PlosGenet_HEIGHT_WOMEN_N	RP4-614O4.12	2977481	1.17e-05	0.0462
440	Height	GIANT_Randall2013PlosGenet_HEIGHT_WOMEN_N	VTA1	2977499	1.4e-05	0.0492
441	Height	GIANT_Randall2013PlosGenet_HEIGHT_WOMEN_N	MYH7B	2977530	1.63e-05	0.0518
442	Height	GIANT_Randall2013PlosGenet_HEIGHT_WOMEN_N	CDK6	2977552	2.32e-05	0.0669
443	Height	GIANT_Randall2013PlosGenet_HEIGHT_WOMEN_N	E2F1	2977571	3.6e-05	0.095
444	Height	GIANT_Yang2012Nature_HapMapCeuFreq_Height	LGALS8	7859815	1.14e-06	0.0357
445	High-density Lipoprotein Cholesterol	Cholestreol_HDL_ONE_Eur	ACP2	11283721	1.62e-07	0.00512
446	High-density Lipoprotein Cholesterol	Cholestreol_HDL_ONE_Eur	DPEP3	11283739	1.66e-06	0.0263
447	High-density Lipoprotein Cholesterol	Cholestreol_HDL_ONE_Eur	LCAT	11283757	2.91e-06	0.0307
448	High-density Lipoprotein Cholesterol	Cholestreol_HDL_ONE_Eur	FAM180B	11283766	4.67e-06	0.0369
449	High-density Lipoprotein Cholesterol	Cholestreol_HDL_ONE_Eur	PSKH1	11283778	6.14e-06	0.0388
450	High-density Lipoprotein Cholesterol	Cholestreol_HDL_ONE_Eur	NDUFS3	11283797	7.64e-06	0.0403
451	High-density Lipoprotein Cholesterol	Cholestreol_HDL_ONE_Eur	ACD	11283802	1.21e-05	0.0463
452	High-density Lipoprotein Cholesterol	Cholestreol_HDL_ONE_Eur	ERBB2	11283813	1.28e-05	0.0463
453	High-density Lipoprotein Cholesterol	Cholestreol_HDL_ONE_Eur	RP11-109L13.1	11283840	1.32e-05	0.0463
454	High-density Lipoprotein Cholesterol	Cholestreol_HDL_ONE_Eur	CETP	11283850	1.71e-05	0.0539
455	High-density Lipoprotein Cholesterol	Cholestreol_HDL_ONE_Eur	CCDC92	11283865	2.01e-05	0.0567
456	High-density Lipoprotein Cholesterol	Cholestreol_HDL_ONE_Eur	TCEANC2	11283880	2.15e-05	0.0567
457	High-density Lipoprotein Cholesterol	Cholestreol_HDL_ONE_Eur	CKAP5	11283888	2.5e-05	0.0608
458	High-density Lipoprotein Cholesterol	Cholestreol_HDL_ONE_Eur	PARD6A	11283900	2.9e-05	0.0628
459	High-density Lipoprotein Cholesterol	Cholestreol_HDL_ONE_Eur	DUS2	11283921	3.08e-05	0.0628
460	High-density Lipoprotein Cholesterol	Cholestreol_HDL_ONE_Eur	DMRTC1	11283925	3.21e-05	0.0628
461	High-density Lipoprotein Cholesterol	Cholestreol_HDL_ONE_Eur	AGBL2	11283938	3.48e-05	0.0628
462	High-density Lipoprotein Cholesterol	Cholestreol_HDL_ONE_Eur	NR1H3	11283950	3.73e-05	0.0628
463	High-density Lipoprotein Cholesterol	Cholestreol_HDL_ONE_Eur	CACNB1	11283964	3.77e-05	0.0628
464	High-density Lipoprotein Cholesterol	Cholestreol_HDL_ONE_Eur	IRF7	11283979	4.4e-05	0.0696
465	High-density Lipoprotein Cholesterol	HDL_Willer_2013	C1QTNF4	2458185	4.69e-07	0.0029
466	High-density Lipoprotein Cholesterol	HDL_Willer_2013	ACP2	2459092	5.56e-07	0.0029
467	High-density Lipoprotein Cholesterol	HDL_Willer_2013	ACD	2459097	1.96e-05	0.0361
468	High-density Lipoprotein Cholesterol	HDL_Willer_2013	CACNB1	2461915	2.39e-05	0.0404
469	High-density Lipoprotein Cholesterol	HDL_Willer_2013	AGBL2	2461924	2.9e-05	0.0454
470	High-density Lipoprotein Cholesterol	HDL_Willer_2013	C6orf106	2461938	9.75e-05	0.0923
471	High-density Lipoprotein Cholesterol	HDL_Willer_2013	C11orf49	2469446	1.11e-05	0.0289
472	High-density Lipoprotein Cholesterol	HDL_Willer_2013	CKAP5	2478151	4.98e-07	0.0029
473	High-density Lipoprotein Cholesterol	HDL_Willer_2013	CCDC92	2478157	3.61e-05	0.0513
474	High-density Lipoprotein Cholesterol	HDL_Willer_2013	CETP	2482211	4.02e-05	0.0524
475	High-density Lipoprotein Cholesterol	HDL_Willer_2013	DPEP3	2490700	4.84e-06	0.0166
476	High-density Lipoprotein Cholesterol	HDL_Willer_2013	DUS2	2490710	5e-05	0.0625
477	High-density Lipoprotein Cholesterol	HDL_Willer_2013	FAM180B	2498807	1.93e-05	0.0361
478	High-density Lipoprotein Cholesterol	HDL_Willer_2013	ESRP2	2499995	5.21e-07	0.0029
479	High-density Lipoprotein Cholesterol	HDL_Willer_2013	GFOD2	2505071	5.84e-06	0.0166
480	High-density Lipoprotein Cholesterol	HDL_Willer_2013	IRF7	2511800	8.55e-05	0.0862
481	High-density Lipoprotein Cholesterol	HDL_Willer_2013	LCAT	2517489	4.25e-06	0.0166
482	High-density Lipoprotein Cholesterol	HDL_Willer_2013	LRP4	2518640	3.13e-05	0.0466
483	High-density Lipoprotein Cholesterol	HDL_Willer_2013	MYBPC3	2523460	4.39e-07	0.0029
484	High-density Lipoprotein Cholesterol	HDL_Willer_2013	NDUFS3	2523919	1.56e-06	0.00696
485	High-density Lipoprotein Cholesterol	HDL_Willer_2013	PARD6A	2523924	1.96e-05	0.0361
486	High-density Lipoprotein Cholesterol	HDL_Willer_2013	NR1H3	2527656	9.31e-08	0.0029
487	High-density Lipoprotein Cholesterol	HDL_Willer_2013	PTPMT1	2543847	5.85e-06	0.0166
488	High-density Lipoprotein Cholesterol	HDL_Willer_2013	PSKH1	2544767	1.29e-05	0.0311
489	High-density Lipoprotein Cholesterol	HDL_Willer_2013	PSMA5	2544776	8.06e-05	0.084
490	High-density Lipoprotein Cholesterol	HDL_Willer_2013	RAPSN	2547439	3.78e-05	0.0513
491	High-density Lipoprotein Cholesterol	HDL_Willer_2013	RP11-407G23.4	2551089	8.92e-05	0.0872
492	High-density Lipoprotein Cholesterol	HDL_Willer_2013	RNF214	2551095	0.000105	0.0968
493	High-density Lipoprotein Cholesterol	HDL_Willer_2013	SLC39A13	2562479	5.78e-05	0.0695
494	High-density Lipoprotein Cholesterol	HDL_Willer_2013	TCEANC2	2582818	7.83e-05	0.084
495	High-density Lipoprotein Cholesterol	HDL_Willer_2013	TSNAXIP1	2583440	8.04e-05	0.084
496	High-density Lipoprotein Cholesterol	HDL_Willer_2013	WDR17	2593675	6.87e-05	0.0795
497	High-density Lipoprotein Cholesterol	HDL_Willer_2013	ZNF408	2596164	1.78e-05	0.0361
498	High-density Lipoprotein Cholesterol	HDL_Willer_2013	RP11-109L13.1	2596184	2.45e-05	0.0404
499	Hip	GIANT_2015_HIP_COMBINED_AllAncestries	FUBP1	6097050	1.06e-08	0.000334
500	Hip	GIANT_2015_HIP_COMBINED_AllAncestries	NPIPB7	6097051	1.65e-07	0.00199
501	Hip	GIANT_2015_HIP_COMBINED_AllAncestries	RP11-1348G14.6	6097052	2.34e-07	0.00199
502	Hip	GIANT_2015_HIP_COMBINED_AllAncestries	NPIPB6	6097053	2.54e-07	0.00199
503	Hip	GIANT_2015_HIP_COMBINED_AllAncestries	CDC37P1	6097054	9.86e-07	0.00619
504	Hip	GIANT_2015_HIP_COMBINED_AllAncestries	EIF3CL	6097055	1.44e-06	0.00678
505	Hip	GIANT_2015_HIP_COMBINED_AllAncestries	RP11-22P6.3	6097056	1.51e-06	0.00678
506	Hip	GIANT_2015_HIP_COMBINED_AllAncestries	NUPR1	6097057	1.89e-06	0.00743
507	Hip	GIANT_2015_HIP_COMBINED_AllAncestries	NEGR1	6097058	3.31e-06	0.0116
508	Hip	GIANT_2015_HIP_COMBINED_AllAncestries	TUFM	6097060	3.7e-06	0.0116
509	Hip	GIANT_2015_HIP_COMBINED_AllAncestries	TFAP2B	6097061	4.46e-06	0.0127
510	Hip	GIANT_2015_HIP_COMBINED_AllAncestries	NFATC2IP	6097063	5.62e-06	0.0147
511	Hip	GIANT_2015_HIP_COMBINED_AllAncestries	RBL2	6097064	8.24e-06	0.0199
512	Hip	GIANT_2015_HIP_COMBINED_AllAncestries	LGR4	6097066	1.53e-05	0.0344
513	Hip	GIANT_2015_HIP_COMBINED_AllAncestries	GDF5	6097068	1.77e-05	0.0371
514	Hip	GIANT_2015_HIP_COMBINED_AllAncestries	RABEP2	6097070	4.3e-05	0.0844
515	Hip	GIANT_2015_HIP_COMBINED_AllAncestries	HIST1H2BF	6097071	4.72e-05	0.0848
516	Hip	GIANT_2015_HIP_COMBINED_AllAncestries	C6orf106	6097074	4.86e-05	0.0848
517	Hip	GIANT_2015_HIP_COMBINED_EUR	FUBP1	3388056	1.11e-08	0.00035
518	Hip	GIANT_2015_HIP_COMBINED_EUR	NPIPB7	3388060	1.68e-07	0.00242
519	Hip	GIANT_2015_HIP_COMBINED_EUR	RP11-1348G14.6	3388064	2.98e-07	0.00242
520	Hip	GIANT_2015_HIP_COMBINED_EUR	NPIPB6	3388071	3.07e-07	0.00242
521	Hip	GIANT_2015_HIP_COMBINED_EUR	CDC37P1	3388078	6.74e-07	0.00423
522	Hip	GIANT_2015_HIP_COMBINED_EUR	EIF3CL	3388083	1.43e-06	0.00697
523	Hip	GIANT_2015_HIP_COMBINED_EUR	RP11-22P6.3	3388088	1.55e-06	0.00697
524	Hip	GIANT_2015_HIP_COMBINED_EUR	NUPR1	3388094	2.5e-06	0.00982
525	Hip	GIANT_2015_HIP_COMBINED_EUR	TUFM	3388106	3.17e-06	0.0111
526	Hip	GIANT_2015_HIP_COMBINED_EUR	NEGR1	3388111	4.42e-06	0.0139
527	Hip	GIANT_2015_HIP_COMBINED_EUR	NFATC2IP	3388117	5.72e-06	0.0164
528	Hip	GIANT_2015_HIP_COMBINED_EUR	TFAP2B	3388120	7.1e-06	0.0186
529	Hip	GIANT_2015_HIP_COMBINED_EUR	RBL2	3388127	8.65e-06	0.0209
530	Hip	GIANT_2015_HIP_COMBINED_EUR	LGR4	3388138	1.6e-05	0.0358
531	Hip	GIANT_2015_HIP_COMBINED_EUR	GDF5	3388141	1.84e-05	0.0385
532	Hip	GIANT_2015_HIP_COMBINED_EUR	FER1L4	3388150	4.16e-05	0.0816
533	Hip	GIANT_2015_HIP_COMBINED_EUR	RABEP2	3388156	4.48e-05	0.0829
534	Hip	GIANT_2015_HIP_COMBINED_EUR	HIST1H2BF	3388161	4.8e-05	0.0839
535	Hip	GIANT_2015_HIP_COMBINED_EUR	C6orf106	3388170	5.46e-05	0.0903
536	Hip	GIANT_2015_HIP_FEMALES_AllAncestries	FUBP1	883425	3.12e-08	0.000978
537	Hip	GIANT_2015_HIP_FEMALES_AllAncestries	NPIPB6	883444	9.03e-07	0.00711
538	Hip	GIANT_2015_HIP_FEMALES_AllAncestries	RP11-1348G14.6	883461	9.03e-07	0.00711
539	Hip	GIANT_2015_HIP_FEMALES_AllAncestries	NPIPB7	883480	9.06e-07	0.00711
540	Hip	GIANT_2015_HIP_FEMALES_AllAncestries	EIF3CL	883501	1.52e-06	0.00944
541	Hip	GIANT_2015_HIP_FEMALES_AllAncestries	CDC37P1	883532	1.81e-06	0.00944
542	Hip	GIANT_2015_HIP_FEMALES_AllAncestries	RP11-22P6.3	883556	2.48e-06	0.0111
543	Hip	GIANT_2015_HIP_FEMALES_AllAncestries	NFATC2IP	883585	4.75e-06	0.0186
544	Hip	GIANT_2015_HIP_FEMALES_AllAncestries	NEGR1	883599	5.56e-06	0.0194
545	Hip	GIANT_2015_HIP_FEMALES_AllAncestries	RYBP	883619	6.84e-06	0.0214
546	Hip	GIANT_2015_HIP_FEMALES_AllAncestries	NUPR1	883649	1.05e-05	0.03
547	Hip	GIANT_2015_HIP_FEMALES_AllAncestries	RABEP2	883671	1.45e-05	0.038
548	Hip	GIANT_2015_HIP_FEMALES_EUR	FUBP1	13518242	2.81e-08	0.000882
549	Hip	GIANT_2015_HIP_FEMALES_EUR	NPIPB7	13518253	9.93e-07	0.0085
550	Hip	GIANT_2015_HIP_FEMALES_EUR	NPIPB6	13518263	1.08e-06	0.0085
551	Hip	GIANT_2015_HIP_FEMALES_EUR	RP11-1348G14.6	13518271	1.08e-06	0.0085
552	Hip	GIANT_2015_HIP_FEMALES_EUR	EIF3CL	13518278	1.52e-06	0.00951
553	Hip	GIANT_2015_HIP_FEMALES_EUR	CDC37P1	13518289	2.17e-06	0.0105
554	Hip	GIANT_2015_HIP_FEMALES_EUR	RP11-22P6.3	13518297	2.35e-06	0.0105
555	Hip	GIANT_2015_HIP_FEMALES_EUR	NEGR1	13518306	3.86e-06	0.0151
556	Hip	GIANT_2015_HIP_FEMALES_EUR	NFATC2IP	13518321	4.48e-06	0.0156
557	Hip	GIANT_2015_HIP_FEMALES_EUR	RYBP	13518331	1.04e-05	0.0327
558	Hip	GIANT_2015_HIP_FEMALES_EUR	RABEP2	13518340	1.42e-05	0.039
559	Hip	GIANT_2015_HIP_FEMALES_EUR	NUPR1	13518359	1.49e-05	0.039
560	Hip	GIANT_2015_HIP_FEMALES_EUR	IL27	13518374	2.43e-05	0.0586
561	Hip	GIANT_2015_HIP_MALES_AllAncestries	NPIPB6	3964002	5.47e-07	0.00846
562	Hip	GIANT_2015_HIP_MALES_AllAncestries	RP11-1348G14.6	3964052	5.47e-07	0.00846
563	Hip	GIANT_2015_HIP_MALES_AllAncestries	NUPR1	3964071	8.41e-07	0.00867
564	Hip	GIANT_2015_HIP_MALES_AllAncestries	FER1L4	3964097	1.82e-06	0.0141
565	Hip	GIANT_2015_HIP_MALES_EUR	NUPR1	853580	5.93e-08	0.000648
566	Hip	GIANT_2015_HIP_MALES_EUR	NPIPB6	853593	6.28e-08	0.000648
567	Hip	GIANT_2015_HIP_MALES_EUR	RP11-1348G14.6	853608	6.28e-08	0.000648
568	Hip	GIANT_2015_HIP_MALES_EUR	FER1L4	853620	6.69e-07	0.00517
569	Hip	GIANT_2015_HIP_MALES_EUR	GDF5	853631	1.56e-05	0.0967
570	Hip Adjusted Bmi	GIANT_2015_HIPadjBMI_COMBINED_EUR	U91328.19	9682701	6.4e-07	0.0135
571	Hip Adjusted Bmi	GIANT_2015_HIPadjBMI_COMBINED_EUR	FER1L4	9682732	8.62e-07	0.0135
572	Hip Adjusted Bmi	GIANT_2015_HIPadjBMI_COMBINED_EUR	GDF5	9682747	4.15e-06	0.0339
573	Hip Adjusted Bmi	GIANT_2015_HIPadjBMI_COMBINED_EUR	GPR152	9682750	4.31e-06	0.0339
574	Hip Adjusted Bmi	GIANT_2015_HIPadjBMI_COMBINED_EUR	HIST1H3B	9682764	5.73e-06	0.036
575	Hip Adjusted Bmi	GIANT_2015_HIPadjBMI_COMBINED_EUR	HIST1H4B	9682776	7.24e-06	0.0379
576	Hip Adjusted Bmi	GIANT_2015_HIPadjBMI_COMBINED_EUR	HIST1H2BD	9682802	9.43e-06	0.0382
577	Hip Adjusted Bmi	GIANT_2015_HIPadjBMI_COMBINED_EUR	RN7SL417P	9682812	9.71e-06	0.0382
578	Hip Adjusted Bmi	GIANT_2015_HIPadjBMI_COMBINED_EUR	ADAMTSL3	9682837	2e-05	0.0651
579	Hip Adjusted Bmi	GIANT_2015_HIPadjBMI_COMBINED_EUR	BTN2A2	9682870	2.07e-05	0.0651
580	Hip Adjusted Bmi	GIANT_2015_HIPadjBMI_COMBINED_EUR	HIST1H1C	9682888	2.51e-05	0.0718
581	Hip Adjusted Bmi	GIANT_2015_HIPadjBMI_COMBINED_EUR	FAM208A	9682918	3.33e-05	0.0873
582	Hip Adjusted Bmi	GIANT_2015_HIPadjBMI_FEMALES_AllAncestries	FER1L4	5779925	4e-06	0.0776
583	Hip Adjusted Bmi	GIANT_2015_HIPadjBMI_FEMALES_AllAncestries	GDF5	5779952	5.13e-06	0.0776
584	Hip Adjusted Bmi	GIANT_2015_HIPadjBMI_FEMALES_AllAncestries	RN7SL417P	5779973	1.06e-05	0.0776
585	Hip Adjusted Bmi	GIANT_2015_HIPadjBMI_FEMALES_AllAncestries	VPS53	5779998	1.4e-05	0.0776
586	Hip Adjusted Bmi	GIANT_2015_HIPadjBMI_FEMALES_AllAncestries	CDK6	5780019	1.53e-05	0.0776
587	Hip Adjusted Bmi	GIANT_2015_HIPadjBMI_FEMALES_AllAncestries	U91328.19	5780038	1.68e-05	0.0776
588	Hip Adjusted Bmi	GIANT_2015_HIPadjBMI_FEMALES_AllAncestries	GPR152	5780049	1.73e-05	0.0776
589	Hip Adjusted Bmi	GIANT_2015_HIPadjBMI_FEMALES_AllAncestries	HMGA2	5780059	2.17e-05	0.0809
590	Hip Adjusted Bmi	GIANT_2015_HIPadjBMI_FEMALES_AllAncestries	ABCB9	5780084	2.6e-05	0.0809
591	Hip Adjusted Bmi	GIANT_2015_HIPadjBMI_FEMALES_AllAncestries	ADAMTSL3	5780100	2.68e-05	0.0809
592	Hip Adjusted Bmi	GIANT_2015_HIPadjBMI_FEMALES_AllAncestries	SALL4P7	5780121	3.05e-05	0.0809
593	Hip Adjusted Bmi	GIANT_2015_HIPadjBMI_FEMALES_AllAncestries	VTA1	5780132	3.1e-05	0.0809
594	Hip Adjusted Bmi	GIANT_2015_HIPadjBMI_FEMALES_EUR	FER1L4	4521328	4.2e-06	0.0685
595	Hip Adjusted Bmi	GIANT_2015_HIPadjBMI_FEMALES_EUR	GDF5	4521346	5.51e-06	0.0685
596	Hip Adjusted Bmi	GIANT_2015_HIPadjBMI_FEMALES_EUR	RN7SL417P	4521363	1.15e-05	0.0685
597	Hip Adjusted Bmi	GIANT_2015_HIPadjBMI_FEMALES_EUR	U91328.19	4521379	1.4e-05	0.0685
598	Hip Adjusted Bmi	GIANT_2015_HIPadjBMI_FEMALES_EUR	VPS53	4521401	1.52e-05	0.0685
599	Hip Adjusted Bmi	GIANT_2015_HIPadjBMI_FEMALES_EUR	GPR152	4521409	1.57e-05	0.0685
600	Hip Adjusted Bmi	GIANT_2015_HIPadjBMI_FEMALES_EUR	CDK6	4521420	1.65e-05	0.0685
601	Hip Adjusted Bmi	GIANT_2015_HIPadjBMI_FEMALES_EUR	ABCB9	4521441	1.75e-05	0.0685
602	Hip Adjusted Bmi	GIANT_2015_HIPadjBMI_FEMALES_EUR	HMGA2	4521449	2.36e-05	0.0798
603	Hip Adjusted Bmi	GIANT_2015_HIPadjBMI_FEMALES_EUR	HIST1H3B	4521460	2.7e-05	0.0798
604	Hip Adjusted Bmi	GIANT_2015_HIPadjBMI_FEMALES_EUR	ADAMTSL3	4521476	2.87e-05	0.0798
605	Hip Adjusted Bmi	GIANT_2015_HIPadjBMI_FEMALES_EUR	SALL4P7	4521491	3.27e-05	0.0798
606	Hip Adjusted Bmi	GIANT_2015_HIPadjBMI_FEMALES_EUR	VTA1	4521507	3.31e-05	0.0798
607	Hip Adjusted Bmi	GIANT_2015_HIPadjBMI_FEMALES_EUR	HIST1H1C	4521527	4.33e-05	0.097
608	Hip Adjusted Bmi	GIANT_2015_HIPadjBMI_FEMALES_EUR	HHIP-AS1	4521535	4.75e-05	0.0994
609	Hip Adjusted Bmi	GIANT_2015_HIPadjBMI_MALES_AllAncestries	FER1L4	7906673	1.21e-06	0.0374
610	Hip Adjusted Bmi	GIANT_2015_HIPadjBMI_MALES_AllAncestries	GDF5	7906692	2.78e-06	0.043
611	Hip Adjusted Bmi	GIANT_2015_HIPadjBMI_MALES_AllAncestries	RN7SL417P	7906708	6.13e-06	0.0543
612	Hip Adjusted Bmi	GIANT_2015_HIPadjBMI_MALES_AllAncestries	HIST1H2AC	7906716	7.03e-06	0.0543
613	Hip Adjusted Bmi	GIANT_2015_HIPadjBMI_MALES_AllAncestries	ADAMTSL3	7906737	1.24e-05	0.0767
614	Hip Adjusted Bmi	GIANT_2015_HIPadjBMI_MALES_EUR	FER1L4	10335521	9.5e-07	0.0225
615	Hip Adjusted Bmi	GIANT_2015_HIPadjBMI_MALES_EUR	RP11-182J1.13	10335522	1.46e-06	0.0225
616	Hip Adjusted Bmi	GIANT_2015_HIPadjBMI_MALES_EUR	GDF5	10335526	2.77e-06	0.0286
617	Hip Adjusted Bmi	GIANT_2015_HIPadjBMI_MALES_EUR	HIST1H2AC	10335528	5.37e-06	0.0389
618	Hip Adjusted Bmi	GIANT_2015_HIPadjBMI_MALES_EUR	RN7SL417P	10335532	6.29e-06	0.0389
619	Hip Adjusted Bmi	GIANT_2015_HIPadjBMI_MALES_EUR	ADAMTSL3	10335536	1.22e-05	0.0579
620	Hip Adjusted Bmi	GIANT_2015_HIPadjBMI_MALES_EUR	HIST1H2BD	10335545	1.39e-05	0.0579
621	Hip Adjusted Bmi	GIANT_2015_HIPadjBMI_MALES_EUR	HIST1H3B	10335550	1.5e-05	0.0579
622	Hip Adjusted Bmi	GIANT_2015_HIPadjBMI_MALES_EUR	HHIP	10335554	2.58e-05	0.0841
623	Hip Adjusted Bmi	GIANT_2015_HIPadjBMI_MALES_EUR	EPB41L1	10335561	2.72e-05	0.0841
624	Hip Adjusted Bmi	GIANT_2015_HIPadjBMI_MALES_EUR	CROCC	10335570	3.53e-05	0.0993
625	Hip Adjusted Bmi	GIANT_HIPadjBMI_COMBINED_ALLAnce	FER1L4	1797833	7.95e-07	0.0222
626	Hip Adjusted Bmi	GIANT_HIPadjBMI_COMBINED_ALLAnce	U91328.19	1797855	1.41e-06	0.0222
627	Hip Adjusted Bmi	GIANT_HIPadjBMI_COMBINED_ALLAnce	GPR152	1797862	3.5e-06	0.0315
628	Hip Adjusted Bmi	GIANT_HIPadjBMI_COMBINED_ALLAnce	GDF5	1797873	4.01e-06	0.0315
629	Hip Adjusted Bmi	GIANT_HIPadjBMI_COMBINED_ALLAnce	HIST1H4B	1797888	8.25e-06	0.042
630	Hip Adjusted Bmi	GIANT_HIPadjBMI_COMBINED_ALLAnce	RN7SL417P	1797905	9.19e-06	0.042
631	Hip Adjusted Bmi	GIANT_HIPadjBMI_COMBINED_ALLAnce	HIST1H3B	1797918	9.36e-06	0.042
632	Hip Adjusted Bmi	GIANT_HIPadjBMI_COMBINED_ALLAnce	ADAMTSL3	1797939	1.95e-05	0.0688
633	Hip Adjusted Bmi	GIANT_HIPadjBMI_COMBINED_ALLAnce	FAM208A	1797963	2.09e-05	0.0688
634	Hip Adjusted Bmi	GIANT_HIPadjBMI_COMBINED_ALLAnce	BTN2A2	1797989	2.19e-05	0.0688
635	Hip Adjusted Bmi	GIANT_HIPadjBMI_COMBINED_ALLAnce	HIST1H1C	1798008	2.71e-05	0.0775
636	Hip Adjusted Bmi	GIANT_HIPadjBMI_COMBINED_ALLAnce	IGHG1	1798020	3.33e-05	0.0873
637	Inflammatory Bowel Disease	IBD.EU_Liu_2015	AMT	7169088	1.98e-06	0.0487
638	Inflammatory Bowel Disease	IBD.EU_Liu_2015	CAMKV	7169107	2.97e-06	0.0487
639	Inflammatory Bowel Disease	IBD.EU_Liu_2015	ZPBP2	7169127	8e-06	0.0875
640	Inflammatory Bowel Disease	IBD.EU_Liu_2015	CUL2	7169156	1.14e-05	0.0939
641	Low-density Lipoprotein Cholesterol	Cholestreol_LDL_ONE_Eur	PSRC1	2600873	3.18e-09	0.0001
642	Low-density Lipoprotein Cholesterol	Cholestreol_LDL_ONE_Eur	GSTM4	2600885	1.83e-07	0.0029
643	Low-density Lipoprotein Cholesterol	Cholestreol_LDL_ONE_Eur	DOCK7	2600896	9.01e-07	0.00949
644	Low-density Lipoprotein Cholesterol	Cholestreol_LDL_ONE_Eur	ANGPTL3	2600902	1.92e-06	0.0141
645	Low-density Lipoprotein Cholesterol	Cholestreol_LDL_ONE_Eur	CTB-171A8.1	2600909	2.25e-06	0.0141
646	Low-density Lipoprotein Cholesterol	Cholestreol_LDL_ONE_Eur	PSMA5	2600921	2.67e-06	0.0141
647	Low-density Lipoprotein Cholesterol	Cholestreol_LDL_ONE_Eur	SLC44A2	2600934	6.94e-06	0.0313
648	Low-density Lipoprotein Cholesterol	Cholestreol_LDL_ONE_Eur	MLEC	2600942	9.35e-06	0.0369
649	Low-density Lipoprotein Cholesterol	Cholestreol_LDL_ONE_Eur	RP11-290H9.4	2600949	1.09e-05	0.0384
650	Low-density Lipoprotein Cholesterol	Cholestreol_LDL_ONE_Eur	APOE	2600957	1.59e-05	0.0503
651	Low-density Lipoprotein Cholesterol	Cholestreol_LDL_ONE_Eur	MACO1	2600963	2.64e-05	0.0746
652	Low-density Lipoprotein Cholesterol	Cholestreol_LDL_ONE_Eur	AC012065.7	2600970	2.83e-05	0.0746
653	Low-density Lipoprotein Cholesterol	Cholestreol_LDL_ONE_Eur	BCAM	2600976	3.09e-05	0.0751
654	Low-density Lipoprotein Cholesterol	Cholestreol_LDL_ONE_Eur	POLK	2600988	3.63e-05	0.0819
655	Low-density Lipoprotein Cholesterol	Cholestreol_LDL_ONE_Eur	ZNF441	2600996	4.54e-05	0.0956
656	Low-density Lipoprotein Cholesterol	LDL_Willer_2013	GSTM4	12853852	9.53e-08	0.00133
657	Low-density Lipoprotein Cholesterol	LDL_Willer_2013	SLC44A2	12853862	1.04e-07	0.00133
658	Low-density Lipoprotein Cholesterol	LDL_Willer_2013	PSRC1	12853872	1.27e-07	0.00133
659	Low-density Lipoprotein Cholesterol	LDL_Willer_2013	WTAP	12853881	5.56e-07	0.00435
660	Low-density Lipoprotein Cholesterol	LDL_Willer_2013	DOCK7	12853897	8.85e-07	0.00554
661	Low-density Lipoprotein Cholesterol	LDL_Willer_2013	CTB-171A8.1	12853906	1.95e-06	0.0102
662	Low-density Lipoprotein Cholesterol	LDL_Willer_2013	ANGPTL3	12853919	3.9e-06	0.0174
663	Low-density Lipoprotein Cholesterol	LDL_Willer_2013	MACO1	12853928	5.95e-06	0.0208
664	Low-density Lipoprotein Cholesterol	LDL_Willer_2013	PSMA5	12853943	5.97e-06	0.0208
665	Low-density Lipoprotein Cholesterol	LDL_Willer_2013	APOE	12853955	1.19e-05	0.0374
666	Low-density Lipoprotein Cholesterol	LDL_Willer_2013	POLK	12853964	1.63e-05	0.0464
667	Low-density Lipoprotein Cholesterol	LDL_Willer_2013	MLEC	12853975	2.03e-05	0.0495
668	Low-density Lipoprotein Cholesterol	LDL_Willer_2013	TMEM50A	12853991	2.05e-05	0.0495
669	Low-density Lipoprotein Cholesterol	LDL_Willer_2013	GSTM2	12854004	2.4e-05	0.0499
670	Low-density Lipoprotein Cholesterol	LDL_Willer_2013	ATP13A1	12854019	2.48e-05	0.0499
671	Low-density Lipoprotein Cholesterol	LDL_Willer_2013	POC5	12854031	2.55e-05	0.0499
672	Low-density Lipoprotein Cholesterol	LDL_Willer_2013	MKRN2	12854040	5.21e-05	0.096
673	Low-density Lipoprotein Cholesterol	LDL_Willer_2013	AC012065.7	12854049	5.6e-05	0.0974
674	Low-density Lipoprotein Cholesterol	LDL_Willer_2013	SORT1	12854059	6.08e-05	0.0986
675	Low-density Lipoprotein Cholesterol	LDL_Willer_2013	BCAM	12854065	6.3e-05	0.0986
676	Lung Cancer	LungCancer_pha003853	SOCS1	9736242	3.88e-06	0.054
677	Lung Cancer	LungCancer_pha003853	MICAL1	9736259	6.53e-06	0.054
678	Lung Cancer	LungCancer_pha003854	TERT	12843975	3.2e-06	0.0539
679	Lung Cancer	LungCancer_pha003854	TERT	13735783	3.2e-06	0.0539
680	Lung Cancer	LungCancer_pha003856	TERT	6759190	1.43e-06	0.0244
681	Lung Cancer	LungCancer_pha003856	TERT	13718132	1.43e-06	0.0244
682	2hr Glucose	MAGIC_Scott_et_al_2hGlu_Jan2013	SELENOW	1673241	5.67e-09	0.000136
683	2hr Glucose	MAGIC_Scott_et_al_2hGlu_Jan2013	CKMT1B	1673265	1.82e-07	0.00218
684	2hr Glucose	MAGIC_Scott_et_al_2hGlu_Jan2013	ALKBH7	1673281	7.89e-07	0.00629
685	2hr Glucose	MAGIC_Scott_et_al_2hGlu_Jan2013	GPX4	1673301	1.51e-06	0.00904
686	2hr Glucose	MAGIC_Scott_et_al_2hGlu_Jan2013	NUDC	1673324	2.91e-06	0.0139
687	2hr Glucose	MAGIC_Scott_et_al_2hGlu_Jan2013	SYT4	1673338	4.38e-06	0.0175
688	2hr Glucose	MAGIC_Scott_et_al_2hGlu_Jan2013	RACK1	1673361	2.02e-05	0.0648
689	2hr Glucose	MAGIC_Scott_et_al_2hGlu_Jan2013	LAMB3	1673378	2.53e-05	0.0648
690	2hr Glucose	MAGIC_Scott_et_al_2hGlu_Jan2013	DPM2	1673392	2.55e-05	0.0648
691	2hr Glucose	MAGIC_Scott_et_al_2hGlu_Jan2013	SSR2	1673415	3.19e-05	0.0648
692	2hr Glucose	MAGIC_Scott_et_al_2hGlu_Jan2013	ITPK1	1673433	3.41e-05	0.0648
693	2hr Glucose	MAGIC_Scott_et_al_2hGlu_Jan2013	LPCAT4	1673444	3.47e-05	0.0648
694	2hr Glucose	MAGIC_Scott_et_al_2hGlu_Jan2013	SHISA4	1673465	3.53e-05	0.0648
695	2hr Glucose	MAGIC_Scott_et_al_2hGlu_Jan2013	BAG6	1673487	3.94e-05	0.0672
696	2hr Glucose	MAGIC_Scott_et_al_2hGlu_Jan2013	LHX2	1673512	4.22e-05	0.0672
697	2hr Glucose	MAGIC_Scott_et_al_2hGlu_Jan2013	SELENOW	13718140	5.67e-09	0.000136
698	2hr Glucose	MAGIC_Scott_et_al_2hGlu_Jan2013	CKMT1B	13718158	1.82e-07	0.00218
699	2hr Glucose	MAGIC_Scott_et_al_2hGlu_Jan2013	ALKBH7	13718169	7.89e-07	0.00629
700	2hr Glucose	MAGIC_Scott_et_al_2hGlu_Jan2013	GPX4	13718187	1.51e-06	0.00904
701	2hr Glucose	MAGIC_Scott_et_al_2hGlu_Jan2013	NUDC	13718208	2.91e-06	0.0139
702	2hr Glucose	MAGIC_Scott_et_al_2hGlu_Jan2013	SYT4	13718232	4.38e-06	0.0175
703	2hr Glucose	MAGIC_Scott_et_al_2hGlu_Jan2013	RACK1	13718262	2.02e-05	0.0648
704	2hr Glucose	MAGIC_Scott_et_al_2hGlu_Jan2013	LAMB3	13718284	2.53e-05	0.0648
705	2hr Glucose	MAGIC_Scott_et_al_2hGlu_Jan2013	DPM2	13718309	2.55e-05	0.0648
706	2hr Glucose	MAGIC_Scott_et_al_2hGlu_Jan2013	SSR2	13718352	3.19e-05	0.0648
707	2hr Glucose	MAGIC_Scott_et_al_2hGlu_Jan2013	ITPK1	13718375	3.41e-05	0.0648
708	2hr Glucose	MAGIC_Scott_et_al_2hGlu_Jan2013	LPCAT4	13718393	3.47e-05	0.0648
709	2hr Glucose	MAGIC_Scott_et_al_2hGlu_Jan2013	SHISA4	13718417	3.53e-05	0.0648
710	2hr Glucose	MAGIC_Scott_et_al_2hGlu_Jan2013	BAG6	13718446	3.94e-05	0.0672
711	2hr Glucose	MAGIC_Scott_et_al_2hGlu_Jan2013	LHX2	13718476	4.22e-05	0.0672
712	Fasting Glucose	MAGIC_Manning_et_al_FastingGlucose_MainEffect	CGREF1	48122	4.94e-07	0.00681
713	Fasting Glucose	MAGIC_Manning_et_al_FastingGlucose_MainEffect	G6PC2	48132	5.31e-07	0.00681
714	Fasting Glucose	MAGIC_Manning_et_al_FastingGlucose_MainEffect	IFT172	48150	6.46e-07	0.00681
715	Fasting Glucose	MAGIC_Manning_et_al_FastingGlucose_MainEffect	BABAM2	48163	2.37e-06	0.0142
716	Fasting Glucose	MAGIC_Manning_et_al_FastingGlucose_MainEffect	FNDC4	48190	2.63e-06	0.0142
717	Fasting Glucose	MAGIC_Manning_et_al_FastingGlucose_MainEffect	KHK	48203	3e-06	0.0142
718	Fasting Glucose	MAGIC_Manning_et_al_FastingGlucose_MainEffect	RGS8	48215	3.13e-06	0.0142
719	Fasting Glucose	MAGIC_Manning_et_al_FastingGlucose_MainEffect	CGREF1	13740992	4.94e-07	0.00681
720	Fasting Glucose	MAGIC_Manning_et_al_FastingGlucose_MainEffect	G6PC2	13741079	5.31e-07	0.00681
721	Fasting Glucose	MAGIC_Manning_et_al_FastingGlucose_MainEffect	IFT172	13741095	6.46e-07	0.00681
722	Fasting Glucose	MAGIC_Manning_et_al_FastingGlucose_MainEffect	BABAM2	13741111	2.37e-06	0.0142
723	Fasting Glucose	MAGIC_Manning_et_al_FastingGlucose_MainEffect	FNDC4	13741152	2.63e-06	0.0142
724	Fasting Glucose	MAGIC_Manning_et_al_FastingGlucose_MainEffect	KHK	13741178	3e-06	0.0142
725	Fasting Glucose	MAGIC_Manning_et_al_FastingGlucose_MainEffect	RGS8	13741191	3.13e-06	0.0142
726	Fasting Glucose	MAGIC_Scott_et_al_FG_Jan2013	IFT172	14279954	1.64e-07	0.00376
727	Fasting Glucose	MAGIC_Scott_et_al_FG_Jan2013	BABAM2	14279955	3.14e-07	0.00376
728	Fasting Glucose	MAGIC_Scott_et_al_FG_Jan2013	CGREF1	14279956	1.4e-06	0.0112
729	Fasting Insulin	MAGIC_ln_FastingInsulin	MON1A	7273556	3.14e-06	0.0986
730	Fasting Insulin	MAGIC_ln_fastingProinsulin	FAM180B	1480136	1.98e-07	0.00195
731	Fasting Insulin	MAGIC_ln_fastingProinsulin	NDUFS3	1480147	2.09e-07	0.00195
732	Fasting Insulin	MAGIC_ln_fastingProinsulin	SLC39A13	1480168	2.89e-07	0.00195
733	Fasting Insulin	MAGIC_ln_fastingProinsulin	ARHGAP1	1480179	2.96e-07	0.00195
734	Fasting Insulin	MAGIC_ln_fastingProinsulin	PDE2A	1480195	3.34e-07	0.00195
735	Fasting Insulin	MAGIC_ln_fastingProinsulin	MTCH2	1480216	3.71e-07	0.00195
736	Fasting Insulin	MAGIC_ln_fastingProinsulin	FNBP4	1480229	5.09e-07	0.00229
737	Fasting Insulin	MAGIC_ln_fastingProinsulin	RP11-750H9.5	1480233	2.15e-06	0.00848
738	Fasting Insulin	MAGIC_Manning_et_al_lnFastingInsulin_Interaction	GBP4	10506403	7.12e-07	0.0225
739	Fasting Insulin	MAGIC_Scott_et_al_FI_adjBMI_Jan2013	SELENOW	1457799	5.32e-09	0.000127
740	Fasting Insulin	MAGIC_Scott_et_al_FI_adjBMI_Jan2013	CKMT1B	1457833	6.21e-07	0.00743
741	Fasting Insulin	MAGIC_Scott_et_al_FI_adjBMI_Jan2013	ALKBH7	1457849	1.15e-06	0.00811
742	Fasting Insulin	MAGIC_Scott_et_al_FI_adjBMI_Jan2013	GPX4	1457877	1.36e-06	0.00811
743	Fasting Insulin	MAGIC_Scott_et_al_FI_adjBMI_Jan2013	NUDC	1457895	2.59e-06	0.0124
744	Fasting Insulin	MAGIC_Scott_et_al_FI_adjBMI_Jan2013	BAG6	1457914	9.4e-06	0.0363
745	Fasting Insulin	MAGIC_Scott_et_al_FI_adjBMI_Jan2013	SYT4	1457921	1.16e-05	0.0363
746	Fasting Insulin	MAGIC_Scott_et_al_FI_adjBMI_Jan2013	LHX2	1457937	1.21e-05	0.0363
747	Fasting Insulin	MAGIC_Scott_et_al_FI_adjBMI_Jan2013	RACK1	1457954	2.74e-05	0.0704
748	Fasting Insulin	MAGIC_Scott_et_al_FI_adjBMI_Jan2013	SHISA4	1457962	2.94e-05	0.0704
749	Fasting Insulin	MAGIC_Scott_et_al_FI_adjBMI_Jan2013	LAMB3	1457971	3.25e-05	0.0708
750	Fasting Insulin	MAGIC_Scott_et_al_FI_adjBMI_Jan2013	SSR2	1457981	3.66e-05	0.073
751	Fasting Insulin	MAGIC_Scott_et_al_FI_adjBMI_Jan2013	RASAL1	1457993	4.9e-05	0.0902
752	Insulin Secretion	MAGIC_INSULIN_SECRETION_AUCins_AUCgluc_for_release_HMrel27	HSPA6	8818976	9.87e-07	0.031
753	Insulin Secretion	MAGIC_INSULIN_SECRETION_AUCins_for_release_HMrel27	HSPA6	48596	1.13e-06	0.0354
754	Insulin Secretion	MAGIC_INSULIN_SECRETION_CIR_ISI_for_release_HMrel27	HHEX	2724860	1.98e-06	0.0622
755	Insulin Secretion	MAGIC_INSULIN_SECRETION_Incr30_for_release_HMrel27	SYMPK	3584213	1.8e-06	0.0565
756	Insulin Secretion	MAGIC_INSULIN_SECRETION_Incr30_for_release_HMrel27	AC074212.6	3584253	4.25e-06	0.0667
757	Insulin Secretion	MAGIC_INSULIN_SECRETION_Ins30_for_release_HMrel27	SYMPK	12808788	4e-07	0.0125
758	Insulin Secretion	MAGIC_INSULIN_SECRETION_Ins30_for_release_HMrel27	AC074212.6	12808792	4.25e-06	0.0667
759	Neuroticism	Neuroticism_SSGAC_Okbey_2016	PPP1R3B	12295221	1.9e-14	6.09e-10
760	Neuroticism	Neuroticism_SSGAC_Okbey_2016	FDFT1	12295268	4.91e-14	7.9e-10
761	Neuroticism	Neuroticism_SSGAC_Okbey_2016	MTMR9	12295313	1.31e-13	1.28e-09
762	Neuroticism	Neuroticism_SSGAC_Okbey_2016	NEIL2	12295364	1.6e-13	1.28e-09
763	Neuroticism	Neuroticism_SSGAC_Okbey_2016	CLDN23	12295441	2.83e-12	1.82e-08
764	Neuroticism	Neuroticism_SSGAC_Okbey_2016	MSRA	12295473	3.92e-12	2.1e-08
765	Neuroticism	Neuroticism_SSGAC_Okbey_2016	AF131215.5	12295485	2.91e-11	1.33e-07
766	Neuroticism	Neuroticism_SSGAC_Okbey_2016	MFHAS1	12295539	3.41e-11	1.37e-07
767	Neuroticism	Neuroticism_SSGAC_Okbey_2016	SLC35G5	12295561	3.63e-08	0.00013
768	Neuroticism	Neuroticism_SSGAC_Okbey_2016	ENPP7P12	12295588	1.69e-07	0.000543
769	Neuroticism	Neuroticism_SSGAC_Okbey_2016	XKR6	12295628	1.9e-07	0.000554
770	Neuroticism	Neuroticism_SSGAC_Okbey_2016	CTSB	12295670	2.55e-07	0.000684
771	Neuroticism	Neuroticism_SSGAC_Okbey_2016	FAM85B	12295714	8.43e-07	0.00208
772	Neuroticism	Neuroticism_SSGAC_Okbey_2016	AF131215.2	12295798	9.96e-07	0.00229
773	Neuroticism	Neuroticism_SSGAC_Okbey_2016	RP11-62H7.2	12295838	1.12e-06	0.00241
774	Neuroticism	Neuroticism_SSGAC_Okbey_2016	FAM66D	12295869	1.65e-06	0.00332
775	Neuroticism	Neuroticism_SSGAC_Okbey_2016	OR8B2	12295881	1.9e-06	0.00358
776	Neuroticism	Neuroticism_SSGAC_Okbey_2016	DND1	12295900	2.18e-06	0.00389
777	Neuroticism	Neuroticism_SSGAC_Okbey_2016	ALG1L13P	12295945	2.62e-06	0.00443
778	Neuroticism	Neuroticism_SSGAC_Okbey_2016	AF131215.9	12296064	2.98e-06	0.00479
779	Neuroticism	Neuroticism_SSGAC_Okbey_2016	ERI1	12296119	3.45e-06	0.00528
780	Neuroticism	Neuroticism_SSGAC_Okbey_2016	RPS3AP34	12296147	4.31e-06	0.00626
781	Neuroticism	Neuroticism_SSGAC_Okbey_2016	RP11-10A14.3	12296167	4.48e-06	0.00626
782	Neuroticism	Neuroticism_SSGAC_Okbey_2016	RP11-259G18.1	12296720	5.87e-06	0.00786
783	Neuroticism	Neuroticism_SSGAC_Okbey_2016	AF131216.5	12296783	9.99e-06	0.0128
784	Neuroticism	Neuroticism_SSGAC_Okbey_2016	TNP2	12296798	1.13e-05	0.014
785	Neuroticism	Neuroticism_SSGAC_Okbey_2016	FAM86B3P	12296850	1.31e-05	0.0156
786	Neuroticism	Neuroticism_SSGAC_Okbey_2016	CTA-398F10.2	12296933	1.42e-05	0.0163
787	Neuroticism	Neuroticism_SSGAC_Okbey_2016	FAM167A	12296979	2.12e-05	0.0235
788	Neuroticism	Neuroticism_SSGAC_Okbey_2016	BOLA2	12297010	3.24e-05	0.0347
789	Neuroticism	Neuroticism_SSGAC_Okbey_2016	RP11-10A14.5	12297043	3.42e-05	0.0355
790	Neuroticism	Neuroticism_SSGAC_Okbey_2016	ACSL4	12297051	4.19e-05	0.0414
791	Neuroticism	Neuroticism_SSGAC_Okbey_2016	BLK	12297094	4.25e-05	0.0414
792	Neuroticism	Neuroticism_SSGAC_Okbey_2016	TDH	12297153	5.75e-05	0.0544
793	Neuroticism	Neuroticism_SSGAC_Okbey_2016	CTD-3023L14.2	12297169	6.47e-05	0.0594
794	Neuroticism	Neuroticism_SSGAC_Okbey_2016	RP11-259G18.2	12297449	7.59e-05	0.0677
795	Neuroticism	Neuroticism_SSGAC_Okbey_2016	RP11-419I17.1	12297501	8.1e-05	0.0703
796	Neuroticism	Neuroticism_SSGAC_Okbey_2016	KANSL1	12297569	9.5e-05	0.0804
797	Neuroticism	Neuroticism_SSGAC_Okbey_2016	THAP2	12297596	0.000102	0.0837
798	Neuroticism	Neuroticism_SSGAC_Okbey_2016	ADM	12297614	0.000109	0.0879
799	Neuroticism	Neuroticism_SSGAC_Okbey_2016	ARHGAP27	12297751	0.000113	0.0887
800	Neuroticism	Neuroticism_SSGAC_Okbey_2016	SLC25A23	12297775	0.000127	0.097
801	Obesity	GIANT_OBESITY_CLASS1_Berndt2013	NEGR1	5203858	1.35e-06	0.0421
802	Obesity	GIANT_OBESITY_CLASS2_Berndt2013	NEGR1	12154499	2.32e-06	0.0392
803	Obesity	GIANT_OBESITY_CLASS2_Berndt2013	FUBP1	12154515	2.51e-06	0.0392
804	Osteoporosis	GEFOS2_FNBMD_POOLED_GC	NUDT11	8653705	6.65e-07	0.0209
805	Osteoporosis	GEFOS2_LSBMD_POOLED_GC	HOXC9	11246423	1.03e-06	0.0322
806	Osteoporosis	GEFOS2_LSBMD_WOMEN_GC	HOXC9	5354440	3.19e-06	0.1
807	Overweight	GIANT_OVERWEIGHT_Stage1_Berndt2013	NEGR1	12101092	5.98e-07	0.0187
808	Parkinson	Parkinson_pha002868	ARL17B	3439985	1.76e-09	5.32e-05
809	Parkinson	Parkinson_pha002868	KANSL1-AS1	3440035	3.51e-09	5.32e-05
810	Parkinson	Parkinson_pha002868	DND1	3440045	3.44e-07	0.00347
811	Parkinson	Parkinson_pha002868	RDM1	3440054	7.69e-07	0.00583
812	Parkinson	Parkinson_pha002868	RP11-231C14.4	3440060	4.34e-06	0.0263
813	Parkinson	Parkinson_pha002868	RP11-259G18.3	3440098	1.14e-05	0.0565
814	Parkinson	Parkinson_pha002868	RP11-259G18.1	3440178	1.3e-05	0.0565
815	Parkinson	Parkinson_pha002868	RP11-707O23.5	3440261	2.34e-05	0.0879
816	Parkinson	Parkinson_pha002868	PLEKHM1	3440359	2.61e-05	0.0879
817	Five Psychiatric Diseases	PGC.cross.full_2013	MARCKSL1P1	12841165	9.4e-09	0.000294
818	Five Psychiatric Diseases	PGC.cross.full_2013	ITIH4	12841197	3.16e-07	0.00338
819	Five Psychiatric Diseases	PGC.cross.full_2013	NT5C2	12841223	3.24e-07	0.00338
820	Five Psychiatric Diseases	PGC.cross.full_2013	ARL3	12841236	4.49e-06	0.0351
821	Five Psychiatric Diseases	PGC.cross.full_2013	AF088735	12841242	6.25e-06	0.0369
822	Five Psychiatric Diseases	PGC.cross.full_2013	ATP5MD	12841255	7.08e-06	0.0369
823	Five Psychiatric Diseases	PGC.cross.full_2013	SFXN2	12841276	1.62e-05	0.0703
824	Five Psychiatric Diseases	PGC.cross.full_2013	PBRM1	12841289	2.02e-05	0.0703
825	Five Psychiatric Diseases	PGC.cross.full_2013	RP5-966M1.5	12841292	2.02e-05	0.0703
826	Five Psychiatric Diseases	PGC.cross.full_2013	SPCS1	12841300	2.42e-05	0.0756
827	Five Psychiatric Diseases	PGC.cross.full_2013	BCAP29	12841313	3.07e-05	0.0873
828	Pubertal Growth Late Adolescence	Pubertal_growth_PGF_PGM_combined	ADCY3	5809461	7.97e-07	0.0249
829	Pubertal Growth Late Adolescence	Pubertal_growth_takeoff_10F_12M_combined	ZBTB38	6190125	1.1e-06	0.0341
830	Rheumatoid Arthritis	RA_GWASmeta_Asian	AL133458.1	10922698	8.8e-08	0.00175
831	Rheumatoid Arthritis	RA_GWASmeta_Asian	HIST1H2BD	10922719	1.21e-07	0.00175
832	Rheumatoid Arthritis	RA_GWASmeta_Asian	HLA-DPB2	10922896	1.67e-07	0.00175
833	Rheumatoid Arthritis	RA_GWASmeta_Asian	RNASET2	10922936	6.78e-07	0.00531
834	Rheumatoid Arthritis	RA_GWASmeta_Asian	HLA-DOB	10922950	1.21e-06	0.00759
835	Rheumatoid Arthritis	RA_GWASmeta_Asian	HMGN4	10922987	5.5e-06	0.0251
836	Rheumatoid Arthritis	RA_GWASmeta_Asian	BAK1	10923052	7.13e-06	0.0251
837	Rheumatoid Arthritis	RA_GWASmeta_Asian	IP6K3	10923099	7.21e-06	0.0251
838	Rheumatoid Arthritis	RA_GWASmeta_Asian	HLA-DMA	10923121	7.22e-06	0.0251
839	Rheumatoid Arthritis	RA_GWASmeta_Asian	TAPBP	10923168	1.33e-05	0.039
840	Rheumatoid Arthritis	RA_GWASmeta_Asian	HLA-DRB5	10923199	1.37e-05	0.039
841	Rheumatoid Arthritis	RA_GWASmeta_Asian	HLA-DPA1	10923342	1.64e-05	0.0428
842	Rheumatoid Arthritis	RA_GWASmeta_Asian	HIST1H2AC	10923360	3.74e-05	0.0893
843	Rheumatoid Arthritis	RA_GWASmeta_Asian	COL11A2	10923450	3.99e-05	0.0893
844	Rheumatoid Arthritis	RA_GWASmeta_Asian	ZNF322	10923475	4.52e-05	0.0944
845	Rheumatoid Arthritis	RA_GWASmeta_European_v2	HLA-DRB5	7170151	8.77e-12	2.8e-07
846	Rheumatoid Arthritis	RA_GWASmeta_European_v2	ITPR3	7170219	2.27e-11	3.62e-07
847	Rheumatoid Arthritis	RA_GWASmeta_European_v2	HLA-DPA1	7170411	1.47e-10	1.56e-06
848	Rheumatoid Arthritis	RA_GWASmeta_European_v2	HLA-DQA1	7170437	8.68e-10	5.61e-06
849	Rheumatoid Arthritis	RA_GWASmeta_European_v2	HLA-DPB1	7170572	8.78e-10	5.61e-06
850	Rheumatoid Arthritis	RA_GWASmeta_European_v2	HLA-DPB2	7170799	2.05e-09	1.09e-05
851	Rheumatoid Arthritis	RA_GWASmeta_European_v2	DAXX	7170849	4.47e-09	1.92e-05
852	Rheumatoid Arthritis	RA_GWASmeta_European_v2	TAPBP	7170913	4.81e-09	1.92e-05
853	Rheumatoid Arthritis	RA_GWASmeta_European_v2	BAK1	7170995	1.8e-08	6.39e-05
854	Rheumatoid Arthritis	RA_GWASmeta_European_v2	HLA-DOA	7171018	8.59e-07	0.00274
855	Rheumatoid Arthritis	RA_GWASmeta_European_v2	PSMB9	7171051	1.27e-06	0.00304
856	Rheumatoid Arthritis	RA_GWASmeta_European_v2	HCG24	7171119	1.3e-06	0.00304
857	Rheumatoid Arthritis	RA_GWASmeta_European_v2	PHF1	7171132	1.31e-06	0.00304
858	Rheumatoid Arthritis	RA_GWASmeta_European_v2	RXRB	7171228	1.33e-06	0.00304
859	Rheumatoid Arthritis	RA_GWASmeta_European_v2	ZBTB22	7171253	1.44e-06	0.00308
860	Rheumatoid Arthritis	RA_GWASmeta_European_v2	RGL2	7171268	1.8e-06	0.0036
861	Rheumatoid Arthritis	RA_GWASmeta_European_v2	TNFSF11	7171294	2.09e-06	0.00393
862	Rheumatoid Arthritis	RA_GWASmeta_European_v2	TAP2	7171317	2.59e-06	0.0046
863	Rheumatoid Arthritis	RA_GWASmeta_European_v2	HLA-DRB4	7171327	2.99e-06	0.00502
864	Rheumatoid Arthritis	RA_GWASmeta_European_v2	CUTA	7171369	3.3e-06	0.00527
865	Rheumatoid Arthritis	RA_GWASmeta_European_v2	CUL5	7171417	2.13e-05	0.0324
866	Rheumatoid Arthritis	RA_GWASmeta_European_v2	IP6K3	7171446	2.5e-05	0.0362
867	Rheumatoid Arthritis	RA_GWASmeta_European_v2	HMGA1	7171467	3.41e-05	0.046
868	Rheumatoid Arthritis	RA_GWASmeta_European_v2	RPS26P11	7171480	3.6e-05	0.046
869	Rheumatoid Arthritis	RA_GWASmeta_European_v2	RPS26P47	7171490	3.6e-05	0.046
870	Rheumatoid Arthritis	RA_GWASmeta_European_v2	HLA-DMA	7171511	3.98e-05	0.0489
871	Rheumatoid Arthritis	RA_GWASmeta_European_v2	GSDMB	7171541	4.71e-05	0.0552
872	Rheumatoid Arthritis	RA_GWASmeta_European_v2	HLA-DQB1	7171583	4.84e-05	0.0552
873	Rheumatoid Arthritis	RA_GWASmeta_European_v2	HSD17B8	7171753	5.95e-05	0.0655
874	Rheumatoid Arthritis	RA_GWASmeta_European_v2	MEGF8	7171788	6.94e-05	0.0719
875	Rheumatoid Arthritis	RA_GWASmeta_European_v2	HIPK1	7171800	6.98e-05	0.0719
876	Rheumatoid Arthritis	RA_GWASmeta_European_v2	HSPA12B	7171827	7.24e-05	0.0723
877	Rheumatoid Arthritis	RA_GWASmeta_European_v2	WDR46	7171877	9.53e-05	0.0922
878	Rheumatoid Arthritis	RA_GWASmeta_European_v2	H1FX	7171907	0.000106	0.0992
879	Rheumatoid Arthritis	RA_GWASmeta_TransEthnic	HLA-DRB5	10671044	9.21e-12	2.95e-07
880	Rheumatoid Arthritis	RA_GWASmeta_TransEthnic	HLA-DPA1	10671247	5.09e-11	8.16e-07
881	Rheumatoid Arthritis	RA_GWASmeta_TransEthnic	ITPR3	10671301	3.94e-10	4.2e-06
882	Rheumatoid Arthritis	RA_GWASmeta_TransEthnic	HLA-DPB2	10671478	2.06e-09	1.65e-05
883	Rheumatoid Arthritis	RA_GWASmeta_TransEthnic	TAPBP	10671541	1.09e-08	6.01e-05
884	Rheumatoid Arthritis	RA_GWASmeta_TransEthnic	DAXX	10671572	1.13e-08	6.01e-05
885	Rheumatoid Arthritis	RA_GWASmeta_TransEthnic	HLA-DQA1	10671607	1.73e-08	7.93e-05
886	Rheumatoid Arthritis	RA_GWASmeta_TransEthnic	HLA-DPB1	10671715	2.17e-08	8.68e-05
887	Rheumatoid Arthritis	RA_GWASmeta_TransEthnic	BAK1	10671792	3.4e-07	0.00121
888	Rheumatoid Arthritis	RA_GWASmeta_TransEthnic	RGL2	10671813	3.87e-07	0.00124
889	Rheumatoid Arthritis	RA_GWASmeta_TransEthnic	AL133458.1	10671841	1.2e-06	0.00349
890	Rheumatoid Arthritis	RA_GWASmeta_TransEthnic	PHF1	10671853	1.63e-06	0.00434
891	Rheumatoid Arthritis	RA_GWASmeta_TransEthnic	ZBTB22	10671870	1.94e-06	0.00478
892	Rheumatoid Arthritis	RA_GWASmeta_TransEthnic	PSMB9	10671897	2.42e-06	0.00535
893	Rheumatoid Arthritis	RA_GWASmeta_TransEthnic	CUTA	10671928	2.5e-06	0.00535
894	Rheumatoid Arthritis	RA_GWASmeta_TransEthnic	RXRB	10672032	3.58e-06	0.00717
895	Rheumatoid Arthritis	RA_GWASmeta_TransEthnic	HLA-DRB4	10672055	4.93e-06	0.00928
896	Rheumatoid Arthritis	RA_GWASmeta_TransEthnic	HCG24	10672088	5.59e-06	0.00994
897	Rheumatoid Arthritis	RA_GWASmeta_TransEthnic	HLA-DOA	10672123	7.84e-06	0.0132
898	Rheumatoid Arthritis	RA_GWASmeta_TransEthnic	CUL5	10672132	1.56e-05	0.0246
899	Rheumatoid Arthritis	RA_GWASmeta_TransEthnic	HMGA1	10672150	1.64e-05	0.0246
900	Rheumatoid Arthritis	RA_GWASmeta_TransEthnic	GSDMB	10672173	1.71e-05	0.0246
901	Rheumatoid Arthritis	RA_GWASmeta_TransEthnic	RNASET2	10672199	1.83e-05	0.0246
902	Rheumatoid Arthritis	RA_GWASmeta_TransEthnic	RPS26P11	10672216	1.92e-05	0.0246
903	Rheumatoid Arthritis	RA_GWASmeta_TransEthnic	RPS26P47	10672229	1.92e-05	0.0246
904	Rheumatoid Arthritis	RA_GWASmeta_TransEthnic	HLA-DQB2	10672264	2.21e-05	0.0272
905	Rheumatoid Arthritis	RA_GWASmeta_TransEthnic	IP6K3	10672300	3.56e-05	0.0422
906	Rheumatoid Arthritis	RA_GWASmeta_TransEthnic	LOC153910	10672323	3.9e-05	0.0446
907	Rheumatoid Arthritis	RA_GWASmeta_TransEthnic	MFAP2	10672344	5.41e-05	0.0598
908	Rheumatoid Arthritis	RA_GWASmeta_TransEthnic	CACNB1	10672365	5.82e-05	0.0621
909	Rheumatoid Arthritis	RA_GWASmeta_TransEthnic	HLA-DQB1	10672399	6.59e-05	0.0681
910	Rheumatoid Arthritis	RA_GWASmeta_TransEthnic	RPS26P10	10672418	6.98e-05	0.0698
911	Rheumatoid Arthritis	RA_GWASmeta_TransEthnic	ERBB2	10672437	7.33e-05	0.0711
912	Rheumatoid Arthritis	RA_GWASmeta_TransEthnic	HSD17B8	10672569	8.46e-05	0.0797
913	Rheumatoid Arthritis	RA_GWASmeta_TransEthnic	RP3-508I15.9	10672588	8.86e-05	0.0811
914	Rheumatoid Arthritis	RA_GWASmeta_TransEthnic	WDR46	10672625	9.23e-05	0.0821
915	Rheumatoid Arthritis	RA_GWASmeta_TransEthnic	RPS18	10672681	0.000111	0.0895
916	Rheumatoid Arthritis	RA_GWASmeta_TransEthnic	TAP2	10672702	0.000112	0.0895
917	Rheumatoid Arthritis	RA_GWASmeta_TransEthnic	HSPA12B	10672724	0.000113	0.0895
918	Rheumatoid Arthritis	RA_GWASmeta_TransEthnic	COL11A2	10672804	0.000116	0.0895
919	Rheumatoid Arthritis	RA_GWASmeta_TransEthnic	VPS52	10672835	0.000118	0.0895
920	Rheumatoid Arthritis	RA_GWASmeta_TransEthnic	TSFM	10672858	0.00012	0.0895
921	Rheumatoid Arthritis	RA_GWASmeta_TransEthnic	H1FX	10672881	0.00012	0.0895
922	Rheumatoid Arthritis	RA_GWASmeta_TransEthnic	RP5-1073O3.7	10672897	0.000127	0.092
923	Rheumatoid Arthritis	RA_GWASmeta_TransEthnic	HIST1H2AC	10672920	0.000129	0.092
924	Rheumatoid Arthritis	RA_GWASmeta2_20090505	HLA-DPB2	7196813	2.68e-14	8.43e-10
925	Rheumatoid Arthritis	RA_GWASmeta2_20090505	HLA-DPA1	7197081	3.42e-12	5.37e-08
926	Rheumatoid Arthritis	RA_GWASmeta2_20090505	HLA-DRB5	7197129	2.12e-09	2.22e-05
927	Rheumatoid Arthritis	RA_GWASmeta2_20090505	ITPR3	7197170	4.99e-09	3.93e-05
928	Rheumatoid Arthritis	RA_GWASmeta2_20090505	HLA-DPB1	7197320	8.32e-09	5.24e-05
929	Rheumatoid Arthritis	RA_GWASmeta2_20090505	DAXX	7197370	1.67e-08	8.76e-05
930	Rheumatoid Arthritis	RA_GWASmeta2_20090505	HLA-DOA	7197393	2.16e-07	0.000972
931	Rheumatoid Arthritis	RA_GWASmeta2_20090505	RXRB	7197493	3.36e-07	0.00132
932	Rheumatoid Arthritis	RA_GWASmeta2_20090505	PHF1	7197513	7.64e-07	0.00267
933	Rheumatoid Arthritis	RA_GWASmeta2_20090505	BAK1	7197590	1.37e-06	0.00385
934	Rheumatoid Arthritis	RA_GWASmeta2_20090505	TAPBP	7197667	1.41e-06	0.00385
935	Rheumatoid Arthritis	RA_GWASmeta2_20090505	HLA-DRB4	7197676	1.47e-06	0.00385
936	Rheumatoid Arthritis	RA_GWASmeta2_20090505	ZBTB22	7197692	1.9e-06	0.0046
937	Rheumatoid Arthritis	RA_GWASmeta2_20090505	RGL2	7197713	4.6e-06	0.0103
938	Rheumatoid Arthritis	RA_GWASmeta2_20090505	PSMB9	7197733	5.5e-06	0.0115
939	Rheumatoid Arthritis	RA_GWASmeta2_20090505	WDR46	7197793	9.17e-06	0.018
940	Rheumatoid Arthritis	RA_GWASmeta2_20090505	HIPK1	7197810	1.04e-05	0.0193
941	Rheumatoid Arthritis	RA_GWASmeta2_20090505	MAGI3	7197836	1.41e-05	0.0246
942	Rheumatoid Arthritis	RA_GWASmeta2_20090505	CUTA	7197860	1.69e-05	0.028
943	Rheumatoid Arthritis	RA_GWASmeta2_20090505	DCLRE1B	7197876	1.96e-05	0.0294
944	Rheumatoid Arthritis	RA_GWASmeta2_20090505	TBC1D22B	7197895	1.96e-05	0.0294
945	Rheumatoid Arthritis	RA_GWASmeta2_20090505	TAP2	7197911	4.11e-05	0.0588
946	Rheumatoid Arthritis	RA_GWASmeta2_20090505	HLA-DQA1	7197950	5.43e-05	0.0742
947	Rheumatoid Arthritis	RA_GWASmeta2_20090505	HLA-DMA	7197968	5.95e-05	0.078
948	Schizophrenia	McCarroll_12_SCZ_HM	BTN3A2	3572215	4.7e-11	1.47e-06
949	Schizophrenia	McCarroll_12_SCZ_HM	NT5C2	3572262	9.75e-09	0.000152
950	Schizophrenia	McCarroll_12_SCZ_HM	BTN1A1	3572274	6.34e-07	0.0066
951	Schizophrenia	McCarroll_12_SCZ_HM	HIST1H4C	3572281	3.34e-06	0.0261
952	Schizophrenia	McCarroll_12_SCZ_HM	HLA-DQA2	3572302	9.15e-06	0.0571
953	Schizophrenia	McCarroll_12_SCZ_HM	WDR82	3572313	1.71e-05	0.0762
954	Schizophrenia	McCarroll_12_SCZ_HM	MARCKSL1P1	3572325	2.1e-05	0.0762
955	Schizophrenia	McCarroll_12_SCZ_HM	HLA-DRB4	3572330	2.17e-05	0.0762
956	Schizophrenia	McCarroll_12_SCZ_HM	CNNM2	3572339	2.2e-05	0.0762
957	Schizophrenia	McCarroll_12_SCZ_HM	PPP1R3B	3572367	2.93e-05	0.0916
958	Schizophrenia	McCarroll_12_SCZ_HM	ZKSCAN4	3572395	3.27e-05	0.0928
959	Schizophrenia	PGC.cross.SCZ17_2013	BTN3A2	6947871	4.15e-09	6.96e-05
960	Schizophrenia	PGC.cross.SCZ17_2013	MARCKSL1P1	6947872	4.45e-09	6.96e-05
961	Schizophrenia	PGC.cross.SCZ17_2013	C11orf24	6947873	8.23e-08	0.000858
962	Schizophrenia	PGC.cross.SCZ17_2013	BTN1A1	6947874	1.64e-07	0.00128
963	Schizophrenia	PGC.cross.SCZ17_2013	NT5C2	6947875	7.33e-07	0.00458
964	Schizophrenia	PGC.cross.SCZ17_2013	ATP5MD	6947876	4.53e-06	0.0236
965	Schizophrenia	PGC.cross.SCZ17_2013	ARL3	6947877	1.05e-05	0.047
966	Schizophrenia	PGC.cross.SCZ17_2013	HIST1H4C	6947878	1.51e-05	0.0536
967	Schizophrenia	PGC.cross.SCZ17_2013	MCHR1	6947879	1.54e-05	0.0536
968	Schizophrenia	Schizophrenia_PGC_SCZ1_2012	BTN3A2	10514167	1.6e-11	5.01e-07
969	Schizophrenia	Schizophrenia_PGC_SCZ1_2012	MARCKSL1P1	10514182	2.42e-09	3.79e-05
970	Schizophrenia	Schizophrenia_PGC_SCZ1_2012	BTN1A1	10514194	1.79e-07	0.00187
971	Schizophrenia	Schizophrenia_PGC_SCZ1_2012	NT5C2	10514214	6.9e-07	0.0054
972	Schizophrenia	Schizophrenia_PGC_SCZ1_2012	ATP5MD	10514230	1.32e-06	0.00823
973	Schizophrenia	Schizophrenia_PGC_SCZ1_2012	ARL3	10514244	2.54e-06	0.0132
974	Schizophrenia	Schizophrenia_PGC_SCZ1_2012	HIST1H4C	10514260	5.77e-06	0.0258
975	Schizophrenia	Schizophrenia_PGC_SCZ1_2012	HFE	10514284	1.56e-05	0.061
976	Schizophrenia	Schizophrenia_PGC_SCZ1_2012	RP11-680F20.11	10514302	2.08e-05	0.0722
977	Schizophrenia	Schizophrenia_PGC_SCZ1_2012	GTF2A1L	10514320	2.72e-05	0.0852
978	Schizophrenia	Schizophrenia_PGC_SCZ1_SWE_2013	BTN3A2	12198023	3.53e-07	0.00768
979	Schizophrenia	Schizophrenia_PGC_SCZ1_SWE_2013	MARCKSL1P1	12198034	4.69e-07	0.00768
980	Schizophrenia	Schizophrenia_PGC_SCZ1_SWE_2013	ARL3	12198051	9.56e-07	0.00886
981	Schizophrenia	Schizophrenia_PGC_SCZ1_SWE_2013	ATP5MD	12198065	1.08e-06	0.00886
982	Schizophrenia	Schizophrenia_PGC_SCZ1_SWE_2013	NT5C2	12198084	7.46e-06	0.0488
983	Schizophrenia	Schizophrenia_PGC_SCZ1_SWE_2013	RP11-724N1.1	12198097	9.96e-06	0.0543
984	Schizophrenia	Schizophrenia_PGC_SCZ1_SWE_2013	WBP1L	12198113	1.24e-05	0.0578
985	Schizophrenia	Schizophrenia_PGC_SCZ1_SWE_2013	BTN1A1	12198117	2.2e-05	0.0901
986	Schizophrenia	Schizophrenia_PGC_SCZ2	BTN3A2	12072847	2.69e-10	8.7e-06
987	Schizophrenia	Schizophrenia_PGC_SCZ2	ARL3	12072852	1.87e-06	0.0215
988	Schizophrenia	Schizophrenia_PGC_SCZ2	BTN1A1	12072856	2e-06	0.0215
989	Schizophrenia	Schizophrenia_PGC_SCZ2	HLA-DQA2	12072860	3.82e-06	0.0268
990	Schizophrenia	Schizophrenia_PGC_SCZ2	MARCKSL1P1	12072865	4.15e-06	0.0268
991	Schizophrenia	Schizophrenia_PGC_SCZ2	HLA-DQA1	12072872	9.78e-06	0.0528
992	Schizophrenia	Schizophrenia_PGC_SCZ2	PPP1R3B	12072878	1.29e-05	0.0541
993	Schizophrenia	Schizophrenia_PGC_SCZ2	HIST1H4C	12072882	1.34e-05	0.0541
994	Schizophrenia	Schizophrenia_PGC_SCZ2	RP11-282O18.3	12072888	1.57e-05	0.0564
995	Schizophrenia	Schizophrenia_PGC_SCZ2	LEMD2	12072892	1.74e-05	0.0564
996	Schizophrenia	Schizophrenia_PGC_SCZ2	ABCB9	12072896	2.97e-05	0.0875
997	Schizophrenia	Schizophrenia_PGC_SCZ2	AC064852.5	12072900	3.44e-05	0.0928
998	Subjective Well Being	subjective_well_being_SSGAC_Okbey_2016	ZFAS1	11323562	3.09e-08	0.000917
999	Subjective Well Being	subjective_well_being_SSGAC_Okbey_2016	ZNFX1	11323570	1.62e-06	0.024
1000	Triglycerides	Triglycerides_Willer_2013	TAGLN	9526693	1.45e-09	3.07e-05
1001	Triglycerides	Triglycerides_Willer_2013	SIDT2	9526705	1.96e-09	3.07e-05
1002	Triglycerides	Triglycerides_Willer_2013	DOCK7	9526711	1.6e-08	0.000167
1003	Triglycerides	Triglycerides_Willer_2013	BABAM2	9526719	2.38e-08	0.000186
1004	Triglycerides	Triglycerides_Willer_2013	MLXIPL	9526725	3.18e-08	0.000199
1005	Triglycerides	Triglycerides_Willer_2013	FNDC4	9526735	1.86e-06	0.00973
1006	Triglycerides	Triglycerides_Willer_2013	RP11-109L13.1	9526754	2.28e-06	0.0102
1007	Triglycerides	Triglycerides_Willer_2013	AC093690.1	9526759	3.6e-06	0.0141
1008	Triglycerides	Triglycerides_Willer_2013	ANGPTL3	9526763	4.13e-06	0.0144
1009	Triglycerides	Triglycerides_Willer_2013	CGREF1	9526767	6.1e-06	0.0191
1010	Triglycerides	Triglycerides_Willer_2013	RP11-397E7.4	9526775	9.02e-06	0.0257
1011	Triglycerides	Triglycerides_Willer_2013	MPV17	9526781	1.25e-05	0.0308
1012	Triglycerides	Triglycerides_Willer_2013	PCSK7	9526788	1.28e-05	0.0308
1013	Triglycerides	Triglycerides_Willer_2013	RBKS	9526792	1.49e-05	0.0332
1014	Triglycerides	Triglycerides_Willer_2013	NEIL2	9526813	1.95e-05	0.0407
1015	Triglycerides	Triglycerides_Willer_2013	GCKR	9526821	2.19e-05	0.0412
1016	Triglycerides	Triglycerides_Willer_2013	AC012065.7	9526829	2.23e-05	0.0412
1017	Triglycerides	Triglycerides_Willer_2013	KHK	9526835	2.88e-05	0.0477
1018	Triglycerides	Triglycerides_Willer_2013	SNX17	9526845	2.89e-05	0.0477
1019	Triglycerides	Triglycerides_Willer_2013	CSGALNACT1	9526861	3.9e-05	0.061
1020	Triglycerides	Triglycerides_Willer_2013	ATP13A1	9526872	4.73e-05	0.0706
1021	Triglycerides	Triglycerides_Willer_2013	ADAL	9526882	5.42e-05	0.0772
1022	Triglycerides	Triglycerides_Willer_2013	SLC5A6	9526890	5.74e-05	0.0782
1023	Type 2 Diabetes	WTCCC_T2D_07	RP11-247C2.2	10453127	7.44e-07	0.0221
1024	Ulcerative Colitis	Ulcerative_colitis_meta	RGS14	11972143	2.39e-13	7.51e-09
1025	Ulcerative Colitis	Ulcerative_colitis_meta	LOC145846	11972149	6.88e-08	0.00108
1026	Ulcerative Colitis	Ulcerative_colitis_meta	CHRM3	11972152	4.1e-07	0.0043
1027	Ulcerative Colitis	Ulcerative_colitis_meta	RNF123	11972158	6.11e-07	0.0048
1028	Ulcerative Colitis	Ulcerative_colitis_meta	WDR66	11972162	1.2e-06	0.00752
1029	Ulcerative Colitis	Ulcerative_colitis_meta	RBM6	11972171	1.45e-06	0.00762
1030	Ulcerative Colitis	Ulcerative_colitis_meta	PASK	11972178	2.46e-06	0.0111
1031	Ulcerative Colitis	Ulcerative_colitis_meta	WRB	11972187	3.88e-06	0.0153
1032	Ulcerative Colitis	Ulcerative_colitis_meta	IGSF1	11972190	4.51e-06	0.0158
1033	Ulcerative Colitis	Ulcerative_colitis_meta	ST8SIA5	11972197	6.06e-06	0.0176
1034	Ulcerative Colitis	Ulcerative_colitis_meta	STX1A	11972201	6.14e-06	0.0176
1035	Ulcerative Colitis	Ulcerative_colitis_meta	DLD	11972205	6.75e-06	0.0177
1036	Ulcerative Colitis	Ulcerative_colitis_meta	C20orf27	11972209	9.07e-06	0.0208
1037	Ulcerative Colitis	Ulcerative_colitis_meta	S100G	11972211	9.26e-06	0.0208
1038	Ulcerative Colitis	Ulcerative_colitis_meta	IP6K1	11972213	1.3e-05	0.0269
1039	Ulcerative Colitis	Ulcerative_colitis_meta	RHOA	11972217	1.37e-05	0.0269
1040	Ulcerative Colitis	Ulcerative_colitis_meta	ACAP1	11972223	1.75e-05	0.0319
1041	Ulcerative Colitis	Ulcerative_colitis_meta	TCERG1L	11972228	1.82e-05	0.0319
1042	Ulcerative Colitis	Ulcerative_colitis_meta	GALNT9	11972234	1.98e-05	0.0328
1043	Ulcerative Colitis	Ulcerative_colitis_meta	CCDC88C	11972239	2.21e-05	0.0333
1044	Ulcerative Colitis	Ulcerative_colitis_meta	USP4	11972242	2.22e-05	0.0333
1045	Ulcerative Colitis	Ulcerative_colitis_meta	HPCAL1	11972247	2.62e-05	0.0374
1046	Ulcerative Colitis	Ulcerative_colitis_meta	CDH18	11972252	2.98e-05	0.0408
1047	Ulcerative Colitis	Ulcerative_colitis_meta	NEUROD2	11972259	3.24e-05	0.0424
1048	Ulcerative Colitis	Ulcerative_colitis_meta	ZMYND10	11972263	3.81e-05	0.0479
1049	Ulcerative Colitis	Ulcerative_colitis_meta	GPR88	11972270	4.56e-05	0.0548
1050	Ulcerative Colitis	Ulcerative_colitis_meta	ORMDL3	11972275	4.7e-05	0.0548
1051	Ulcerative Colitis	Ulcerative_colitis_meta	RAPGEFL1	11972279	5.16e-05	0.0565
1052	Ulcerative Colitis	Ulcerative_colitis_meta	CAMKV	11972281	5.21e-05	0.0565
1053	Ulcerative Colitis	Ulcerative_colitis_meta	DAG1	11972285	5.47e-05	0.0573
1054	Ulcerative Colitis	Ulcerative_colitis_meta	OLAH	11972291	6.06e-05	0.0615
1055	Ulcerative Colitis	Ulcerative_colitis_meta	CAMSAP2	11972295	7.21e-05	0.0709
1056	Ulcerative Colitis	Ulcerative_colitis_meta	AMT	11972303	7.74e-05	0.0709
1057	Ulcerative Colitis	Ulcerative_colitis_meta	CPNE9	11972308	7.8e-05	0.0709
1058	Ulcerative Colitis	Ulcerative_colitis_meta	ELAVL4	11972319	7.89e-05	0.0709
1059	Ulcerative Colitis	Ulcerative_colitis_meta	LOC374514	11972323	8.63e-05	0.0743
1060	Ulcerative Colitis	Ulcerative_colitis_meta	CACNB1	11972328	8.74e-05	0.0743
1061	Ulcerative Colitis	Ulcerative_colitis_meta	ZPBP2	11972331	9.82e-05	0.0812
1062	Ulcerative Colitis	Ulcerative_colitis_meta	ADORA2A	11972336	0.000119	0.0947
1063	Ulcerative Colitis	Ulcerative_colitis_meta	UBA7	11972341	0.000121	0.0947
1064	Upper Gastrointestinal Cancer	UpperGastrointestinalCancerAsian_pha003106	PLCE1	12973366	1.83e-06	0.0286
1065	Upper Gastrointestinal Cancer	UpperGastrointestinalCancerAsian_pha003106	SEMG2	12973371	1.89e-06	0.0286
1066	Waist Circumference	GIANT_2015_WC_COMBINED_AllAncestries	RP11-1348G14.6	831323	2.1e-07	0.00279
1067	Waist Circumference	GIANT_2015_WC_COMBINED_AllAncestries	NPIPB6	831334	2.19e-07	0.00279
1068	Waist Circumference	GIANT_2015_WC_COMBINED_AllAncestries	NPIPB7	831344	2.66e-07	0.00279
1069	Waist Circumference	GIANT_2015_WC_COMBINED_AllAncestries	NEGR1	831351	3.88e-07	0.00305
1070	Waist Circumference	GIANT_2015_WC_COMBINED_AllAncestries	TUFM	831365	6.58e-07	0.00414
1071	Waist Circumference	GIANT_2015_WC_COMBINED_AllAncestries	CDC37P1	831377	7.89e-07	0.00414
1072	Waist Circumference	GIANT_2015_WC_COMBINED_AllAncestries	RP11-22P6.3	831386	9.87e-07	0.00422
1073	Waist Circumference	GIANT_2015_WC_COMBINED_AllAncestries	NUPR1	831400	1.08e-06	0.00422
1074	Waist Circumference	GIANT_2015_WC_COMBINED_AllAncestries	TFAP2B	831406	1.26e-06	0.0044
1075	Waist Circumference	GIANT_2015_WC_COMBINED_AllAncestries	FUBP1	831414	2.79e-06	0.00876
1076	Waist Circumference	GIANT_2015_WC_COMBINED_AllAncestries	EIF3CL	831424	3.45e-06	0.00985
1077	Waist Circumference	GIANT_2015_WC_COMBINED_AllAncestries	NFATC2IP	831436	1.02e-05	0.0268
1078	Waist Circumference	GIANT_2015_WC_COMBINED_AllAncestries	TMEM219	831445	1.76e-05	0.0426
1079	Waist Circumference	GIANT_2015_WC_COMBINED_EUR	NPIPB7	9800275	3.02e-07	0.00452
1080	Waist Circumference	GIANT_2015_WC_COMBINED_EUR	NEGR1	9800282	4.22e-07	0.00452
1081	Waist Circumference	GIANT_2015_WC_COMBINED_EUR	RP11-1348G14.6	9800295	5.51e-07	0.00452
1082	Waist Circumference	GIANT_2015_WC_COMBINED_EUR	NPIPB6	9800327	6.43e-07	0.00452
1083	Waist Circumference	GIANT_2015_WC_COMBINED_EUR	TUFM	9800368	8.06e-07	0.00452
1084	Waist Circumference	GIANT_2015_WC_COMBINED_EUR	RP11-22P6.3	9800390	9.12e-07	0.00452
1085	Waist Circumference	GIANT_2015_WC_COMBINED_EUR	TFAP2B	9800401	1.01e-06	0.00452
1086	Waist Circumference	GIANT_2015_WC_COMBINED_EUR	CDC37P1	9800428	1.34e-06	0.00525
1087	Waist Circumference	GIANT_2015_WC_COMBINED_EUR	FUBP1	9800448	2.3e-06	0.00804
1088	Waist Circumference	GIANT_2015_WC_COMBINED_EUR	NUPR1	9800479	2.8e-06	0.00881
1089	Waist Circumference	GIANT_2015_WC_COMBINED_EUR	EIF3CL	9800494	3.16e-06	0.00904
1090	Waist Circumference	GIANT_2015_WC_COMBINED_EUR	NFATC2IP	9800518	9.74e-06	0.0255
1091	Waist Circumference	GIANT_2015_WC_COMBINED_EUR	TMEM219	9800532	1.76e-05	0.0426
1092	Waist Circumference	GIANT_2015_WC_FEMALES_AllAncestries	NPIPB7	6948033	1.05e-06	0.0307
1093	Waist Circumference	GIANT_2015_WC_FEMALES_AllAncestries	NEGR1	6948035	2.9e-06	0.0307
1094	Waist Circumference	GIANT_2015_WC_FEMALES_AllAncestries	CDC37P1	6948039	2.94e-06	0.0307
1095	Waist Circumference	GIANT_2015_WC_FEMALES_AllAncestries	TUFM	6948042	1.26e-05	0.0985
1096	Waist Circumference	GIANT_2015_WC_FEMALES_EUR	NPIPB7	2467900	1.25e-06	0.011
1097	Waist Circumference	GIANT_2015_WC_FEMALES_EUR	NPIPB6	2467905	1.3e-06	0.011
1098	Waist Circumference	GIANT_2015_WC_FEMALES_EUR	RP11-1348G14.6	2467912	1.3e-06	0.011
1099	Waist Circumference	GIANT_2015_WC_FEMALES_EUR	NEGR1	2467918	1.4e-06	0.011
1100	Waist Circumference	GIANT_2015_WC_FEMALES_EUR	CDC37P1	2467925	2.59e-06	0.0163
1101	Waist Circumference	GIANT_2015_WC_FEMALES_EUR	TUFM	2467935	1.21e-05	0.0635
1102	Waist Circumference	GIANT_2015_WC_FEMALES_EUR	NFATC2IP	2467945	1.69e-05	0.0758
1103	Waist Circumference	GIANT_2015_WC_MALES_AllAncestries	NPIPB6	7907745	8.67e-07	0.0135
1104	Waist Circumference	GIANT_2015_WC_MALES_AllAncestries	RP11-1348G14.6	7907768	8.67e-07	0.0135
1105	Waist Circumference	GIANT_2015_WC_MALES_AllAncestries	NUPR1	7907823	1.56e-06	0.0137
1106	Waist Circumference	GIANT_2015_WC_MALES_AllAncestries	EIF3CL	7907840	1.97e-06	0.0137
1107	Waist Circumference	GIANT_2015_WC_MALES_AllAncestries	NEGR1	7907849	2.21e-06	0.0137
1108	Waist Circumference	GIANT_2015_WC_MALES_AllAncestries	NFATC2IP	7907872	7.41e-06	0.0384
1109	Waist Circumference	GIANT_2015_WC_MALES_AllAncestries	TFAP2B	7907888	1.05e-05	0.0465
1110	Waist Circumference	GIANT_2015_WC_MALES_AllAncestries	RBL2	7907918	2.31e-05	0.0898
1111	Waist Circumference	GIANT_2015_WC_MALES_EUR	NUPR1	7169110	1.75e-06	0.0177
1112	Waist Circumference	GIANT_2015_WC_MALES_EUR	NPIPB6	7169149	1.81e-06	0.0177
1113	Waist Circumference	GIANT_2015_WC_MALES_EUR	RP11-1348G14.6	7169171	1.81e-06	0.0177
1114	Waist Circumference	GIANT_2015_WC_MALES_EUR	EIF3CL	7169180	2.35e-06	0.0177
1115	Waist Circumference	GIANT_2015_WC_MALES_EUR	TFAP2B	7169200	2.84e-06	0.0177
1116	Waist Circumference	GIANT_2015_WC_MALES_EUR	NEGR1	7169213	3.9e-06	0.0202
1117	Waist Circumference	GIANT_2015_WC_MALES_EUR	NFATC2IP	7169239	7.01e-06	0.0311
1118	Waist Circumference	GIANT_2015_WC_MALES_EUR	RBL2	7169259	1.6e-05	0.062
1119	Waist Circumference	GIANT_2015_WC_MALES_EUR	IL27	7169280	2.53e-05	0.0874
1120	Waist Circumference	GIANT_Randall2013PlosGenet_WC_MEN_N	EIF3CL	7874807	2.56e-06	0.0419
1121	Waist Circumference	GIANT_Randall2013PlosGenet_WC_MEN_N	HCN4	7874828	4.35e-06	0.0419
1122	Waist Circumference	GIANT_Randall2013PlosGenet_WC_MEN_N	NFATC2IP	7874852	4.79e-06	0.0419
1123	Waist Circumference	GIANT_Randall2013PlosGenet_WC_MEN_N	CDC37P1	7874890	5.29e-06	0.0419
1124	Waist Circumference	GIANT_Randall2013PlosGenet_WC_MEN_N	RP11-22P6.3	7874909	1.06e-05	0.0661
1125	Waist Circumference	GIANT_Randall2013PlosGenet_WC_MEN_N	TUFM	7874932	1.42e-05	0.0661
1126	Waist Circumference	GIANT_Randall2013PlosGenet_WC_MEN_N	NPIPB7	7874960	1.46e-05	0.0661
1127	Waist Circumference	GIANT_Randall2013PlosGenet_WC_MEN_N	RP11-396N11.1	7874969	2.42e-05	0.0959
1128	Waist Circumference Adjusted For Bmi	GIANT_2015_WCadjBMI_FEMALES_AllAncestries	CCDC92	10506874	1.46e-06	0.0459
1129	Waist Circumference Adjusted For Bmi	GIANT_2015_WCadjBMI_FEMALES_EUR	CCDC92	9840316	1.41e-06	0.0442
1130	Waist Circumference Adjusted For Bmi	GIANT_Randall2013PlosGenet_WCadjBMI_WOMEN_N	SLC38A11	4007135	3.52e-06	0.0716
1131	Waist Circumference Adjusted For Bmi	GIANT_Randall2013PlosGenet_WCadjBMI_WOMEN_N	ADAMTSL3	4007165	4.52e-06	0.0716
1132	Waist-hip Ratio Adjusted For Bmi	GIANT_2015_WHRadjBMI_COMBINED_AllAncestries	CCDC92	2963392	2.32e-06	0.073
1133	Waist-hip Ratio Adjusted For Bmi	GIANT_2015_WHRadjBMI_COMBINED_EUR	CCDC92	7907906	2.32e-06	0.073
1134	Waist-hip Ratio Adjusted For Bmi	GIANT_2015_WHRadjBMI_FEMALES_AllAncestries	CCDC92	7031099	5.34e-07	0.0168
1135	Waist-hip Ratio Adjusted For Bmi	GIANT_2015_WHRadjBMI_FEMALES_EUR	CCDC92	5411355	5.44e-07	0.0171
1136	Waist-hip Ratio Adjusted For Bmi	GIANT_WHRADJ_MEN_GT50	GDF5	12881242	2.66e-06	0.0827
1137	Weight	GIANT_Randall2013PlosGenet_WEIGHT_MEN_N	FUBP1	51503	7.63e-07	0.0123
1138	Weight	GIANT_Randall2013PlosGenet_WEIGHT_MEN_N	NEGR1	51520	7.77e-07	0.0123
1139	Weight	GIANT_Randall2013PlosGenet_WEIGHT_MEN_N	HCN4	51533	2.32e-06	0.0245
1140	Blood_test_indicator	C_reactive_protein_Prins_2017	HNF1A	3180438	1.98e-06	0.0648
1141	Stoke	MALIKR_Stroke_AIS_TRANS	ALDH2	9380268	3.07e-07	0.00989
1142	Stoke	MALIKR_Stroke_AS_TRANS	ALDH2	685535	1.98e-06	0.064
1143	Stoke	MALIKR_Stroke_CES_TRANS	ACLY	9533578	2.5e-06	0.0809
1144	Stoke	MALIKR_Stroke_SVS_TRANS	ALDH2	10290403	1.44e-07	0.00456
1145	Stoke	MALIKR_Stroke_SVS_TRANS	KRTAP19-7	10290408	1.86e-06	0.0296
1146	Multiple Sclerosis	MultipleSclerosis_Sawcer2011	HLA-DOA	11308926	1.61e-07	0.00491
1147	Multiple Sclerosis	MultipleSclerosis_Sawcer2011	TAP2	11308936	4.22e-07	0.00643
1148	Multiple Sclerosis	MultipleSclerosis_Sawcer2011	PSMB9	11308979	1.58e-06	0.016
1149	Multiple Sclerosis	MultipleSclerosis_Sawcer2011	GPR65	11309017	3.64e-06	0.0277
1150	Multiple Sclerosis	MultipleSclerosis_Sawcer2011	SP110	11309032	1.4e-05	0.0854
1151	Neuromyelitis Optica	NeuromyelitisOptica_EstradaK2018_IgGNeg	FAM187B	8689780	9.84e-07	0.0317
1152	Neuromyelitis Optica	NeuromyelitisOptica_EstradaK2018_IgGPos	RP11-505P4.7	1394076	9.69e-09	0.000313
1153	Neuromyelitis Optica	NeuromyelitisOptica_EstradaK2018_IgGPos	BTN3A2	1394147	1.82e-07	0.00294
1154	Blood_test_indicator	Prins_alkp	NBPF2P	7101911	1.35e-07	0.00443
1155	Blood_test_indicator	Prins_alt	CWF19L1	50404	1.33e-06	0.0435
1156	Blood_test_indicator	Prins_ast	AP2M1	10539979	2.57e-06	0.0822
1157	Blood_test_indicator	Prins_ast	MRC1	10540005	5.03e-06	0.0822
1158	Blood_test_indicator	Prins_chol	ALDH1A2	6827801	2.93e-06	0.096
1159	Blood_test_indicator	Prins_dheas	CYP3A7	10506782	2.44e-08	0.000586
1160	Blood_test_indicator	Prins_dheas	GS1-259H13.2	10506795	3.58e-08	0.000586
1161	Blood_test_indicator	Prins_ggt	AP000356.1	823777	1.16e-06	0.038
1162	Blood_test_indicator	Prins_hscrp	HNF1A	4060504	1.98e-06	0.0648
1163	Blood_test_indicator	Prins_trig	ANGPTL3	1	3.84e-07	0.0126
1164	Blood_test_indicator	Prins_trig	DOCK7	2	3.04e-06	0.0497
1165	Longevity	Pilling_2017_UKB_GWAS.parents_attained_age	RP11-950C14.7	5082974	2.12e-06	0.0683
1166	Longevity	Pilling_2017_UKB_GWAS.father_attained_age	PSMA5	2741115	9.71e-07	0.0264
1167	Longevity	Pilling_2017_UKB_GWAS.father_attained_age	PSRC1	2741153	1.64e-06	0.0264
1168	Longevity	Pilling_2017_UKB_GWAS.father_attained_age	PSMA4	2741172	5.91e-06	0.0636
1169	Longevity	Pilling_2017_UKB_GWAS.father_attained_age	SORT1	2741194	9.71e-06	0.0675
1170	Longevity	Pilling_2017_UKB_GWAS.father_attained_age	RP11-950C14.7	2741207	1.05e-05	0.0675
1171	Alzheimer's Disease (AD)	AD_meta_fang	CEACAM19	12854768	4.61e-09	0.000149
1172	Alzheimer's Disease (AD)	AD_meta_fang	APOE	12854782	9.95e-09	0.000161
1173	Alzheimer's Disease (AD)	AD_meta_fang	CTB-171A8.1	12854798	2.53e-08	0.000272
1174	Alzheimer's Disease (AD)	AD_meta_fang	AC074212.5	12854810	1.69e-06	0.0124
1175	Alzheimer's Disease (AD)	AD_meta_fang	EML2	12854816	1.92e-06	0.0124
1176	Alzheimer's Disease (AD)	AD_meta_fang	MARK4	12854836	2.45e-06	0.0132
1177	Alzheimer's Disease (AD)	AD_meta_fang	PTK2B	12854848	9.06e-06	0.0418
1178	Alzheimer's Disease (AD)	AD_meta_fang	PPP1R37	12854862	1.15e-05	0.0467
1179	Alzheimer's Disease (AD)	AD_meta_fang	CLASRP	12854867	2.02e-05	0.0725
1180	Breast Cancer	bcac_onco_icogs_gwas	RP6-42F4.1	5370512	7.85e-08	0.00159
1181	Breast Cancer	bcac_onco_icogs_gwas	HIST2H2BA	5370525	9.69e-08	0.00159
1182	Breast Cancer	bcac_onco_icogs_gwas	AC022431.2	5370536	2.06e-06	0.0225
1183	Breast Cancer	bcac_onco_icogs_gwas	HIST2H3DP1	5370545	4.5e-06	0.0365
1184	Breast Cancer	bcac_onco_icogs_gwas	AC022431.3	5370553	6.19e-06	0.0365
1185	Breast Cancer	bcac_onco_icogs_gwas	FAM215B	5370630	6.69e-06	0.0365
1186	Breast Cancer	bcac_onco_icogs_gwas	RP11-53O19.1	5370644	1.19e-05	0.0557
1187	Breast Cancer	bcac_onco_icogs_gwas	SGCE	5370667	1.53e-05	0.0557
1188	Breast Cancer	bcac_onco_icogs_gwas	FDXACB1	5370676	1.66e-05	0.0557
1189	Breast Cancer	bcac_onco_icogs_gwas	RP11-967K21.1	5370688	1.7e-05	0.0557
1190	Breast Cancer	bcac_onco_icogs_gwas	OR4D1	5370697	2.49e-05	0.074
1191	Breast Cancer	bcac_onco_icogs_gwas	RAD51B	5370713	3.09e-05	0.0843
1192	Breast Cancer	bcac_onco_icogs_gwas	CTB-39G8.3	5370869	4.23e-05	0.1
1193	Breast Cancer	bcac_onco_icogs_gwas	PSMD6	5370898	4.29e-05	0.1
1194	Parental AD	AD_parental_UKBB_2018	CTB-171A8.1	14303911	1.3e-08	0.000219
1195	Parental AD	AD_parental_UKBB_2018	CEACAM19	14303915	1.34e-08	0.000219
1196	Parental AD	AD_parental_UKBB_2018	MARK4	14303916	5.12e-07	0.00557
1197	Parental AD	AD_parental_UKBB_2018	GEMIN7	14303918	2.08e-06	0.0141
1198	Parental AD	AD_parental_UKBB_2018	OPA3	14303920	2.24e-06	0.0141
1199	Parental AD	AD_parental_UKBB_2018	ZNF225	14303923	2.59e-06	0.0141
1200	Parental AD	AD_parental_UKBB_2018	ZNF226	14303925	4.52e-06	0.021

## Sheet: metabolite (q<=0.1)
	disease	GWAS	metabolite	pval	qval
0	Age Related Macular Degeneration	AMD_Fritsche_2015	1-(1-enyl-palmitoyl)-2-palmitoyl-GPC(P-16:0/16:0)	0.000148	0.091
1	Alzheimer's Disease (AD)	Alzheimer_IGAP	palmitoyldihydrosphingomyelin(d18:0/16:0)	7.38e-05	0.0445
2	Autism	AUT_pha003609_High-IQ_Additive_Stage-1_All	palmitoyl-linoleoyl-glycerol(16:0/18:2)[1]	0.000111	0.0672
3	Autism	AUT_pha003611_High-IQ_Paternal_Stage-1_All	X-11308	1.8e-05	0.0104
4	Autism	AUT_pha003612_Low-IQ_Additive_Stage-1_All	X-15503	5.51e-05	0.0355
5	Autism	AUT_pha003612_Low-IQ_Additive_Stage-1_All	taurodeoxycholate	0.000187	0.0602
6	Autism	AUT_pha003618_Spectrum-Autism_Additive_Stage-1_All	pregnenolonesulfate	7.04e-05	0.0454
7	Autism	AUT_pha003648_Low-IQ_Additive_Stage-2_All	N-acetylglutamine	0.000352	0.0833
8	Autism	AUT_pha003648_Low-IQ_Additive_Stage-2_All	epiandrosteronesulfate	0.000418	0.0833
9	Autism	AUT_pha003648_Low-IQ_Additive_Stage-2_All	androsteronesulfate	0.000469	0.0833
10	Autism	AUT_pha003648_Low-IQ_Additive_Stage-2_All	dehydroisoandrosteronesulfate(DHEA-S)	0.000517	0.0833
11	Autism	AUT_pha003648_Low-IQ_Additive_Stage-2_All	5alpha-androstan-3beta_17beta-dioldisulfate	0.000694	0.0894
12	Autism	AUT_pha003662_Verbal_Paternal_Stage-2_All	alpha-glutamylglycine	9.38e-05	0.0604
13	Autism	AUT_pha003680_Verbal_Paternal_Stage-2_Eur	homocitrulline	1.47e-06	0.000932
14	Autism	AUT_pha003680_Verbal_Paternal_Stage-2_Eur	alpha-glutamylglycine	0.000134	0.0426
15	Autism	AUT_pha003684_Low-IQ_Additive_Stage-1-and-2_All	1-palmitoyl-2-linoleoyl-GPC(16:0/18:2)	5.11e-05	0.0169
16	Autism	AUT_pha003684_Low-IQ_Additive_Stage-1-and-2_All	dehydroisoandrosteronesulfate(DHEA-S)	5.25e-05	0.0169
17	Autism	AUT_pha003684_Low-IQ_Additive_Stage-1-and-2_All	16a-hydroxyDHEA3-sulfate	0.000131	0.028
18	Autism	AUT_pha003684_Low-IQ_Additive_Stage-1-and-2_All	androsteroidmonosulfate(1)	0.000454	0.073
19	Autism	AUT_pha003684_Low-IQ_Additive_Stage-1-and-2_All	androsteronesulfate	0.000983	0.0984
20	Autism	AUT_pha003684_Low-IQ_Additive_Stage-1-and-2_All	5alpha-androstan-3beta_17beta-dioldisulfate	0.00113	0.0984
21	Autism	AUT_pha003684_Low-IQ_Additive_Stage-1-and-2_All	nonanoylcarnitine	0.0012	0.0984
22	Autism	AUT_pha003684_Low-IQ_Additive_Stage-1-and-2_All	4-androsten-3beta_17beta-diolmonosulfate(2)	0.00122	0.0984
23	Autism	AUT_pha003690_Spectrum-Autism_Additive_Stage-1-and-2_All	behenoylsphingomyelin(d18:1/22:0)	0.000133	0.0695
24	Autism	AUT_pha003702_Low-IQ_Additive_Stage-1-and-2_Eur	16a-hydroxyDHEA3-sulfate	0.000131	0.082
25	Autism	AUT_pha003728_Word_Recessive_Stage-1_All	X-11850	7.55e-05	0.0427
26	Bipolar Disorder	BipolarDisorder_pha002858	ergothioneine	8.01e-05	0.0484
27	Bipolar Disorder And Schizophrenia	PGC.BPSCZ_BP_only	X-11441	4.34e-05	0.0223
28	Breast Cancer	BreastCancer_pha001335	sulfate	9.88e-05	0.0627
29	Breast Cancer	BreastCancer_pha001337	sulfate	9.21e-05	0.0584
30	Cholesterol	Cholestreol_TC_ONE_Eur	2-arachidonoyl-GPE(20:4)	9.36e-05	0.0603
31	Cholesterol	Cholestreol_TC_ONE_Eur	X-24278	0.0002	0.0643
32	Cholesterol	Cholestreol_TC_ONE_Eur	1-linoleoyl-GPE(18:2)	0.000379	0.0813
33	Cholesterol	Cholestreol_TG_ONE_Eur	2-arachidonoyl-GPE(20:4)	9.92e-05	0.0563
34	Cholesterol	Cholestreol_TG_ONE_Eur	1-linoleoyl-GPE(18:2)	0.000175	0.0563
35	Cholesterol	Cholestreol_TG_ONE_Eur	dihomo-linolenate(20:3n3orn6)	0.000417	0.0799
36	Cholesterol	Cholestreol_TG_ONE_Eur	1-stearoyl-2-linoleoyl-GPI(18:0/18:2)	0.000507	0.0799
37	Cholesterol	Cholestreol_TG_ONE_Eur	2-linoleoyl-GPE(18:2)	0.000711	0.0799
38	Cholesterol	Cholestreol_TG_ONE_Eur	palmitoleoyl-oleoyl-glycerol(16:1/18:1)[2]	0.000745	0.0799
39	Chronic Kidney Disease	ChronicKidneyDisease_CKD_meta	homoarginine	0.000135	0.041
40	Chronic Kidney Disease	ChronicKidneyDisease_CKD_meta	xanthine	0.000178	0.041
41	Chronic Kidney Disease	ChronicKidneyDisease_eGFRcrea_meta	methioninesulfone	1.5e-05	0.00609
42	Chronic Kidney Disease	ChronicKidneyDisease_eGFRcrea_meta	guanidinoacetate	1.89e-05	0.00609
43	Chronic Kidney Disease	ChronicKidneyDisease_eGFRcrea_meta	homocitrulline	4.26e-05	0.00915
44	Chronic Kidney Disease	ChronicKidneyDisease_eGFRcrea_meta	pyroglutamine	0.000398	0.0641
45	Chronic Kidney Disease	ChronicKidneyDisease_eGFRcrea_meta	homoarginine	0.000694	0.0894
46	High-density Lipoprotein Cholesterol	Cholestreol_HDL_ONE_Eur	2-arachidonoyl-GPE(20:4)	8.41e-05	0.0498
47	Longevity	Perls_12_snp135_maf	X-24309	8.03e-05	0.0517
48	Longevity	Perls_12_snp135_maf	X-23314	0.000302	0.0973
49	Low-density Lipoprotein Cholesterol	Cholestreol_LDL_ONE_Eur	1-oleoylglycerol(18:1)	0.000121	0.0535
50	Low-density Lipoprotein Cholesterol	Cholestreol_LDL_ONE_Eur	X-24278	0.000172	0.0535
51	Fasting Glucose	MAGIC_Manning_et_al_FastingGlucose_Interaction	carnitine	0.000139	0.0757
52	Neuroblastoma	Neuroblastoma_pha002895	p-cresolsulfate	0.000136	0.0849
53	Pancreatic Cancer	PancreaticCancer_pha002874	X-17299	8.33e-05	0.0468
54	Rheumatoid Arthritis	RA_GWASmeta_Asian	isobutyrylcarnitine	0.000123	0.0681
55	Schizophrenia	Schizophrenia_PGC_SCZ2	methioninesulfone	2.15e-06	0.00139
56	Schizophrenia	Schizophrenia_pha002859	gamma-glutamylglutamate	3.97e-07	0.000246
57	Triglycerides	Triglycerides_Willer_2013	1-stearoyl-2-arachidonoyl-GPI(18:0/20:4)	0.000193	0.0979
58	Triglycerides	Triglycerides_Willer_2013	1-palmitoyl-2-arachidonoyl-GPI(16:0/20:4)	0.000508	0.0979
59	Triglycerides	Triglycerides_Willer_2013	2-arachidonoyl-GPE(20:4)	0.000569	0.0979
60	Triglycerides	Triglycerides_Willer_2013	X-24278	0.000608	0.0979
61	Waist Circumference Adjusted For Bmi	GIANT_2015_WCadjBMI_FEMALES_AllAncestries	1-palmitoleoyl-2-linoleoyl-GPC(16:1/18:2)	0.00013	0.0641
62	Weight	GIANT_Randall2013PlosGenet_WEIGHT_MEN_N	trigonelline(N'-methylnicotinate)	9.26e-05	0.045
