# Supplementary material for: Identifying the genetic basis and molecular mechanisms underlying phenotypic correlation between complex human traits using a gene-based approach
Source: Research Square preprint supplement (doi:10.21203/rs.3.rs-108940/v1), 2020-12-02
Supplement: Supplementary file 3 [file d496c778f7004b66d4d341ad.pdf]

## Fasting Glucose vs Breast Cancer\_1

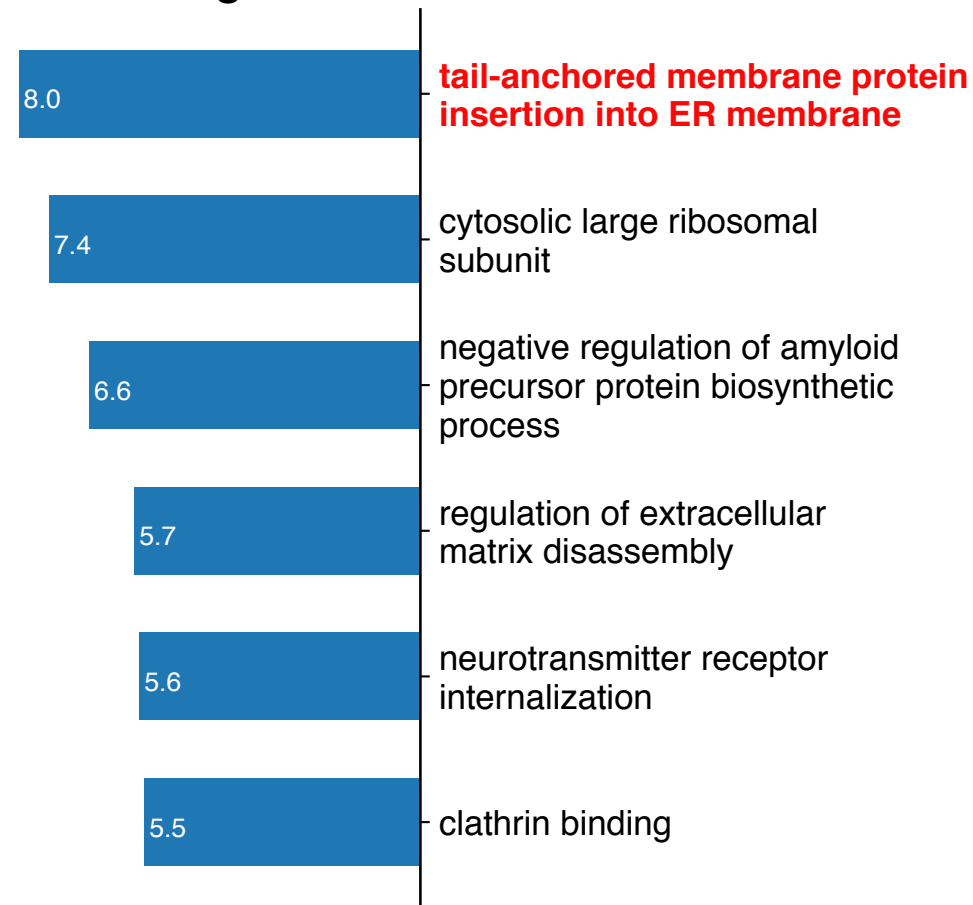

## Fasting Glucose vs Lung Cancer

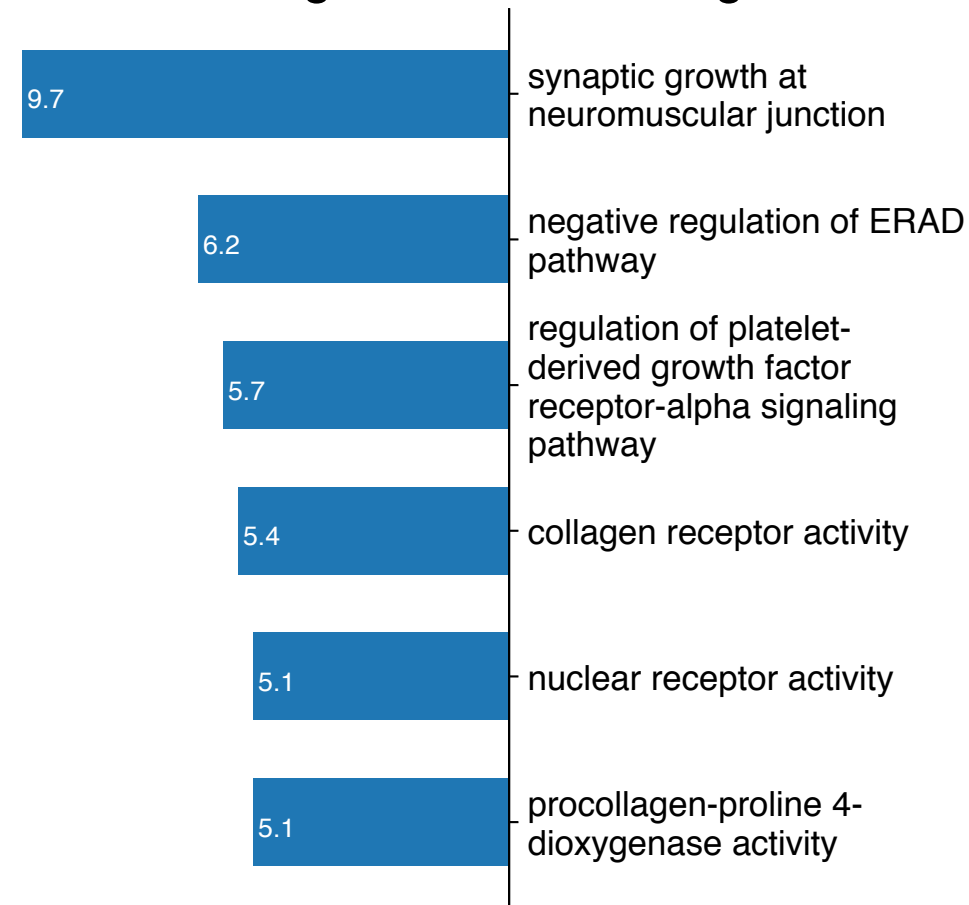

## Fasting Glucose vs Prostate Cancer

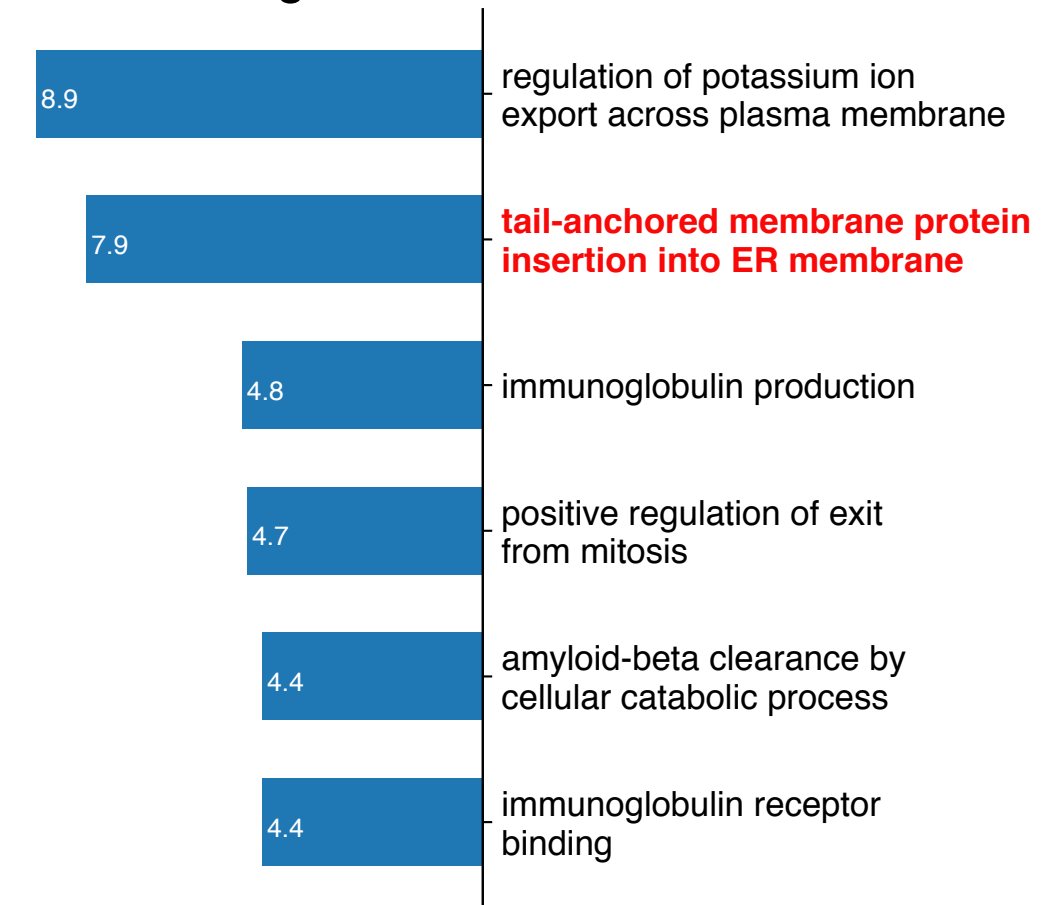

## Breast Cancer\_1 vs Lung Cancer

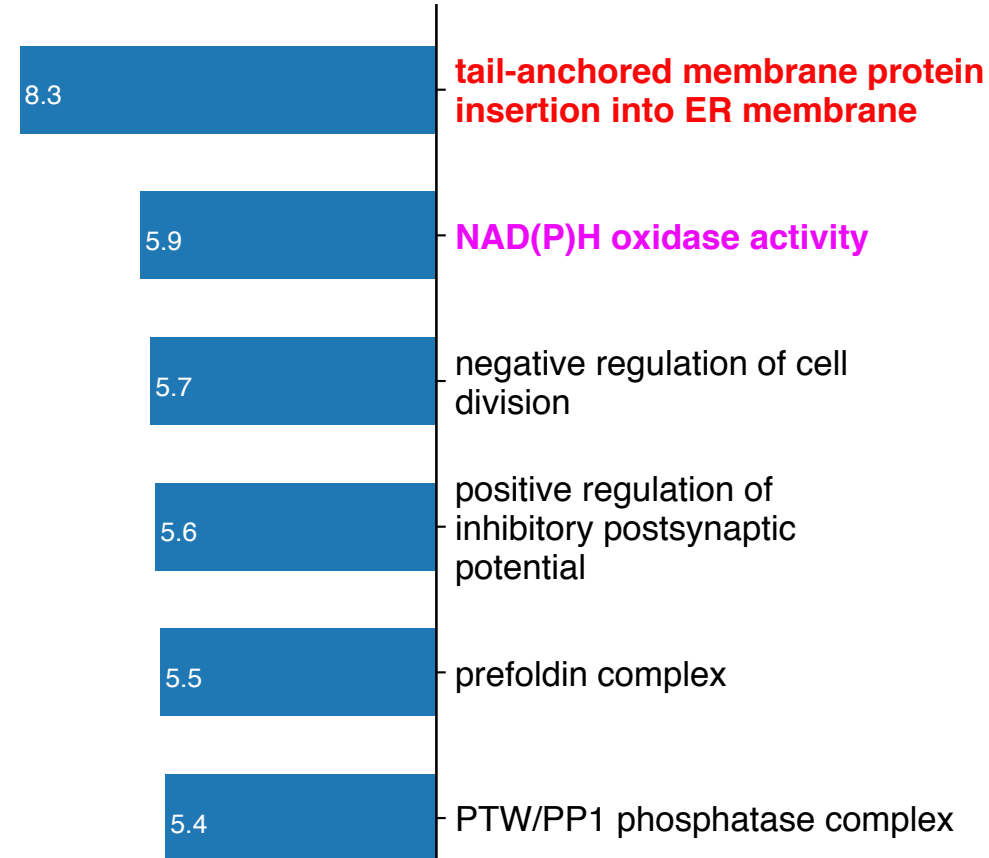

## Lung Cancer vs Prostate Cancer

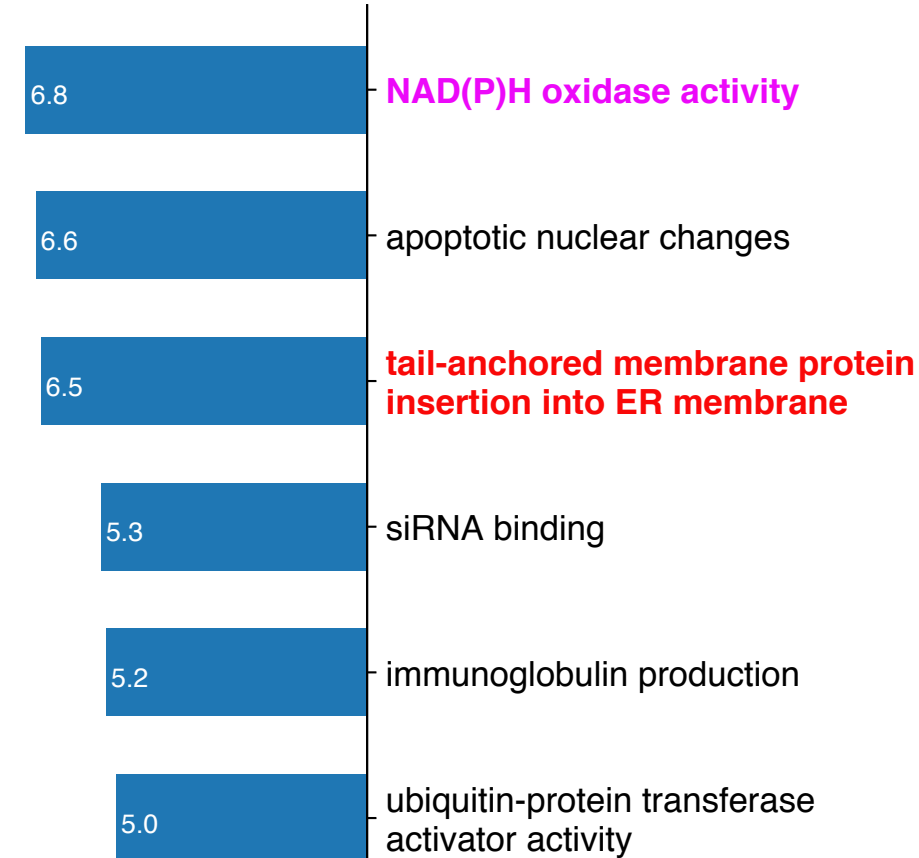

## Breast Cancer\_1 vs Prostate Cancer

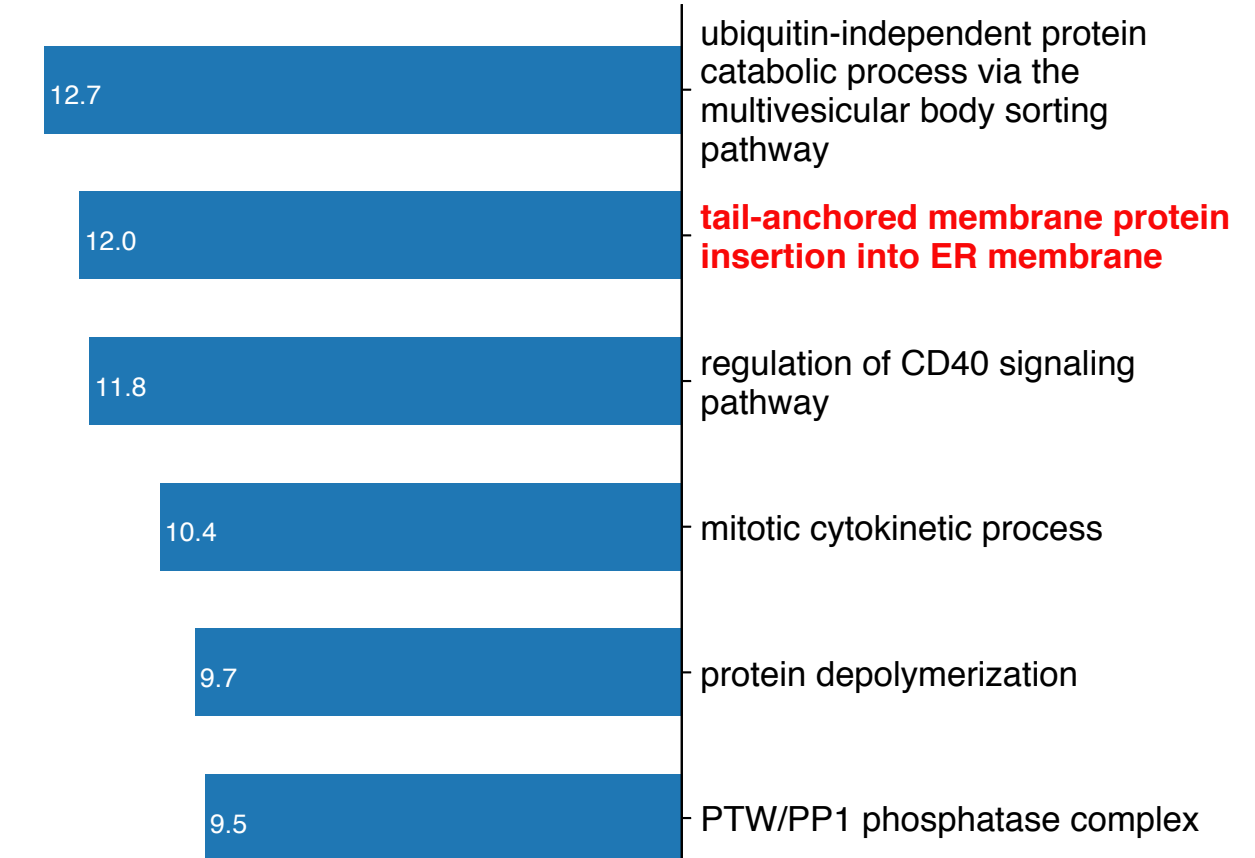

12 10 8 6 4 2 0

Z-score

12 10 8 6 4 2 0

Z-score

12 10 8 6 4 2 0

Z-score
