# Supplementary figures and images for: Identifying the genetic basis and molecular mechanisms underlying phenotypic correlation between complex human traits using a gene-based approach
Source: Research Square preprint supplement (doi:10.21203/rs.3.rs-108940/v1), 2020-12-02

Figure S3.

1)Euclidean\_distance 2)-log10p\_vector\_transformation 3)average linkage method

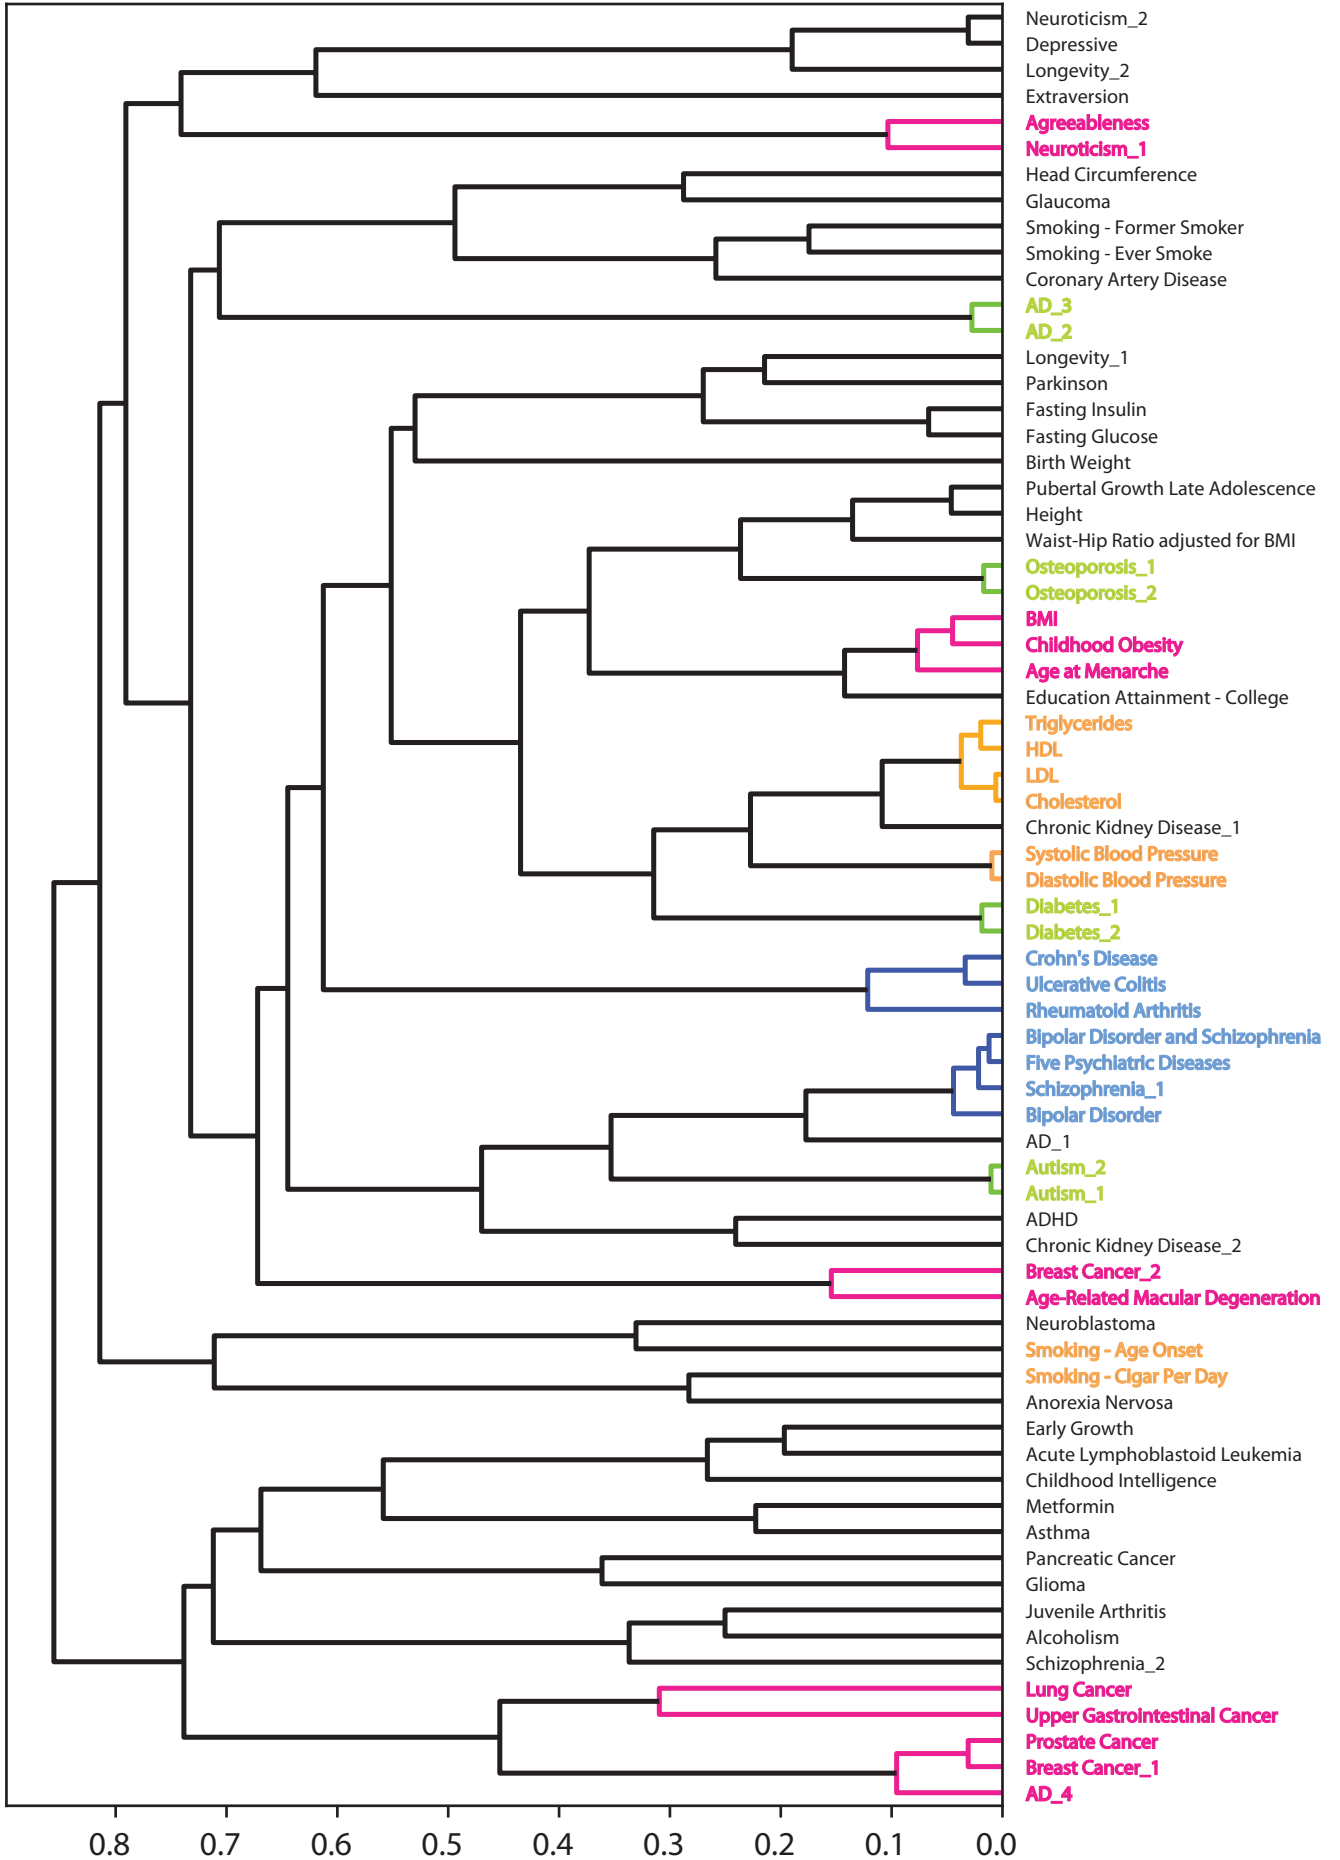

Supplement: Supplementary file 1 [file 194da6c92ffbabfe50671fe0.pdf]

Figure S4.

1)Manhattan\_distance 2)qnorm\_vector\_transformation 3)average linkage method

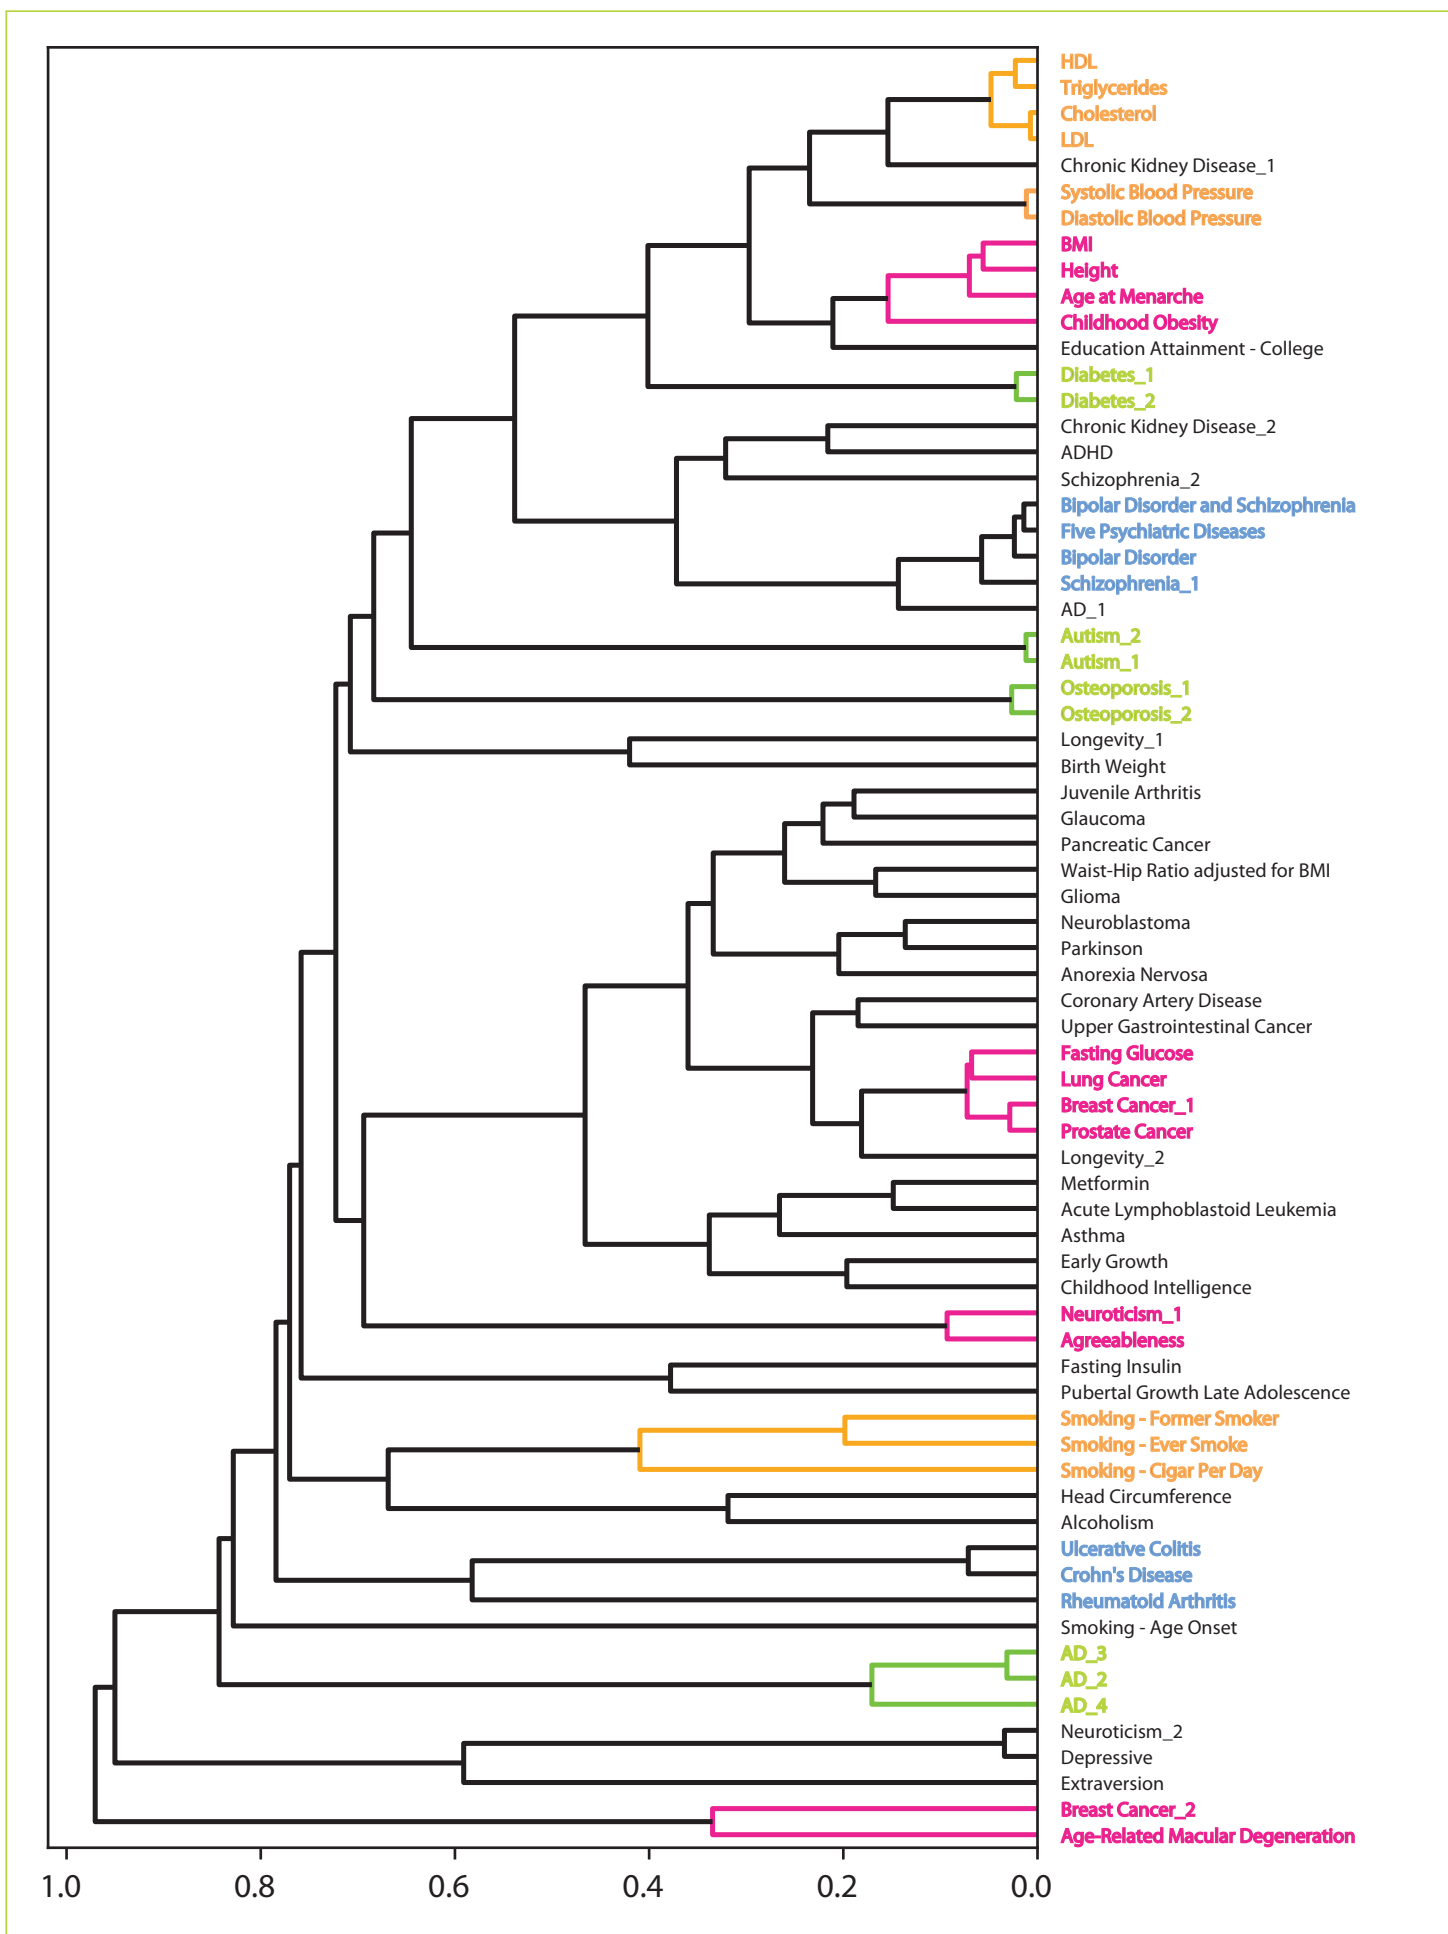

Supplement: Supplementary file 2 [file 64d060a42dd68598ffc18c78.pdf]

Figure S5.

1)Euclidean\_distance 2)qnorm\_vector\_transformation 3)weighted linkage method

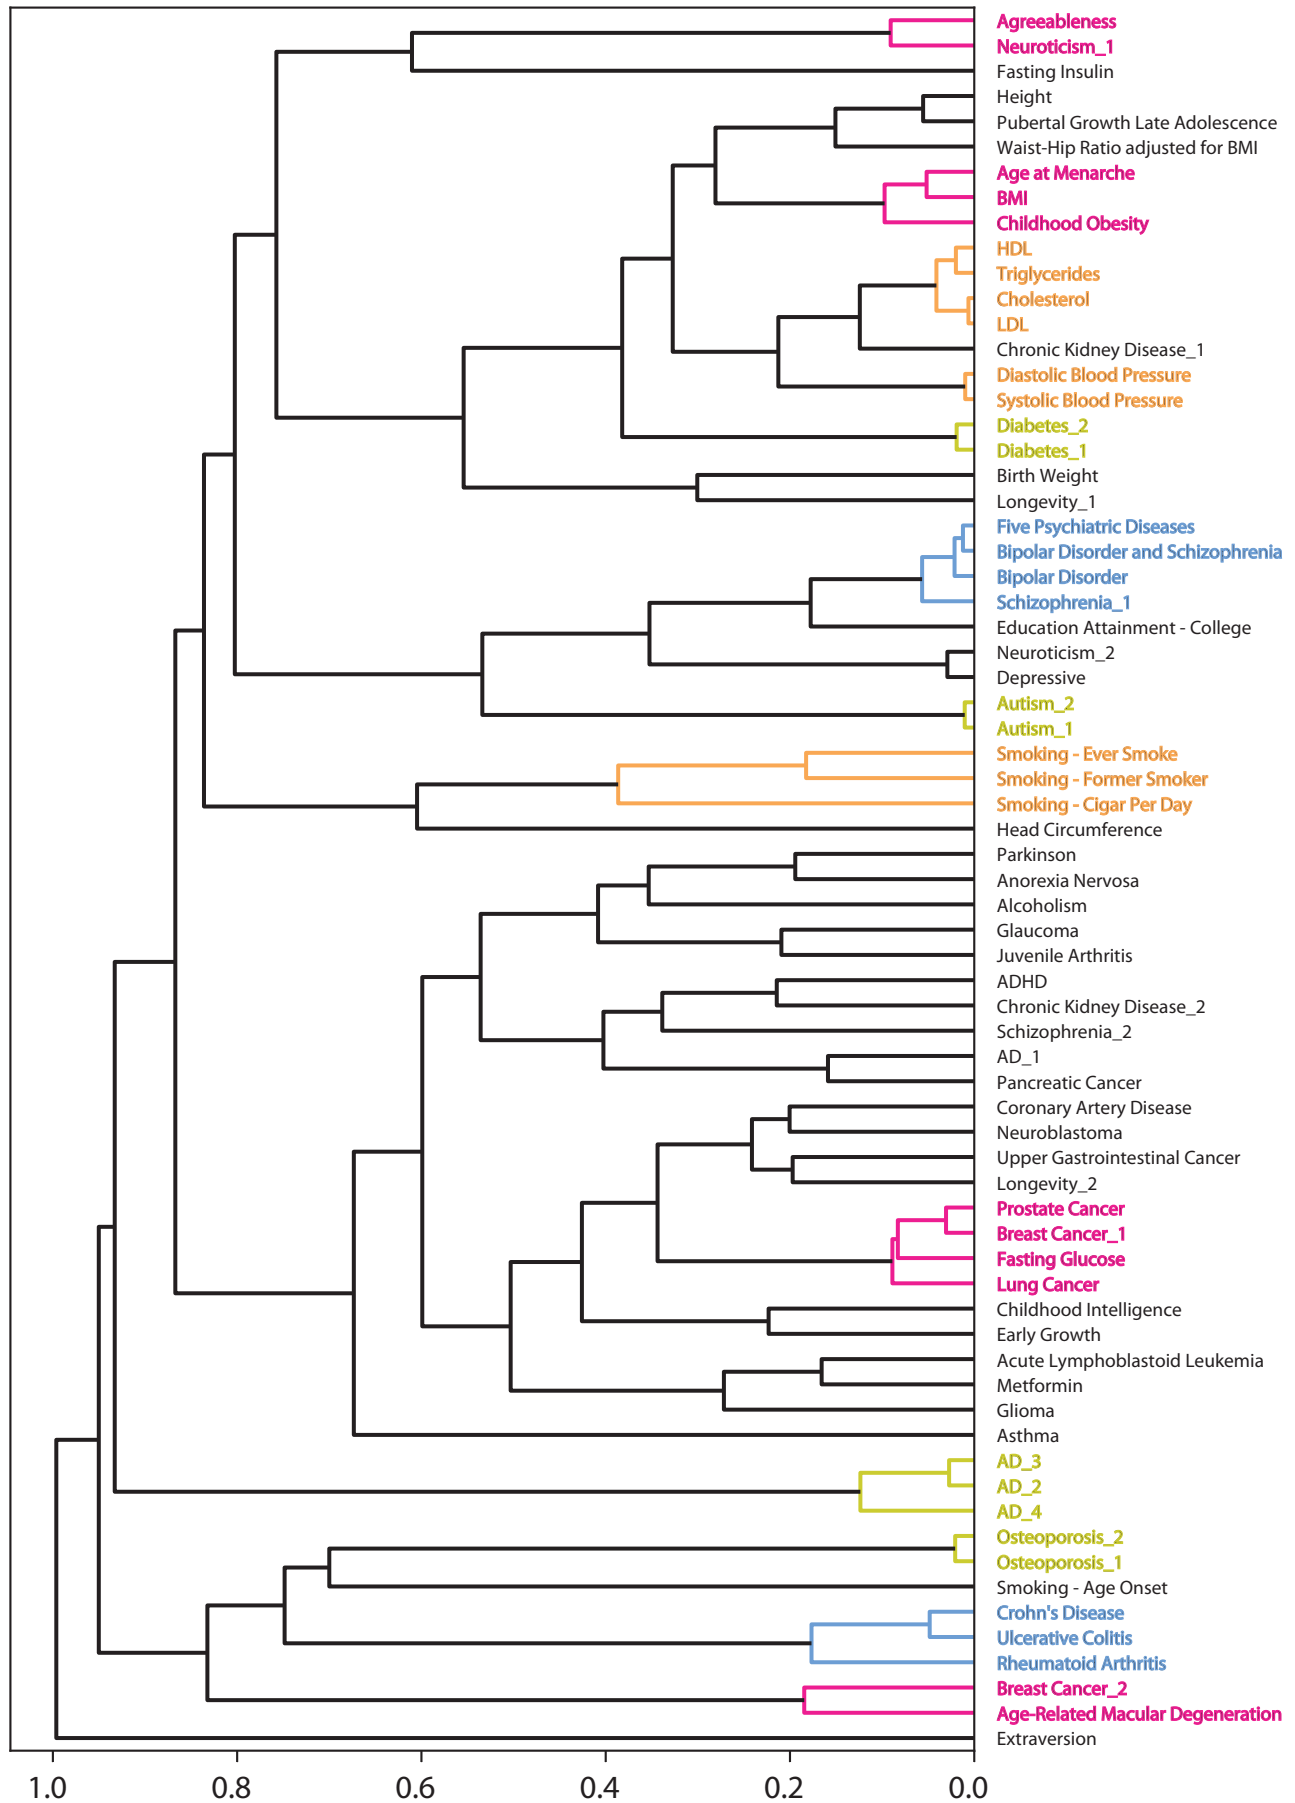

Supplement: Supplementary file 4 [file f15f572777c4048539726885.pdf]
